# The Molecular Biology, Biochemistry, and Physiology of Human Steroidogenesis and Its Disorders

Walter L. Miller and Richard J. Auchus

Department of Pediatrics (W.L.M.), University of California, San Francisco, San Francisco, California 94143-0978; and Department of Medicine (R.J.A.), University of Texas Southwestern Medical Center, Dallas, Texas 75235-8857

Steroidogenesis entails processes by which cholesterol is converted to biologically active steroid hormones. Whereas most endocrine texts discuss adrenal, ovarian, testicular, placental, and other steroidogenic processes in a gland-specific fashion, steroidogenesis is better understood as a single process that is repeated in each gland with cell-type-specific variations on a single theme. Thus, understanding steroidogenesis is rooted in an understanding of the biochemistry of the various steroidogenic enzymes and cofactors and the genes that encode them. The first and rate-limiting step in steroidogenesis is the conversion of cholesterol to pregnenolone by a single enzyme, P450<sub>scc</sub> (CYP11A1), but this enzymatically complex step is subject to multiple regulatory mechanisms, yielding finely tuned quantitative regulation. Qualitative regulation determining the type of steroid to be produced is mediated by many enzymes and cofactors. Steroidogenic enzymes fall into two groups: cytochrome P450 enzymes and hydroxysteroid dehydrogenases. A cytochrome P450 may be either type 1 (in mitochondria) or type 2 (in endoplasmic reticulum), and a hydroxysteroid dehydrogenase may belong to either the aldo-keto reductase or short-chain dehydrogenase/reductase families. The activities of these enzymes are modulated by posttranslational modifications and by cofactors, especially electron-donating redox partners. The elucidation of the precise roles of these various enzymes and cofactors has been greatly facilitated by identifying the genetic bases of rare disorders of steroidogenesis. Some enzymes not principally involved in steroidogenesis may also catalyze extraglandular steroidogenesis, modulating the phenotype expected to result from some mutations. Understanding steroidogenesis is of fundamental importance to understanding disorders of sexual differentiation, reproduction, fertility, hypertension, obesity, and physiological homeostasis. (*Endocrine Reviews* 32: 81–151, 2011)

- I. Introduction
- II. Cholesterol Uptake, Storage, and Intracellular Transport
  - A. Delivery of cholesterol to mitochondria
  - B. Disorders of cholesterol synthesis and trafficking
- III. An Overview of Steroidogenic Enzymes
  - A. Cytochrome P450
  - B. Hydroxysteroid dehydrogenases
- IV. The Steroidogenic Acute Regulatory Protein
  - A. Acute regulation of steroidogenesis
  - B. StAR structure and mechanism of action
  - C. Disorders of StAR: classic and nonclassic congenital lipid adrenal hyperplasia
- V. Conversion of Cholesterol to Pregnenolone: P450<sub>scc</sub> and Its Electron Transfer Proteins
  - A. P450<sub>scc</sub>
  - B. P450<sub>scc</sub> deficiency
  - C. Chronic maintenance of the steroidogenic machinery
  - D. Transport of electrons to P450<sub>scc</sub>: ferredoxin reductase and ferredoxin
  - E. Ferredoxin reductase
  - F. Ferredoxin
- VI. 3 $\beta$ -Hydroxysteroid Dehydrogenase/ $\Delta^5 \rightarrow \Delta^4$  Isomerase
  - A. 3 $\beta$ -Hydroxysteroid dehydrogenase deficiency
- VII. P450<sub>c17</sub>: 17 $\alpha$ -Hydroxylase/17,20-Lyase

Abbreviations: ABS, Antley-Bixler syndrome; ACAT, acyl-CoA:cholesterol acyltransferase; AHC, adrenal hypoplasia congenita; AKR, aldo-keto reductase; ALD, adrenoleukodystrophy; Allo, allopregnanolone; AME, apparent mineralocorticoid excess; APS, adenosine phosphosulfate; CAH, congenital adrenal hyperplasia; CMO, corticosterone methyl oxidase; CNS, central nervous system; CoA, coenzyme A; CYP, cytochrome P450; DHEA, dehydroepiandrosterone; DHEAS, DHEA sulfate; DHT, dihydrotestosterone; DOC, 11-deoxycorticosterone; E, embryonic day; EDS, Ehlers-Danlos syndrome; ENaC, amiloride-sensitive epithelial sodium channel; FAD, flavin adenine dinucleotide; FGD, familial glucocorticoid deficiency; FMN, flavin mononucleotide; GABA,  $\gamma$ -amino butyric acid; GR, glucocorticoid receptor; GRA, glucocorticoid-remediable aldosteronism; hCG, human chorionic gonadotropin; HLA, human lymphocyte antigen; H6PHD, hexose-6-phosphate dehydrogenase; HSD, hydroxysteroid dehydrogenase; HSL, hormone-sensitive lipase; IMM, inner mitochondrial membrane; LDL, low-density lipoprotein; MC2R, melanocortin receptor type 2; MLN64, metastatic lymph node clone 64; MRAP, melanocortin receptor accessory protein; NAD(P)(H), nicotinamide adenine dinucleotide (phosphate) (reduced form); 17OHP, 17-hydroxyprogesterone; OMM, outer mitochondrial membrane; PAPS, 3'-phosphoadenosine-5'-phosphosulfate; PAPSS, PAPS synthase; PHA, pseudohypoadosteronism; POR, P450 oxidoreductase; RODH/CRAD, retinol dehydrogenase/cis-retinol/androgen dehydrogenase; SDR, short-chain dehydrogenase/reductase; SF1, steroidogenic factor 1; SREBP, sterol response element binding protein; StAR, steroidogenic acute regulatory protein; StarD, StAR-related lipid transfer domain; SULF, sulfotransferase; TIM, triosephosphate isomerase.

ISSN Print 0021-972X ISSN Online 1945-7197

Printed in U.S.A.

Copyright © 2011 by The Endocrine Society

doi: 10.1210/er.2010-0013 Received June 2, 2010. Accepted August 20, 2010.

First Published Online November 4, 2010

- A. Transcriptional regulation of the human *CYP17A1* gene encoding P450c17
- B. 17 $\alpha$ -Hydroxylase/17,20-lyase deficiency
- C. Isolated 17,20-lyase deficiency
- VIII. Electron Transport: P450 Oxidoreductase and Cytochrome *b<sub>5</sub>*
  - A. P450 oxidoreductase
  - B. P450 oxidoreductase deficiency
  - C. Cytochrome *b<sub>5</sub>*
- IX. P450c21: Steroid 21-Hydroxylase
  - A. CYP21 genes and the genetics of 21-hydroxylase deficiency
  - B. 21-Hydroxylase deficiency
  - C. Molecular genetics of 21-hydroxylase deficiency
- X. Isozymes of P450c11: P450c11 $\beta$  and P450c11AS
  - A. Isozymes of P450c11
  - B. Overview of lesions in isozymes of P450c11
  - C. 11 $\beta$ -Hydroxylase deficiency
  - D. Aldosterone synthase deficiencies
  - E. Glucocorticoid-remediable aldosteronism
- XI. Isozymes of 17 $\beta$ -Hydroxysteroid Dehydrogenase
  - A. 17 $\beta$ HSD type 1
  - B. 17 $\beta$ HSD type 2
  - C. 17 $\beta$ HSD type 3
  - D. 17 $\beta$ HSD type 4
  - E. 17 $\beta$ HSD type 5
  - F. 17 $\beta$ HSD type 6
- XII. P450aro: Aromatase
- XIII. Isozymes of 5 $\alpha$ -Reductase
- XIV. Isozymes of 3 $\alpha$ -Hydroxysteroid Dehydrogenase
- XV. Isozymes of 11 $\beta$ -Hydroxysteroid Dehydrogenase
  - A. Lesions in 11 $\beta$ HSD1—apparent cortisone reductase deficiency
  - B. Lesions in 11 $\beta$ HSD2—apparent mineralocorticoid excess
- XVI. Steroid Sulfatase and Sulfotransferases
- XVII. Other Genetic Adrenal Disorders Associated with Steroidogenesis
  - A. Adrenal hypoplasia congenita
  - B. ACTH resistance syndromes
  - C. Familial glucocorticoid resistance
  - D. Pseudohypoaldosteronism
- XVIII. Tissue-Specific Pathways of Steroidogenesis
  - A. Adrenal pathways
  - B. Gonadal pathways
  - C. The “backdoor pathway” to dihydrotestosterone
  - D. Neurosteroids: steroid synthesis in the brain
- XIX. Fetoplacental Steroidogenesis
  - A. The fetal adrenal
  - B. Placental steroidogenesis
- XX. Adrenarche

## I. Introduction

**S**teroid hormones regulate a wide variety of developmental and physiological processes from fetal life to adulthood. Steroid hormones are all synthesized from cholesterol and hence have closely related structures based on the classic cyclopentanophenanthrene 4-ring structure

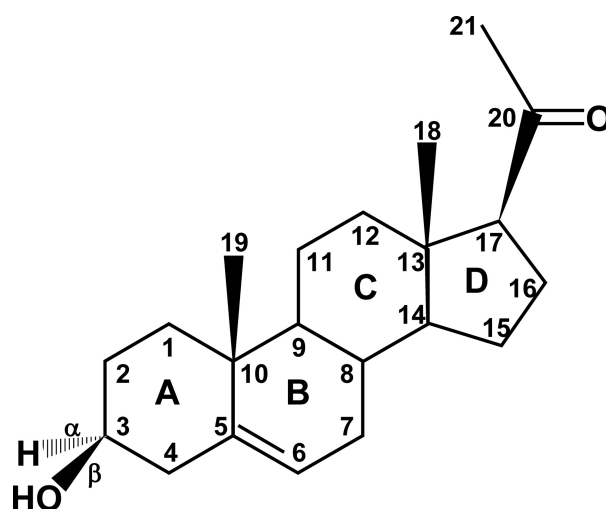

**FIG. 1.** Structure of pregnenolone, illustrating the cyclopentanophenanthrene structure common to all steroids. The carbon atoms are indicated by *numbers*, and the rings are designated by *letters* according to standard convention. Substituents and hydrogens are labeled as  $\alpha$  or  $\beta$  if they are positioned behind or in front of the plane of the page, respectively. Pregnenolone is derived from cholesterol, which has a six-carbon side chain attached to carbon no. 20. Pregnenolone is a “ $\Delta^5$  compound,” having a double bond between carbons no. 5 and 6; the action of 3 $\beta$ -hydroxysteroid dehydrogenase/isomerase moves this double bond from the B ring to carbons 4 and 5 in the A ring, forming  $\Delta^4$  compounds. Most of the major biologically active steroid hormones are  $\Delta^4$  compounds. [© R. J. Auchus.]

(Fig. 1). These structures were painstakingly determined in the 1930s (1, 2), and precursor/product relationships were identified, leading to the general understanding of the pathways of steroidogenesis. Isolation of some key steroidogenic enzymes from animal sources and the cloning of many of their cDNAs and genes in the 1980s showed that there were fewer steroidogenic enzymes than there were steroidogenic reactions and that, in most cases, a particular steroidogenic reaction was catalyzed by the same enzyme in all tissues, dramatically revising the views derived from steroid chemistry alone; this revolution in the understanding of steroidogenesis was reviewed in 1988 (3). The ensuing 23 yr have witnessed major developments in four areas of steroidogenesis: 1) the cloning of the steroidogenic acute regulatory protein (StAR) and subsequent study of the mechanisms of intracellular cholesterol transport; 2) the expanding array of hydroxysteroid dehydrogenases (HSDs); 3) the expanding roles of electron transfer proteins and other cofactors in disease; and 4) the elucidation of additional pathways of steroidogenesis in classical and extraglandular tissues. All have added substantial complexity and subtlety to the understanding of molecular steroidogenesis. Different physiological categories of steroids (androgens, estrogens, and later mineralocorticoids and glucocorticoids) were recognized more than 70 yr ago (4), but despite efforts to correlate steroid structures with their activities, this area was not under-

**TABLE 1.** Physical characteristics of human genes encoding steroidogenic enzymes

| Enzyme                          | Gene           | Gene size (kb) | Chromosomal location | Exons (n) | mRNA size (kb)     |
|---------------------------------|----------------|----------------|----------------------|-----------|--------------------|
| StAR                            | <i>STAR</i>    | 8              | 8p11.2               | 8         | 1.6                |
| P450 <sub>scc</sub>             | <i>CYP11A1</i> | 30             | 15q23-q24            | 9         | 2.0                |
| P450 <sub>c11β</sub>            | <i>CYP11B1</i> | 9.5            | 8q21-22              | 9         | 4.2                |
| P450 <sub>c11AS</sub>           | <i>CYP11B2</i> | 9.5            | 8q21-22              | 9         | 4.2                |
| P450 <sub>c17</sub>             | <i>CYP17A1</i> | 6.6            | 10q24.3              | 8         | 1.9                |
| P450 <sub>c21</sub>             | <i>CYP21A2</i> | 3.4            | 6p 21.1              | 10        | 2.0                |
| P450 <sub>aro</sub>             | <i>CYP19A1</i> | 130            | 15q21.1              | 10        | 1.5–4.5            |
| 3βHSD1                          | <i>HSD3B1</i>  | 8              | 1p13.1               | 4         | 1.7                |
| 3βHSD2                          | <i>HSD3B2</i>  | 8              | 1p13.1               | 4         | 1.7                |
| 11βHSD1                         | <i>HSD11B1</i> | 7              | 1q32-q41             | 6         | 1.6                |
| 11βHSD2                         | <i>HSD11B2</i> | 6.2            | 16q22                | 5         | 1.6                |
| 17βHSD1                         | <i>HSD17B1</i> | 3.3            | 17q11-q21            | 6         | 1.4, 2.4           |
| 17βHSD2                         | <i>HSD17B2</i> | 63             | 16q24.1-q24.2        | 5         | 1.5                |
| 17βHSD3                         | <i>HSD17B3</i> | 67             | 9q22                 | 11        | 1.2                |
| 17βHSD6 (RODH)                  | <i>HSD17B6</i> | 24.5           | 12q13                | 5         | 1.6                |
| AKR1C1                          | <i>AKR1C1</i>  | 14.3           | 10p14-p15            | 9         | 1.2                |
| AKR1C2                          | <i>AKR1C2</i>  | 13.8           | 10p14-p15            | 9         | 1.3                |
| AKR1C3                          | <i>AKR1C3</i>  | 13.0           | 10p14-p15            | 9         | 1.2                |
| AKR1C4                          | <i>AKR1C4</i>  | 22.1           | 10p14-p15            | 9         | 1.2                |
| 5α-Reductase 1                  | <i>SRD5A1</i>  | 36             | 5p15                 | 5         | 2.4                |
| 5α-Reductase 2                  | <i>SRD5A2</i>  | 56             | 2p23                 | 5         | 2.4                |
| SULT2A1                         | <i>SULT2A1</i> | 17             | 19q13.3              | 6         | 2.0                |
| PAPSS2                          | <i>PAPSS2</i>  | 85             | 10q24                | 13        | 3.9                |
| P450-oxidoreductase             | <i>POR</i>     | 69             | 7q11.2               | 16        | 2.5                |
| Ferredoxin                      | <i>FDX1</i>    | 35             | 11q22                | 5         | 1.0, 1.4, 1.7, 3.2 |
| Ferredoxin reductase            | <i>FDXR</i>    | 11             | 17q24-q25            | 12        | 2.0                |
| Cytochrome <i>b<sub>5</sub></i> | <i>CYB5A</i>   | 32             | 18q23                | 5         | 0.9                |
| H6PDH                           | <i>H6PD</i>    | 36.5           | 1p36                 | 5         | 9.1                |

© R. J. Auchus and W. L. Miller.

stood until the various steroid hormone receptors were identified and cloned (5–10). Thus, the contemporary definition of each class of steroid is based on the receptor(s) to which it binds, rather than on the chemical structure of the steroid.

Substantially more study has been devoted to steroid hormone action than to steroid hormone synthesis, partly because steroids are such widely used drugs and partly because disorders of steroid hormone synthesis were formerly thought to be confined to rare genetic lesions. Work in the past 30 yr has identified the steroidogenic enzymes and their genes (Table 1), reinvigorating studies of steroid biosynthesis by discoveries of roles for altered regulation of steroidogenesis in common disorders such as hypertension and the polycystic ovary syndrome and by discoveries of steroid-modifying enzymes in target tissues that mediate some forms of apparent tissue specificity of hormone action. Thus, the study and understanding of steroidogenesis is germane to broad areas of medicine, physiology, and pharmacology.

## II. Cholesterol Uptake, Storage, and Intracellular Transport

The human adrenal can synthesize cholesterol *de novo* from acetate (11), but most of its supply of cholesterol

comes from plasma low-density lipoproteins (LDLs) derived from dietary cholesterol (12). By contrast, rodent adrenals derive most of their cholesterol from high-density lipoproteins via a receptor termed scavenger receptor B1, but this pathway appears to play a minor role in human steroidogenesis (Fig. 2). The intracellular cholesterol economy is largely regulated by the sterol response element binding protein (SREBPs), a group of transcription factors that regulate genes involved in the biosynthesis of cholesterol and fatty acids (13). Adequate concentrations of LDL will suppress 3-hydroxy-3-methylglutaryl co-enzyme A reductase, the rate-limiting enzyme in cholesterol synthesis. ACTH also stimulates the activity of 3-hydroxy-3-methylglutaryl co-enzyme A reductase, LDL receptors, and uptake of LDL cholesterol. LDL cholesterol esters are taken up by receptor-mediated endocytosis, and are then stored directly or converted to free cholesterol and used for steroid hormone synthesis (14). Cholesterol can be esterified by acyl-coenzyme A (CoA):cholesterol acyltransferase (ACAT), stored in lipid droplets, and accessed by activation of hormone-sensitive lipase (HSL). ACTH stimulates HSL and inhibits ACAT, thus increasing the availability of free cholesterol for steroid hormone synthesis. Cholesterol ester hydrolase and neutral cholesterol ester hydrolase also hydrolyze cytosolic cholesterol esters, but

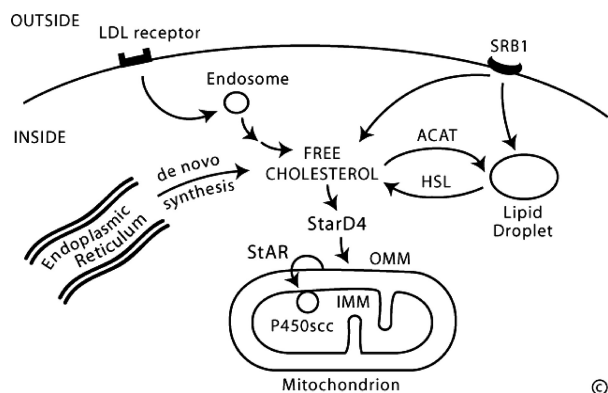

**FIG. 2.** Principal features of the cellular cholesterol economy. Human cells typically pick up circulating LDLs through receptor-mediated endocytosis, directing the cholesterol to endosomes. Rodent cells pick up high-density lipoproteins via scavenger receptor B1 (SRB1) and direct it to lipid droplets. Cholesterol can also be synthesized *de novo* from acetate in the endoplasmic reticulum. Irrespective of source, cholesterol can be esterified by ACAT and stored in lipid droplets as cholesterol esters. Free cholesterol, produced by the action of HSL, may be bound by StarD4 for transcytoplasmic transport to membrane destinations, including the OMM. In the adrenals and gonads, StAR is responsible for the rapid movement of cholesterol from the OMM to the IMM, where it can be taken up by the cholesterol side-chain cleavage enzyme, P450scc, and converted to pregnenolone. [© W. L. Miller.]

the relative contributions of these three enzymes are not known (15).

### A. Delivery of cholesterol to mitochondria

The first step in steroidogenesis takes place within mitochondria. The mechanisms by which cholesterol is transported to and loaded into the outer mitochondrial membrane (OMM) remain an active area of research (16, 17). StAR (see Section IV.A), which governs the acute steroidogenic response to tropic stimuli, appears to contribute to this step in a minor fashion; the principal action of StAR is to facilitate the movement of cholesterol from the OMM to the inner mitochondrial membrane (IMM). StAR is the first-described member of a family of proteins that contain so-called START (StAR-related lipid transfer) domains, which are found in most metazoan organisms (18). Fifteen START domain (StarD) proteins appear to serve roles in binding and mediating the intracellular transfer of lipids in mammals (19). StarD4 and StarD5 may play roles in moving cholesterol from intracellular lipid droplets to the OMM, but knockout of the gene for StarD4 in mice does not disrupt steroidogenesis (20).

Free cholesterol is nearly insoluble (critical micellar concentration, ~25–40 nM) (21). Some cholesterol may be incorporated into vesicular membranes that then fuse with other membranes, thus delivering cholesterol from one intracellular compartment to another, but this appears to be a minor pathway (22). Instead, cholesterol is

solubilized by binding to proteins. Early work focused on sterol-carrier protein 2 (SCP-2) and its homolog, SCP-x, but these appear to be nonspecific lipid binding and transfer proteins that play a minor role in the intracellular cholesterol economy (23). Analysis of SREBP-responsive transcripts identified a group of proteins termed StarD4, -5, and -6 that are structurally related to StAR, and appear to play major roles in intracellular cholesterol transport (19). These proteins have closely related cDNA, gene, and protein structures (24). The crystal structure of one of these, StarD4 (25), is essentially the same as the StAR-like domain of a protein called MLN64 (metastatic lymph node clone 64) (26). StarD4, -5, and -6 lack signal sequences that target them to specific subcellular organelles; hence, they appear to be confined to the cytoplasm, where they bind insoluble lipids, permitting the lipid to be transported across aqueous cytosol. Mouse StarD4 (but not StarD5) is regulated by SREBP, and both StarD4 and D5 can exert low levels of StAR-like activity in COS-1 cells cotransfected with the cholesterol side-chain cleavage enzyme system (27). By contrast, StarD6, which appears to be confined to the male germ line, has greater StAR-like activity than StAR itself (28). Thus, the current view is that the family of proteins related to StarD4 are responsible for delivering cholesterol to the OMM from elsewhere in the cell (lipid droplets, endoplasmic reticulum) in most cell types, whereas StAR itself is responsible for delivery from the OMM to the IMM, but only acts in steroidogenic cells.

### B. Disorders of cholesterol synthesis and trafficking

There are several genetic disorders in these early steps in steroidogenesis, including adrenoleukodystrophy (ALD) (Schilder disease) and disorders of cholesterol synthesis and metabolism (*e.g.*, Wolman disease, cholesterol ester storage disease, and Smith-Lemli-Opitz syndrome). These diseases typically cause primary adrenal insufficiency. Their impact on fetoplacental development is ameliorated by transplacental cholesterol delivered from the mother (29).

#### 1. Adrenoleukodystrophy

ALD is a relatively common metabolic disorder causing adrenal failure. The prevalence of ALD is probably between 1:20,000 and 1:100,000, although the overall frequency may be as high as 1:17,000 (30). Most cases are caused by mutations in the gene encoding the peroxisomal membrane protein ALDP (*ABCD1*, Xq28) (31, 32), which belongs to the superfamily of ATP-binding cassette transporters. There is also a rare autosomal recessive form that usually presents in infancy. ALDP imports activated very long chain fatty acid acyl-CoA derivatives into peroxisomes where they are shortened by  $\beta$ -oxidation (33, 34).



ALD is thus characterized by high ratios of C<sub>26</sub> to C<sub>22</sub> very long chain fatty acids in plasma and tissues, permitting accurate diagnosis (35). Carriers can usually be detected by very long chain fatty acid screening, although genetic analysis may be necessary in some cases. X-linked ALD commonly becomes symptomatic in midchildhood, and its variant, adrenomyeloneuropathy, presents in adulthood (36). The same ALDP mutation can cause both ALD and adrenomyeloneuropathy; hence, it is likely that other genetic loci are also involved (37). There is central nervous system (CNS) leukodystrophy causing behavioral changes and diminishing intellectual function progressing to severe dementia. Symptoms of adrenal insufficiency may appear before or after the brain symptoms (30, 38, 39). Adrenomyeloneuropathy typically begins with adrenal insufficiency in childhood and adolescence, and signs of neurological disease follow 10 to 15 yr later. Therapeutic options are limited, centering on hematopoietic stem cell transplantation for early cerebral disease and statin drugs (30, 34).

## 2. Wolman disease

Wolman disease (primary xanthomatosis) and cholesterol ester storage disease are disorders of lysosomal acid lipase (cholesterol esterase) that hydrolyze cholesterol esters in lysosomes (40). Mutations in the *LIPA* gene encoding this enzyme cause Wolman disease (41). Because insufficient free cholesterol is available to P450<sub>scc</sub>, there is adrenal insufficiency. The disease is less severe than congenital lipoid adrenal hyperplasia (lipoid CAH) with respect to steroidogenesis, but because all cells store and utilize cholesterol, it affects all tissues and is fatal. Cholesterol ester storage disease appears to be a rare, milder allelic defect in the same enzyme.

## 3. Smith-Lemli-Opitz syndrome

Smith-Lemli-Opitz syndrome is a defect in cholesterol biosynthesis, resulting from abnormalities in the sterol  $\Delta^7$ -reductase gene, *DHCR7* (42). Associated features of this condition include microcephaly, developmental delay, a typical facial appearance, proximal thumbs, syndactyly of the second and third toes, cardiac abnormalities, and underdeveloped genitalia in males. Adrenal insufficiency is present in some children, especially during times of stress or when LDL-derived cholesterol sources are inadequate (*e.g.*, dietary insufficiency/bile salt depletion) (43).

# III. An Overview of Steroidogenic Enzymes

Most enzymes involved in steroid biosynthesis are either cytochrome P450s (CYPs) or HSDs. These steroidogenic

enzymes are functionally, if not absolutely, unidirectional, so the accumulation of products does not drive flux back to the precursor. All P450-mediated hydroxylations and carbon-carbon bond cleavage reactions are mechanistically and physiologically irreversible (44). HSD reactions are mechanistically reversible and can run in either direction under certain conditions *in vitro*, but each HSD drives steroid flux predominantly in either the oxidative or reductive mode *in vivo* (45). However, two or more HSDs drive the flux of a hydroxysteroid and its cognate ketosteroid in opposite directions, some favoring ketosteroid reduction and others favoring hydroxysteroid oxidation.

## A. Cytochrome P450

Cytochrome P450 is a generic term for a group of oxidative enzymes, all of which have about 500 amino acids and contain a single heme group (46). They are termed P450 (pigment 450) because all absorb light at 450 nm in their reduced states complexed with carbon monoxide. The human genome includes genes for 57 cytochrome P450 enzymes (47, 48). Several nomenclature systems have been proposed for these genes and enzymes over the past few decades. The genes are now formally termed *CYP* genes, and a logical systematic nomenclature for these has been described (<http://drnelson.uthsc.edu/cytochromeP450.html>); the encoded proteins may be given the same name without the use of italics (thus the *CYP11A1* gene encodes CYP11A1), but the classic, more widely understood P450 names for the proteins are preferable (thus the *CYP11A1* gene encodes P450<sub>scc</sub>, where the suffix “scc” denotes “side chain cleavage,” thus identifying the principal activity of the enzyme). The formal gene names are given in Table 1. Seven human cytochrome P450 enzymes are targeted to the mitochondria and are termed “type 1”; the other 50 human P450 enzymes are targeted to the endoplasmic reticulum and are termed “type 2.” All P450 enzymes activate molecular oxygen using their heme center and add electrons from the reduced form of nicotinamide adenine dinucleotide phosphate (NADPH). The two types of P450 enzymes are distinguished biochemically by the mechanisms by which they receive electrons from NADPH, as well as by their intracellular locations. Type 1 enzymes receive electrons from NADPH via a flavoprotein termed ferredoxin reductase and a small iron-sulfur protein termed ferredoxin, whereas type 2 P450 enzymes receive electrons from NADPH via a single 2-flavin protein termed P450 oxidoreductase (POR) (49). Each P450 enzyme can metabolize multiple substrates, catalyzing a broad array of oxidations.

Six P450 enzymes are involved in steroidogenesis (Fig. 3). Mitochondrial P450<sub>scc</sub> is the cholesterol side-chain cleavage enzyme catalyzing the series of reactions formerly termed “20,22 desmolase.” The two isozymes of mito-



**TABLE 2.** Properties of HSDs

| Features             | AKRs                                  | SDRs              |
|----------------------|---------------------------------------|-------------------|
| Quaternary structure | Monomers                              | Dimers, tetramers |
| Subunit size (kDa)   | ~35                                   | 25–35             |
| Structural motif     | TIM- ( $\beta$ -)barrel               | Rossmann fold     |
| Catalytic motif      | Y, K, H, D distant in linear sequence | Y-X-X-X-K motif   |

TIM, Triosephosphate isomerase. © R. J. Auchus.

mainly use NADPH to reduce ketosteroids to hydroxysteroids. Although these enzymes are typically bidirectional *in vitro* based on pH and cofactor concentrations, they tend to function mainly in one direction in intact cells, with the direction determined by the cofactor(s) available (45, 50). These directional preferences derive primarily from the relative abundance of the oxidized and reduced form of cofactors and the relative affinity of each enzyme for NAD(H) *vs.* NADP(H), because cofactor concentrations exceed steroid concentrations by many orders of magnitude (45, 51). Consequently, the directional preference of some “reductive” enzymes can be reduced or reversed by depleting cells of NADPH or by mutations that impair NADPH binding (52, 53).

#### IV. The Steroidogenic Acute Regulatory Protein

##### A. Acute regulation of steroidogenesis

Unlike cells that produce polypeptide hormones, which store large amounts of hormone in secretory vesicles ready for rapid release, steroidogenic cells store very little steroid. Thus, a rapid steroidogenic response (*e.g.*, adrenal secretion of aldosterone and cortisol in response to stress or the “pulsing” of sex steroids in response to an LH surge) requires rapid synthesis of new steroid. ACTH promotes steroidogenic cell growth and maintains the steroidogenic machinery at three distinct levels (LH probably acts similarly on gonadal steroidogenic cells, but has not been studied as thoroughly). First, acting over weeks or months, as seen in long-term exposure to ACTH (*e.g.*, in Cushing’s disease), ACTH promotes adrenal growth. This growth occurs primarily by ACTH stimulating the production of cAMP, which in turn promotes the synthesis of IGF-II (54, 55), basic fibroblast growth factor (56), and epidermal growth factor (57). Together, these growth factors stimulate adrenal cellular hypertrophy and hyperplasia, determining the amount of steroidogenic tissue. Second, acting over days, ACTH acts through cAMP, and angiotensin II acts through the calcium/calmodulin pathway to promote the transcription of genes encoding various steroidogenic enzymes and electron-donating cofactor proteins, thus de-

termining the amount of steroidogenic machinery in the cell. Third, ACTH rapidly stimulates StAR gene transcription (58) and phosphorylation of Ser195 in extant StAR (59) to increase the flow of cholesterol from the OMM to the IMM, where it becomes substrate for the first and rate-limiting enzyme, P450<sub>scc</sub>. This acute response occurs within minutes and is inhibited by inhibitors of protein synthesis (*e.g.*, puromycin or cycloheximide), indicating that a short-lived protein species mediates this process. Orme-Johnson and colleagues (60–62) first showed that this acute steroidogenic response was accompanied by the rapid synthesis of a 37-kDa phosphoprotein. Stocco and Sodeman (63) extended these observations to MA-10 cells and cloned this factor, which they named the “steroidogenic acute regulatory protein,” or StAR (64). The history of the discovery of StAR as this long-sought acute trigger of steroidogenesis has been reviewed elsewhere (65). Although other proteins are involved in the chronic replenishment of mitochondrial cholesterol, abundant biochemical, clinical, and genetic evidence implicates StAR as this labile protein mediator (65).

Some steroidogenesis is independent of StAR; when nonsteroidogenic cells are transfected with the P450<sub>scc</sub> system, they convert cholesterol to pregnenolone at about 14% of the StAR-induced rate (66, 67). Furthermore, the placenta utilizes mitochondrial P450<sub>scc</sub> to initiate steroidogenesis (68) but does not express StAR (69). The mechanism of StAR-independent steroidogenesis is unclear; it may occur without a triggering protein, or some other protein may exert StAR-like activity to promote cholesterol flux, but without StAR’s rapid kinetics. A candidate for such a protein is MLN64, a 445-amino acid protein cloned from metastatic breast carcinoma, which has 227 carboxyl-terminal amino acids that are 37% identical and about 50% similar to the sequence of StAR (70). Intact MLN64 lacks StAR-like activity, but deleting the amino-terminal 218 residues produces a protein that closely resembles StAR and has about half of StAR’s ability to promote steroidogenesis, both in transfected cells and when purified and added to steroidogenic mitochondria *in vitro* (71, 72). MLN64 is expressed in the placenta where its amino-terminal domain is cleaved off, suggesting that an N-terminally deleted form of MLN64 may substitute for StAR in the placenta (72).

StAR is synthesized as a 37-kDa protein that has a typical mitochondrial leader sequence that directs it to the mitochondrion and is cleaved off upon mitochondrial entry to yield a 30-kDa intramitochondrial protein. Overexpression of mouse StAR in mouse Leydig MA-10 cells increased their basal steroidogenic rate (64), and cotransfection of expression vectors for both StAR and the P450<sub>scc</sub> system in nonsteroidogenic COS-1 cells aug-



mented pregnenolone synthesis above that obtained with the P450<sub>scc</sub> system alone (66). Mutations in StAR cause the most common form of lipoid CAH (66, 67), in which very little steroid is made; and targeted disruption of the mouse *Star* gene causes a similar phenotype (73, 74).

### B. StAR structure and mechanism of action

The mechanism of StAR's action has been studied extensively but remains incompletely understood (17, 75, 76). The short half-life of the 37-kDa cytoplasmic precursor and the longer half-life of the "mature" 30-kDa intra-mitochondrial form of StAR initially suggested that the 30-kDa form was the biologically active moiety. When expressed in cytoplasm or added to mitochondria *in vitro*, both the 37- and 30-kDa forms of StAR are equally active (77). When StAR is immobilized on the OMM, it is constitutively active, but StAR is inactive when localized to the mitochondrial intramembranous space or to the matrix (78). These data demonstrate that StAR acts exclusively on the OMM (77, 78), and its activity in promoting steroidogenesis is proportional to its residency time on the OMM (78). Thus, it is StAR's cellular localization, not its cleavage, that determines whether or not it is active. StAR has a sterol-binding pocket that accommodates a single molecule of cholesterol (26). The interaction of StAR with the OMM involves conformational changes (79, 80) that are necessary for StAR to accept and discharge cholesterol molecules. Although StAR can transfer cholesterol between synthetic membranes *in vitro* (81), suggesting that other protein molecules are not needed for its action, this activity can also be seen with the inactive mutant R182L, which is biologically inactive and causes lipoid CAH (82). Thus StAR's action to promote steroidogenesis is distinct from its cholesterol-transfer activity.

Substantial data indicate that the action of StAR also requires the translocator protein, TSPO (also known as the peripheral benzodiazepine receptor) on the OMM (83–85). StAR appears to interact with peripheral benzodiazepine receptor (84), voltage-dependent anion channel 1, and phosphate carrier protein (86), all proteins found on the OMM. Each molecule of StAR appears to be recycled, moving hundreds of molecules of cholesterol before the cleavage/inactivation event (87). Although StAR is required for the acute steroidogenic response, steroidogenesis persists in the absence of StAR at about 14% of the StAR-induced rate (67, 75), accounting for the steroidogenic capacity of tissues that lack StAR (*e.g.*, the placenta and the brain). Biophysical and partial proteolysis studies indicate that residues 63–193 of StAR (*i.e.*, the domain that does not contain most of the crucial residues identified by missense mutations) are protease-resistant and constitute a "pause-transfer" sequence, which permits the bio-

active loosely folded carboxy-terminal molten globule domain to have increased interaction with the OMM (79).

The sequence of mouse (64) and human (69) StAR initially suggested that it had a novel structure. However, the carboxy-terminal 227 amino acids of MLN64 are 37% identical and about 50% similar to the sequence of StAR (70), and N-218 MLN64 has about half of the ability of StAR to promote steroidogenesis (71, 72). MLN64, a related protein called MENTHO (88, 89), and the NPC proteins disordered in Niemann-Pick type C disease act in the trafficking of cholesterol in peroxisomes and lipid droplets (90). Although the structure of StAR has not been determined directly, a crystal structure at 2.2 Å resolution was determined for N-216 MLN64, which corresponds to N-62 StAR. The structure reveals a globular protein with an  $\alpha/\beta$  helix-grip fold and an elongated hydrophobic pocket measuring about 26 Å deep and 10 Å across at its widest diameter (26). Modeling suggested that N-216 MLN64 could accommodate a single molecule of cholesterol in this pocket, with the 3 $\beta$ -OH group coordinated by the two polar residues at the bottom of the pocket. This structure, the crystal structure of the closely related StarD4 protein (25) and several computational models of StAR (91–93) all feature two long  $\alpha$ -helices at the N and C termini, two short  $\alpha$ -helices, and a set of nine antiparallel  $\beta$ -sheets that form a helix-grip fold (Fig. 4A). The most notable feature is a hollow hydrophobic pocket that has appropriate dimensions and geometry to bind a single molecule of cholesterol. The pocket is defined primarily by the  $\beta$ -sheets and the C-helix, which forms its floor. The interior surface of the pocket contains only two hydrophilic residues, E169 and R188. If a cholesterol molecule is modeled in the pocket, these hydrophilic residues are perfectly positioned to coordinate with the 3 $\beta$ -hydroxyl group of cholesterol, and direct binding assays show that both N-218 MLN64 and N-62 StAR bind cholesterol with 1:1 stoichiometry (26). Only the exterior surface of the C-terminal  $\alpha$ -helix and small segments of the adjacent  $\Omega$ -loops appear to interact with the OMM to stimulate steroidogenesis (Fig. 4B). The  $\Omega$ -loops form hydrogen bonds with the C-terminal helix, prohibiting access of cholesterol to StAR's hydrophobic cholesterol binding pocket. The interaction with the charged phospholipids head groups on the OMM disrupts these hydrogen bonds, permitting the C-helix to swing open and closed, governing access of cholesterol to the sterol-binding pocket. Immobilizing the C-helix by forming disulfide bonds with the adjacent loops ablates activity, and disrupting such artificial disulfide bonds restores activity (80). Thus, the activity of StAR on the OMM requires an acid-induced disruption of hydrogen bonds and a consequent conformational change in StAR to permit it to bind and release cholesterol.



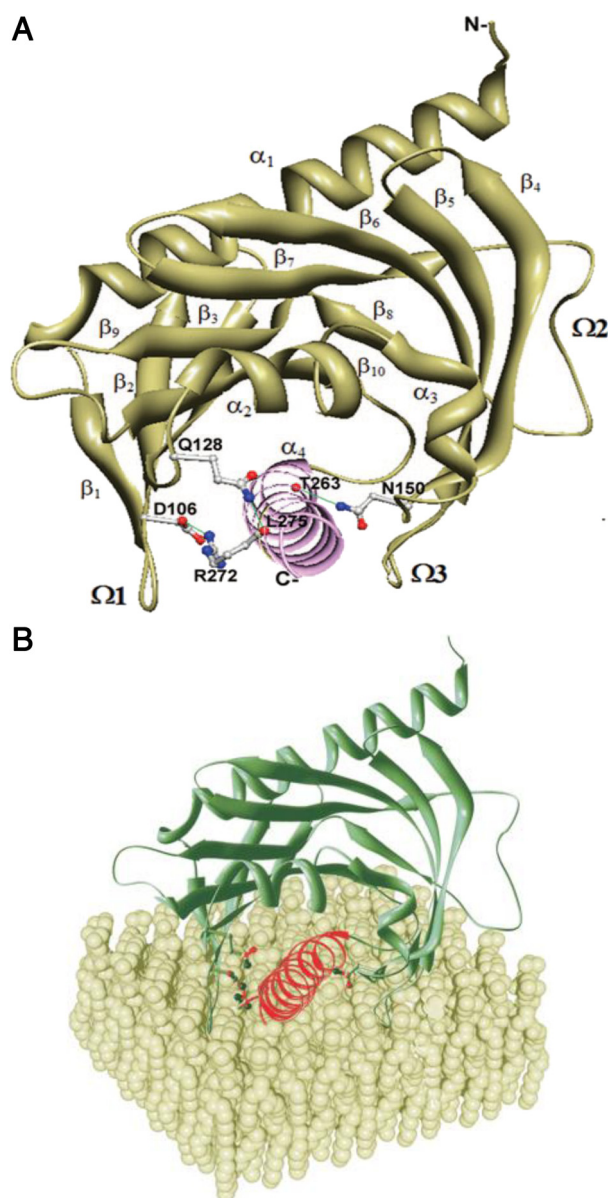

**FIG. 4.** Model of N-62 StAR. A, Ribbon diagram shows the N terminus in the upper right-hand corner; the C-terminal helix is in the lower center, extending out of the plane of the diagram. Residues that contribute to the associations between this C-terminal helix and adjacent structures are shown as ball-and-stick representations: carbon atoms are white; nitrogen, blue; oxygen, red; and hydrogen bonds, green. The principal associations involve the C-terminal helix residues Thr263 associating with Asn150, Arg272 associating with Asp106, and Leu275 associating with Gln128. [Reproduced with permission from D. C. Yaworsky *et al.*: *J Biol Chem* 280:2045–2054, 2005 (92). © American Society for Biochemistry and Molecular Biology.] B, Model showing StAR interacting with a membrane [Cover picture of Ref. 92].

### C. Disorders of StAR: classic and nonclassic congenital lipid adrenal hyperplasia

Lipoid CAH is the most severe genetic disorder of steroidogenesis, characterized by the absence of significant concentrations of all steroids, high basal ACTH and plasma renin activity, an absent steroidal response to long-term treatment with high doses of ACTH or human cho-

ronic gonadotropin (hCG), and grossly enlarged adrenals laden with cholesterol and cholesterol esters (94–97). These findings indicate a lesion in the first step in steroidogenesis—the conversion of cholesterol to pregnenolone. It was initially thought that the lesion was in an enzyme involved in this conversion, and before the role of P450<sub>scc</sub> was understood, lipoid CAH was misnamed “20,22-desmolase deficiency” (97–102). However, the gene for P450<sub>scc</sub> is normal in these patients (102), as are the mRNAs for adrenodoxin reductase and adrenodoxin (102). Furthermore, placental steroidogenesis persists in lipoid CAH, permitting normal term gestation, which would not be expected to happen if P450<sub>scc</sub> were involved (103). The normal P450<sub>scc</sub> system plus the accumulation of cholesterol esters in the affected adrenal suggested that the lesion lay in an upstream factor involved in cholesterol transport into mitochondria (102). The cloning of StAR permitted its study in patients with lipoid CAH, and the identification of disease-causing StAR mutations proved the indispensable role of StAR in adrenal and gonadal (but not placental) steroidogenesis (66, 67, 104).

Lipoid CAH is a StAR gene knockout experiment of nature, revealing the complex physiology of the StAR protein (105). StAR promotes steroidogenesis by increasing the movement of cholesterol into mitochondria, but in the absence of StAR, steroidogenic cells make steroids at about 14% of the StAR-induced level (66, 67, 75, 104). This observation led to the two-hit model of lipoid CAH (67) (Fig. 5). The first hit is the loss of StAR itself, leading to a loss of most, but not all steroidogenesis, leading to a compensatory rise in ACTH and LH. These hormones increase cellular cAMP, which increases biosynthesis of LDL receptors, their consequent uptake of LDL cholesterol, and *de novo* synthesis of cholesterol. In the absence of StAR, this increased intracellular cholesterol accumulates, causing the second hit, which is the loss of all steroidogenic capacity caused by mitochondrial and cellular damage resulting from the accumulated cholesterol, cholesterol esters, and their autooxidation products (67).

The two-hit model explains the unusual clinical findings in lipoid CAH. In the fetal testis, which normally makes large amounts of testosterone in fetal life (106), the Leydig cells are destroyed early in gestation, eliminating testosterone biosynthesis; hence, an affected 46,XY fetus does not undergo normal virilization and is born with female external genitalia and a blind vaginal pouch. However, Wolffian duct derivatives are well developed, indicating the presence of some testosterone synthesis early in fetal life (107), as predicted by the two-hit model. The undamaged Sertoli cells produce Müllerian inhibitory hormone, so that the phenotypically female 46,XY fetus has no cervix, uterus, or fallopian tubes. The steroido-

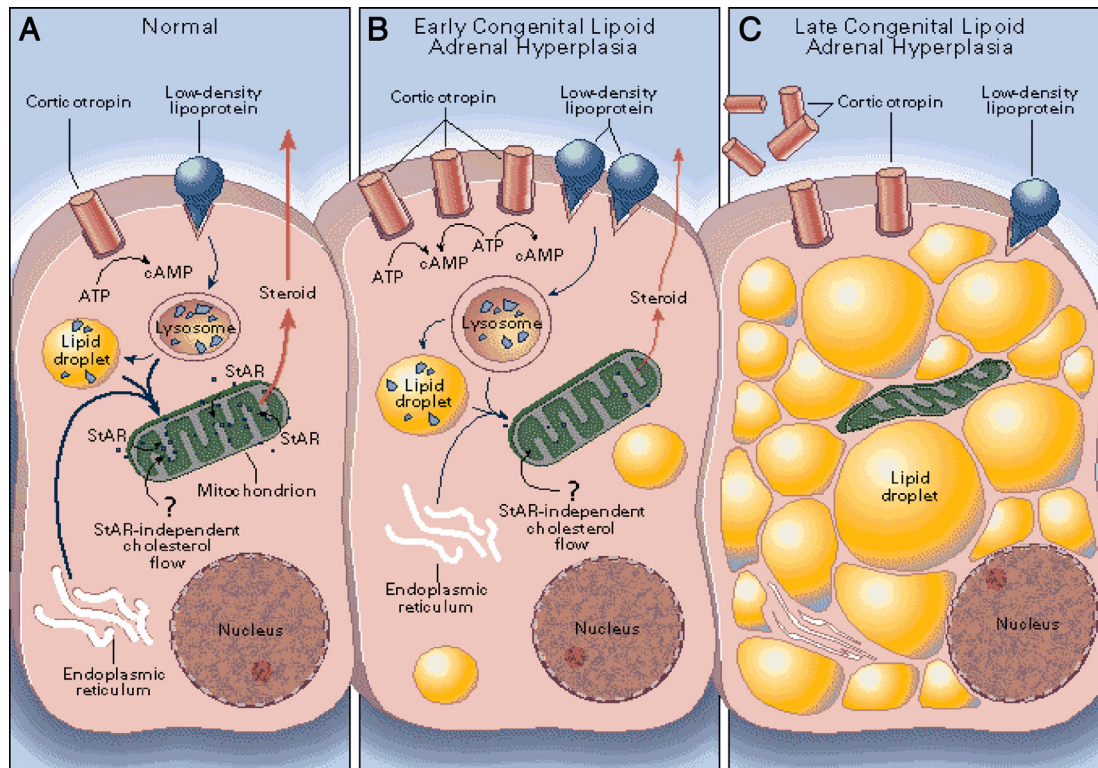

**FIG. 5.** Two-hit model of lipid CAH. A, In normal adrenal cells, cholesterol is derived by endogenous synthesis and from LDLs, as depicted in Fig. 2. The rate-limiting step in steroidogenesis is the flow of cholesterol from the OMM to the IMM, mediated by StAR. B, Early in lipid CAH, StAR-independent mechanisms still permit some cholesterol to enter the mitochondria; however, steroidogenesis is insufficient, and secretion of ACTH (and LH) increases, stimulating further accumulation of cholesterol esters in lipid droplets. C, The accumulating lipid droplets engorge and damage the cell through physical displacement and by the action of cholesterol autooxidation products. Steroidogenic capacity is destroyed, and secretion of tropic hormones continues. In the ovary, follicular cells remain unstimulated and undamaged until puberty, when they are recruited at the beginning of each cycle, and small amounts of estradiol are produced by StAR-independent means (as in panel B), causing partial feminization, anovulatory cycles, infertility, and hypergonadotropic hypogonadism. [Reprinted with permission from H. S. Bose, *et al.*: *N Engl J Med* 335:1870–1878, 1996 (67). © 1996 Massachusetts Medical Society. All rights reserved.]

genically active fetal zone of the adrenal is similarly affected, eliminating most dehydroepiandrosterone (DHEA) biosynthesis, and hence eliminating the fetoplacental production of estriol, so that midgestation maternal and fetal estriol levels are very low (103). The definitive zone of the fetal adrenal, which differentiates into the zona glomerulosa and fasciculata, normally produces very little aldosterone, and because fetal salt and water metabolism are primarily maintained by the placenta, stimulation of the glomerulosa by angiotensin II generally does not begin until birth. Consistent with this, many newborns with lipid CAH who have StAR mutations devoid of measurable function may not have a salt-wasting crisis until after several weeks of life, when chronic stimulation then leads to cellular damage (67, 108). Some mineralocorticoids may also be produced by StAR-independent steroidogenesis, further delaying the onset of salt loss in lipid CAH.

The two-hit model also explains the spontaneous feminization of affected 46,XX females who are treated in infancy and reach adolescence (109, 110). The fetal ovary makes little or no steroids and contains no detectable

mRNAs for the steroidogenic enzymes after the first trimester (106); consequently the ovary remains largely undamaged until it is stimulated by gonadotropins at the time of puberty, when it then produces some estrogen by StAR-independent steroidogenesis. Although the amount of estradiol produced is subnormal, in the absence of opposing action from adrenal androgens, it is sufficient to feminize an adolescent female. Continued stimulation results in cholesterol accumulation and cellular damage, so that biosynthesis of progesterone in the latter part of the cycle is impaired. Because gonadotropin stimulation only recruits individual follicles and does not promote steroidogenesis in the whole ovary, most follicles remain undamaged and available for future cycles. Cyclicity is determined by the hypothalamic-pituitary axis and remains normal. With each new cycle, a new follicle is recruited, and more estradiol is produced by StAR-independent steroidogenesis. Although net ovarian steroidogenesis is impaired, enough estrogen is produced to induce breast development (especially in the absence of androgens), feminization, monthly estrogen withdrawal, and cyclic vaginal bleeding (67, 109, 110). However, progesterone synthesis in the latter half of

the cycle is disturbed by the accumulating cholesterol esters so that the cycles are anovulatory. Measurements of estradiol, progesterone, and gonadotropins throughout the cycle in affected adult females with lipoid CAH confirmed this model (110). Similarly, examination of StAR-knockout mice confirms the two-hit model (74).

Numerous mutations in the *STAR* gene have been found in patients with lipoid CAH (67, 111). Lipoid CAH is relatively common in Japan; about 65–70% of affected Japanese alleles and virtually all affected Korean alleles carry the mutation Q258X (66, 67, 97, 111–113); this observation first identified the crucial role of the C-terminal helix in StAR's action. The carrier frequency for this mutation in these countries appears to be about one in 300 (67, 112) so that one in every 250,000 to 300,000 newborns is affected, for a total of about 500 patients in Japan and Korea. Other genetic clusters are found among Palestinian Arabs, most of whom carry the mutation R182L (67); in eastern Saudi Arabia, carrying R182H (108); and in parts of Switzerland, carrying the mutation L260P (114). Deletion of only 10 carboxy-terminal residues reduces StAR activity by half (77), and deletion of 28 carboxy-terminal residues by the common Q258X mutation eliminates all activity. By contrast, deletion of the first 62 amino-terminal residues has no effect on StAR activity assayed *in vitro*, although this deletes the entire mitochondrial leader sequence and forces StAR to remain in the cytoplasm (77).

Most patients with lipoid CAH have had similar clinical findings: an infant with normal-appearing female genitalia experiences failure to thrive and salt loss in the first weeks of life (67, 97, 111). However, other clinical presentations have been described, including apparent sudden infant death syndrome (115) and late initial presentation of salt loss at about 1 yr of age (108). Nonclassic lipoid CAH is an attenuated form of the disease caused by mutations that retain about 20–25% of normal StAR activity. Most of these patients carry StAR mutation R188C, although other mutations can cause this phenotype (116–118). These individuals generally experience mild symptoms of adrenal insufficiency at 2 to 4 yr of age, and 46,XY patients have normal-appearing external genitalia, indicating normal intrauterine Leydig cell function leading to normal male external genital development. Some patients have very mild disorders of mineralocorticoid secretion, characterized by normal electrolytes and elevated plasma renin activity, as well as having rather mild hypergonadotropic hypogonadism. As a result of the predominance of a disorder in glucocorticoid secretion, some of these patients have been mistaken for having a form of familial glucocorticoid deficiency (FGD) (117), which is caused by disorders in the ACTH receptor [melanocortin receptor

type 2 (MC2R)] or melanocortin receptor accessory protein (MRAP) (119). Thus, the spectrum of clinical presentation of mutations in the StAR protein is substantially broader than initially appreciated.

Treatment of lipoid CAH consists of physiological replacement with glucocorticoids, mineralocorticoids, and in the newborn period, salt (96, 97). The glucocorticoid requirement is less than in the virilizing adrenal hyperplasias because it is not necessary to suppress excess adrenal androgen production, so that growth in these patients should be normal (97). Genetic males have female external genitalia and should undergo orchiectomy and be raised as females (67, 96, 97). Successful pregnancy has been induced in an adult female with lipoid CAH by clomiphene citrate stimulation, followed by progesterone supplementation to mimic the maternally produced first trimester progesterone that the affected mother could not produce (120).

## V. Conversion of Cholesterol to Pregnenolone: P450scc and Its Electron Transfer Proteins

### A. P450scc

A cell is said to be steroidogenic if it expresses the cholesterol side-chain cleavage enzyme, P450scc, which catalyzes the first step in steroidogenesis. Conversion of cholesterol to pregnenolone in mitochondria is the first, rate-limiting, and hormonally regulated step in the synthesis of all steroid hormones (121–123). This process involves three distinct chemical reactions, the 22-hydroxylation of cholesterol, 20-hydroxylation of 22(R)-hydroxycholesterol, and oxidative scission of the C20–22 bond of 20(R),22(R)-dihydroxycholesterol (the side-chain cleavage event), yielding pregnenolone and isocaproaldehyde. P450scc can use the hydroxysterol intermediates directly as substrate, providing a useful experimental tool because these hydroxysterols are somewhat water-soluble and do not require StAR for access to P450scc (66). However, these reactions are probably not important *in vivo* because their  $k_{cat}/K_m$  ratios are much higher than that of cholesterol (124), and the high  $K_D$  of approximately 3000 nM drives the dissociation of pregnenolone from P450scc. The reactions catalyzed by P450scc are slow, with a net turnover number of about six (125) to 20 (124) molecules of cholesterol per molecule of P450scc per second. Because 20-hydroxycholesterol, 22-hydroxycholesterol, and 20,22-dihydroxycholesterol could all be isolated from bovine adrenals in significant quantities, and because 3 moles of NADPH were required per mole of cholesterol converted to pregnenolone, it was initially thought that three separate enzymes were involved. However, protein purification and reconstitution of enzymatic activity *in vitro* showed that a single protein, termed P450scc (where scc refers to the



side chain cleavage of cholesterol) converted cholesterol to pregnenolone (126, 127) (for review see Refs. 3 and 128). These three reactions occur on a single active site that is in contact with the IMM. P450scc can also cleave the side chain of other hydroxysterols (*e.g.*, 7-dehydrocholesterol) and can 20- and 22-hydroxylate vitamin D<sub>3</sub> (129).

Cloning of the bovine cDNA for P450scc (130) preceded the cloning of the human cDNA (131) and gene (132) (now termed *CYP11A1*), which lies on chromosome 15q23-q24 and consists of nine exons spanning about 30 kb. The 2-kb mRNA encodes 521 amino acids, including a 39- amino acid mitochondrial leader peptide that is cleaved off during the entry of P450scc into the mitochondria.

Forms of P450scc engineered to lack the mitochondrial leader or that are targeted to the endoplasmic reticulum are inactive, demonstrating that the mitochondrial environment is required for activity (133). A spontaneous deletion of the rabbit *cyp11a1* gene for P450scc (134), its knockout in the mouse (135), and rare patients with P450scc mutations (136, 137) result in the loss of all steroidogenesis, indicating that all steroidogenesis is initiated by this one enzyme. Thus the presence of P450scc renders a cell 'steroidogenic' and able to make steroids *de novo*, as opposed to modifying steroids produced elsewhere, which occurs in many types of cells.

Expression of P450scc is induced by cAMP in the adrenal zona fasciculata/reticularis (138), testis (139), and ovary; and by the calcium/protein kinase C system in the zona glomerulosa (140, 141). By contrast, placental P450scc expression is constitutive (68) and requires the action of several members of the CP2 (*grainyhead*) family of transcription factors (142–145). Side-chain cleavage activity and pregnenolone biosynthesis have been demonstrated in the rat and human brain (146), and abundant P450scc expression is found in the rodent brain, especially in fetal life. Transcription of the *CYP11A1* gene encoding P450scc determines the amount of P450scc enzyme and the net steroidogenic capacity of a cell. This transcription is regulated in both tissue-specific and hormonally responsive fashions and can be induced by both the protein kinase A and protein kinase C second messenger systems, which act through different DNA elements in the *CYP11A1* promoter (141). The expression of P450scc and other steroidogenic enzymes in the adrenal and gonad require the action of the zinc-finger transcription factor, steroidogenic factor 1 (SF1) (147, 148); by contrast, expression of P450scc in the human placenta is independent of SF1 and requires CP2 proteins (formerly termed LBP proteins) (142–145) and TreP-132 (149, 150). Thus, long-term cellular stimulation over the course of days will increase the content of P450scc and the level of basal steroid produced,

as well as the capacity of the cell to mount a steroidogenic response. A comprehensive overview of the factors regulating the transcription of steroidogenic factors is beyond the scope of this review, but some recent, more focused reviews are available (151, 152).

### B. P450scc deficiency

Several patients have now been described with mutations in P450scc (136, 137, 153–155). Although these patients may be clinically and hormonally indistinguishable from those with lipoid CAH, their StAR genes are normal. It would seem logical that elimination of P450scc activity would be incompatible with term gestation because the placenta, a fetal tissue, must produce progesterone in the second half of pregnancy to suppress maternal uterine contractions, thus preventing miscarriage. It is most likely that these few fetuses with P450scc mutations reached term gestation because of unusually protracted maintenance of the maternal corpus luteum of pregnancy, which normally involutes in the second trimester. However, maternal progesterone production during these pregnancies has not been investigated directly. Mild or nonclassic P450scc deficiency has been reported recently in patients carrying P450scc mutations that retain about 10–20% of wild-type activity (156, 157). By hormonal and clinical criteria, nonclassic P450scc deficiency is indistinguishable from nonclassic lipoid CAH. However, all patients reported to date with P450scc deficiency have had normalized or small adrenals, in contrast to the massive adrenal enlargement that characterized lipoid CAH from severe StAR mutations.

### C. Chronic maintenance of the steroidogenic machinery

Whereas the acute regulation of steroidogenesis is determined by the action of StAR, P450scc is the enzymatic rate-limiting step in steroidogenesis. Thus, the chronic regulation of steroidogenesis is quantitatively (how much) determined by P450scc gene expression (158) and qualitatively (which steroids) determined by the expression of downstream enzymes, especially P450c17. The episodic bursts of cAMP resulting from the binding of ACTH and LH to their respective receptors are necessary but not sufficient for the continued expression of the steroidogenic enzymes and the production of steroids. Patients with inactivating mutations in the ACTH receptor (MC2R) (159) or the LH/hCG receptor (160) make negligible steroids from the affected glands.

Conversely, activating mutations of the G $\alpha_s$  protein, which couples receptor binding to cAMP generation, and activating mutations of the LH receptor cause hypersecretion of steroids (161). Indeed, cAMP-responsive elements have been identified in the genes for most of the



human steroidogenic P450 enzymes, but this mechanism alone does not explain the diversity of steroid production observed in the various zones of the adrenal cortex, the gonads of both sexes, the placenta, and the brain. Other transcription factors (*e.g.*, AP2, SP1, SP3, NF1C, NR4A1, NR4A2, GATA4, and GATA6) participate in regulating the basal- and cAMP-stimulated transcription of each gene. SF1 coordinates the expression of steroidogenic enzymes in adrenal and gonadal cells (147). By contrast, steroidogenesis in the brain (162) and placenta (142–145) is independent of SF1. Targeted disruption of the SF1 gene in the mouse disrupts steroid biosynthesis and blocks the development of the adrenal glands, gonads, and the ventromedial hypothalamus (163). The action of SF1 is modified by other transcription factors (*e.g.*, WT1 and DAX1) (164) or by its phosphorylation (165) or sumoylation (166). Thus, the development of steroidogenic organs is intimately related to the capacity to produce steroids, and multiple factors acting on the genes for steroidogenic enzymes yield both common features and diversity among the steroidogenic tissues.

#### D. Transport of electrons to P450<sub>scc</sub>: ferredoxin reductase and ferredoxin

P450<sub>scc</sub> functions as the terminal oxidase in a mitochondrial electron transport system (49). Electrons from NADPH are accepted by a flavoprotein, termed ferredoxin reductase (also known as adrenodoxin reductase), which is associated with the IMM. Ferredoxin reductase transfers the electrons to an iron/sulfur protein termed ferredoxin (adrenodoxin), which is found in the mitochondrial matrix or loosely adherent to the IMM. Ferredoxin then transfers the electrons to P450<sub>scc</sub> (Fig. 6). Ferredoxin reductase and ferredoxin serve as generic elec-

tron transfer proteins for all mitochondrial P450s, including the vitamin D 1 $\alpha$ - and 24-hydroxylases. Ferredoxin forms a 1:1 complex with ferredoxin reductase, dissociates, then subsequently reforms an analogous 1:1 complex with a mitochondrial P450 such as P450<sub>scc</sub>, thus functioning as an indiscriminate diffusible electron shuttle mechanism. The human genes for ferredoxin reductase (167, 168) and ferredoxin (169) are expressed in all tissues (170, 171), suggesting that they may have additional roles beyond electron transfer to P450 enzymes.

#### E. Ferredoxin reductase

Ferredoxin reductase is widely expressed in human tissues, but its expression is two orders of magnitude higher in steroidogenic tissues (171). The primary RNA transcript from the 11-kb *FDXR* gene (168) on chromosome 17q24-q25 (172) is alternatively spliced, generating two mRNA species that differ by only 18 bp (167), but only the protein encoded by the shorter mRNA is active in steroidogenesis (173). Unlike most steroidogenic genes, the promoter for ferredoxin reductase contains six copies of GGGCGGG sequences (168), which is the canonical binding site for the transcription factor SP1 typically found in housekeeping genes. Accordingly, cAMP does not regulate transcription of the ferredoxin reductase gene, as is the case for ferredoxin and P450<sub>scc</sub> (171). Mutations in the human genes for ferredoxin and ferredoxin reductase have not been described, but mutation of the *Drosophila* ferredoxin reductase homolog *dare* causes developmental arrest and degeneration of the adult nervous system due to the loss of ecdysteroid production (174).

Crystallography shows that bovine ferredoxin reductase consists of two domains, each comprising a  $\beta$ -sheet core surrounded by  $\alpha$ -helices (175). The NADP(H)-binding domain (residues 106 to 331 in bovine numbering) is a compact region, whereas the more open flavin adenine dinucleotide (FAD) domain, formed by the remaining amino- and carboxy-terminal residues, binds the dinucleotide portion of FAD across a Rossman fold with the redox-active flavin isoalloxazine ring abutting the NADP(H) domain. By analogy to related structures, including glutathione and thioredoxin reductases, the nicotinamide ring of NADPH appears to lie adjacent to the flavin ring in position to transfer its two electrons to the FAD. Thus, intramolecular electron transfer occurs in the cleft formed by the angled apposition of these two domains. Within this cleft, basic residues abound, including arginines 240 and 244, which are important for interactions with ferredoxin (176, 177). Hypothetical docking of the two structures suggests that the negative surface of ferredoxin fits elegantly into the positive surface of ferredoxin reductase, even with NADP(H) bound (175). Basic residues are also critical for the interaction of P450<sub>scc</sub> with the negative

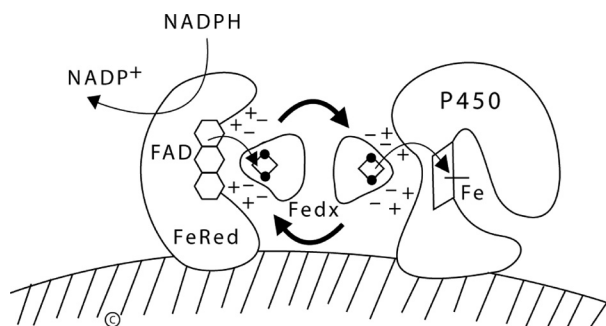

**FIG. 6.** Electron transport to mitochondrial forms of cytochrome P450. The flavin group (FAD) of ferredoxin reductase (FeRed), which is bound to the IMM, accepts two electrons from NADPH, converting it to NADP<sup>+</sup>. These electrons pass to the iron-sulfur ( $\text{Fe}_2\text{S}_2$ , diamond with dots) cluster of ferredoxin (Fedx), which is found either in the mitochondrial matrix, as shown, or loosely associated with the IMM. Fedx then donates the electrons to the heme of the P450 (square with Fe). Negatively charged residues in Fedx (–) guide docking and electron transfer with positively charged residues (+) in both FeRed and the P450. For P450<sub>scc</sub>, three pairs of electrons must be transported to the P450 to convert cholesterol to pregnenolone. [© W. L. Miller.]

surface charges on ferredoxin (178), so that ferredoxin reductase-ferredoxin docking is expected to share some key features with the mitochondrial P450-ferredoxin interaction.

## F. Ferredoxin

Ferredoxin is a small (14 kDa), soluble, iron/sulfur ( $\text{Fe}_2\text{S}_2$ ) electron shuttle protein that either resides free in the mitochondrial matrix or is loosely bound to the IMM (179). Encoded by the *FDX1* gene on chromosome 11q22 that spans 35 kb, ferredoxin is expressed in many tissues, and its expression in steroidogenic tissues is induced by cAMP in parallel with P450<sub>scc</sub> (180).

Bovine ferredoxin consists of two domains (181), a core region and an interaction domain. The core region contains residues 1–55 and 91–end (bovine numbering), including the four cysteines whose sulfur atoms tether the  $\text{Fe}_2\text{S}_2$  cluster to the protein. Residues 56 to 90 form the interaction domain, which contains a helix at its periphery that includes acidic residues, aspartates 72, 76, and 79, plus glutamate 73, which are critical for the interaction of ferredoxin with P450<sub>scc</sub> (182). The  $\text{Fe}_2\text{S}_2$  cluster lies in a protuberance in the molecule at the junction of its two domains. The charged residues of ferredoxin cluster in the interaction domain, giving the molecule a highly negatively charged surface above the  $\text{Fe}_2\text{S}_2$  cluster. This description of ferredoxin is consistent with earlier studies that showed that overlapping sets of negative charges on ferredoxin drive interactions with positive charges on both P450<sub>scc</sub> and ferredoxin reductase (176). Thus, the preponderance of the evidence indicates that the same surface of ferredoxin interacts with both ferredoxin reductase and the P450 to transport electrons (176, 178). Despite this constraint, it has been possible to construct catalytically active, three-component fusion proteins of the general structure  $\text{H}_2\text{N}$ -P450<sub>scc</sub>-ferredoxin reductase-ferredoxin-COOH, but all have required that the ferredoxin moiety be located at the carboxyl terminus attached to a hydrophilic linker that permits rotational freedom, so that the same surface of the ferredoxin moiety can access both the P450 and the ferredoxin reductase moiety (133, 183, 184).

## VI. 3 $\beta$ -Hydroxysteroid Dehydrogenase/ $\Delta^5 \rightarrow \Delta^4$ Isomerase (3 $\beta$ HSD)

Once pregnenolone is produced from cholesterol, it may undergo 17 $\alpha$ -hydroxylation by P450<sub>c17</sub> to yield 17 $\alpha$ -hydroxypregnenolone, or it may be converted to progesterone, the first biologically important steroid in the pathway. A 42-kDa microsomal enzyme, 3 $\beta$ HSD, catalyzes both conversion of the hydroxyl group to a keto group on

carbon 3 and the isomerization of the double bond from the B ring ( $\Delta^5$  steroids) to the A ring ( $\Delta^4$  steroids) (185–187). This 3 $\beta$ HSD converts pregnenolone to progesterone, 17 $\alpha$ -hydroxypregnenolone to 17 $\alpha$ -hydroxyprogesterone (17OHP), DHEA to androstenedione, and androstenediol to testosterone, all with similar efficiency ( $K_m$  and  $V_{max}$ ) (188). The  $K_m$  of the 3 $\beta$ HSD reactions is about 5  $\mu\text{M}$ , which is substantially higher than the 0.8  $\mu\text{M}$   $K_m$  for 17-hydroxylation by P450<sub>c17</sub> (189), thus favoring the  $\Delta^5$  pathway. This conversion of  $\Delta^5$  steroids into their  $\Delta^4$  congeners consists of two chemical transformations, both performed by 3 $\beta$ HSD. The first reaction is the oxidation of the 3 $\beta$ -hydroxyl group to the ketone; during this process,  $\text{NAD}^+$  is converted to NADH. The intermediate  $\Delta^5$ , 3-ketosteroid remains tightly bound to the enzyme with nascent NADH, and the presence of NADH in the cofactor-binding site activates the enzyme's second activity, the  $\Delta^5 \rightarrow \Delta^4$ -isomerase activity (190).

Although rodents contain multiple 3 $\beta$ HSD isoforms, the human genome has only two active genes and several pseudogenes. These two enzymes are encoded by closely linked genes on chromosome 1p13.1 with identical intron/exon organizations. The type 1 enzyme catalyzes 3 $\beta$ HSD activity in placenta, breast, liver, brain, and some other tissues (186, 191, 192). This isoform is required for placental progesterone production during pregnancy, which may explain why a deficiency of 3 $\beta$ HSD1 has never been described. In contrast, the type 2 enzyme (3 $\beta$ HSD2) is the principal isoform in the adrenals and gonads (191, 193). Deficiency of 3 $\beta$ HSD2 causes the rare form of CAH known as 3 $\beta$ HSD deficiency (194, 195). The presence of the type 1 isozyme in these patients helps to explain the paradox of why 46,XX individuals born with severe 3 $\beta$ HSD2 deficiency can virilize slightly *in utero*: the 3 $\beta$ HSD block in the adrenal diverts  $\Delta^5$ -steroids away from cortisol and toward DHEA; extraadrenal 3 $\beta$ HSD1 then permits testosterone synthesis despite 3 $\beta$ HSD2 deficiency in the adrenal.

The type 1 and type 2 enzymes share 93.5% amino acid identity and are biochemically and enzymatically very similar. The enzymes are strongly inhibited by  $\Delta^4$  products (196) and by synthetic  $\Delta^4$  steroids such as medroxyprogesterone acetate (188). Both enzymes have very similar affinities of about 5  $\mu\text{M}$  for the  $\Delta^5$ , 17-ketosteroids pregnenolone, 17 $\alpha$ -hydroxypregnenolone, and DHEA (185, 188) and also convert the 17 $\beta$ -hydroxysteroid androstenediol (androst-5-ene-3 $\beta$ ,17 $\beta$ -diol) to testosterone. These enzymes are primarily membrane-bound and are found in both the microsomal and mitochondrial fractions during subcellular fractionation (185). Soluble forms of the enzyme have been engineered, and studies using these truncated forms demonstrate that H156 of 3 $\beta$ HSD1 is

responsible for its higher affinity than  $3\beta$ HSD2 for the inhibitors epostane and trilostane (197). Ultrastructural studies using immunogold labeling show that, at least in bovine adrenal zona glomerulosa cells,  $3\beta$ HSD immunoreactivity is found in mitochondria and endoplasmic reticulum as well as in the cytoplasm (198). It is not clear whether this is also true for human  $3\beta$ HSD or whether this subcellular distribution differs in various types of steroidogenic cells, but this property could be a novel mechanism for regulating the direction of steroidogenesis (199).

$3\beta$ HSD activity is important in regulating adrenal production of DHEA sulfate (DHEAS). The human fetal adrenal, which produces vast amounts of DHEAS, contains little  $3\beta$ HSD immunoreactivity (200). Furthermore, the expression of  $3\beta$ HSD in the innermost regions of the adrenal cortex declines as the zona reticularis develops in childhood to initiate adrenarche (201, 202), and  $3\beta$ HSD immunoreactivity is low in the adult rhesus (203, 204) and human (201, 205) zona reticularis. Thus, the development of an adrenal cell type (reticularis) that is relatively deficient in  $3\beta$ HSD activity appears to be a necessary component of adrenarche, in which adrenal production of the  $\Delta^5$  steroids DHEA and DHEAS rises exponentially (206).

### A. $3\beta$ -Hydroxysteroid dehydrogenase deficiency

$3\beta$ HSD deficiency is a rare cause of glucocorticoid and mineralocorticoid deficiency that may be fatal if not diagnosed early in infancy (194). In its classic form, genetic females may have clitoromegaly and mild virilization because the fetal adrenal overproduces large amounts of DHEA, a small portion of which is converted to testosterone via extraadrenal  $3\beta$ HSD1. Genetic males also synthesize some androgens by peripheral conversion of adrenal and testicular DHEA, but the concentrations are insufficient for complete male genital development so that these males have a small phallus and severe hypospadias. Genetic studies have identified numerous mutations causing  $3\beta$ HSD deficiency, all found in the type 2 gene (195, 207–210). Mutations have not been found in  $3\beta$ HSD1, presumably because this would prevent placental biosynthesis of progesterone, resulting in a spontaneous first-trimester abortion.

The presence of peripheral  $3\beta$ HSD1 activity complicates the hormonal diagnosis of this disorder. One would expect that affected infants should have low concentrations of 17OHP, yet some newborns with  $3\beta$ HSD deficiency have very high concentrations of serum 17OHP, approaching those seen in patients with classical 21-hydroxylase deficiency (211). The adrenal of a patient with  $3\beta$ HSD2 deficiency will secrete very large amounts of the  $\Delta^5$  steroids, pregnenolone,  $17\alpha$ -hydroxypregnenolone, and DHEA. Some of the secreted  $17\alpha$ -hydroxypregnenolone is then converted to 17OHP by  $3\beta$ HSD1, mainly

in the liver. This 17OHP is not effectively taken up by the adrenal for subsequent conversion to cortisol because the circulating concentrations are below the  $K_m$  of P450c21 (0.8–1.0  $\mu$ M 17OHP, or about 40,000 ng/dl) (189). The ratio of the  $\Delta^5$  to the  $\Delta^4$  compounds remains high, consistent with the adrenal and gonadal deficiency of  $3\beta$ HSD (211). Thus, the principal diagnostic test in  $3\beta$ HSD deficiency is iv administration of cosyntropin with measurement of the three  $\Delta^5$  compounds and the corresponding  $\Delta^4$  compounds. Similar to 21-hydroxylase deficiency, where heterozygotes cannot be diagnosed by the response of 17OHP to cosyntropin stimulation, steroidal responses to cosyntropin cannot be used to identify carriers of  $3\beta$ HSD deficiency (212).

Mild or partial defects of adrenal  $3\beta$ HSD activity have been reported on the basis of ratios of  $\Delta^5$  steroids to  $\Delta^4$  steroids after a cosyntropin test that exceed 2 or 3 SD above the mean. These patients are typically young girls with premature adrenarche or young women with a history of premature adrenarche and complaints of hirsutism, virilism, and oligomenorrhea (213–215). However, the  $3\beta$ HSD2 genes are normal in these patients, and even patients with less severe  $3\beta$ HSD2 mutations have ratios of  $\Delta^5$  to  $\Delta^4$  steroids that exceed 8 SD above the mean (210, 216–219). Thus, ratios of  $\Delta^5$  to  $\Delta^4$  steroids are not reliable, and the diagnosis must rest on the cosyntropin-induced rise in  $\Delta^5$  steroids such as  $17\alpha$ -hydroxypregnenolone to more than 3000 ng/dl (90 nmol/liter) to cosyntropin stimulation, (210, 216–219). The basis of the mildly elevated ratios of  $\Delta^5$  to  $\Delta^4$  steroids in these hirsute individuals with normal *HSD3B2* genes is unknown.

## VII. P450c17: $17\alpha$ -Hydroxylase/ $17,20$ -Lyase

P450c17 is the microsomal P450 enzyme that catalyzes both  $17\alpha$ -hydroxylase and  $17,20$ -lyase activities, principally in the adrenal and gonads. These two activities were once thought to be catalyzed by separate enzymes that differed in the adrenals and gonads. Clinical observations showed that adrenal  $17\alpha$ -hydroxylase activity (reflected by serum cortisol concentrations) was fairly constant throughout life, whereas adrenal  $17,20$ -lyase activity (reflected by serum DHEA and DHEAS concentrations) was low in early childhood but rose abruptly during adrenarche at ages 8 to 10 yr (220, 221). This dissociation between adrenal secretion of  $17\alpha$ -hydroxylase products (cortisol) and  $17,20$ -lyase products (DHEA) suggested that distinct enzymes performed the two transformations. This hypothesis was reinforced by the description of a few patients apparently lacking  $17,20$ -lyase activity but retaining normal  $17\alpha$ -hydroxylase activity (222). Consequently, reports (223) that the  $17\alpha$ -hydroxylase and



17,20-lyase activities of neonatal pig testes copurified and that both 17 $\alpha$ -hydroxylase and 17,20-lyase activities reside in a single protein (224, 225) were initially received with great skepticism. This controversy of “one enzyme or two” persisted until the cDNA for bovine P450c17 was cloned and shown to confer both 17 $\alpha$ -hydroxylase and 17,20-lyase activities when expressed in nonsteroidogenic COS-1 cells (226). The single 2.1-kb mRNA species yields the 57-kDa P450c17 protein. Cells transfected with vectors expressing P450c17 cDNA acquire both 17 $\alpha$ -hydroxylase and 17,20-lyase activities (226, 227), clearly establishing that this one enzyme catalyzes both activities. Thus, the distinction between 17 $\alpha$ -hydroxylase and 17,20-lyase is functional and not genetic or structural. P450c17 is encoded by a single gene on chromosome 10q24.3 (228, 229), which is expressed in the adrenals and gonads (230), and not two tissue-specific isozymes as had been thought. This gene, formally called *CYP17A1*, is structurally related to the gene for P450c21 (21-hydroxylase) (231).

Human P450c17 17 $\alpha$ -hydroxylates both pregnenolone and progesterone with approximately equal efficiency (189, 232), but there are prominent differences between  $\Delta^4$  and  $\Delta^5$  substrates for all other reactions. The 17,20-lyase activity is about 50 times more efficient for the conversion of 17 $\alpha$ -hydroxypregnenolone to DHEA than for the conversion of 17OHP to androstenedione, consistent with the large amounts of DHEA secreted by the adult and fetal human adrenal (189, 232). Thus, under normal circumstances, 17OHP is not an important precursor for human sex steroid synthesis. The rate of the lyase reaction can be increased more than 10-fold by cytochrome *b<sub>5</sub>* (189, 232, 233), but the  $\Delta^5$  preference persists, and the rate of the lyase reaction never quite reaches the rate of the hydroxylase reactions. Human P450c17 can also 16 $\alpha$ -hydroxylate progesterone but not pregnenolone (186), due to the presence of alanine rather than leucine at residue 105 (234). In the presence of *b<sub>5</sub>*, P450c17 diverts about 10% of pregnenolone metabolism to a  $\Delta^{16}$  andiene product (235), which is of agricultural interest because this reaction forms a pheromone in pigs that results in “boar taint” (236). Experiments to study the chemistry of human P450c17 (and other P450 enzymes) often require manipulations that could be considered nonphysiological; however, the remarkable consistency for substrate preferences and kinetic constants observed for the modified, solubilized P450c17 expressed in *Escherichia coli* (232, 233), for native P450c17 expressed in yeast microsomes (189) or intact COS-1 cells (237), and for P450c17 obtained from human tissues and cells (189, 238) provide a high degree of confidence in results from work done *in vitro*.

Mechanistically, P450c17-mediated hydroxylations appear to proceed via the common iron oxene species and “oxygen rebound” mechanism proposed for prototypical P450 hydroxylations (239). The mechanism of the 17,20-lyase reaction involving a carbon-carbon bond cleavage, however, is not known despite considerable study. The failure of hydrogen peroxide alone to support catalysis (as has been shown for some other P450-mediated deacylation reactions) and computer modeling studies consistently suggest that the same heme-oxygen complex might participate in both hydroxylations and the 17,20-lyase reaction (240), but no conclusive evidence exists to exclude any proposed mechanisms. Given the diverse repertoire of reactions catalyzed by P450c17, it is not surprising that synthetic steroids such as dexamethasone (188) and the enantiomer of progesterone (241), as well as planar drugs such as troglitazone (242), also bind to and inhibit P450c17. Guinea pig P450c17 catalyzes the oxidation of spironolactone to 7 $\alpha$ -thiospironolactone, which is a covalent inhibitor (“suicide substrate”) of P450c17 (243). The human P450c17 inhibitor abiraterone acetate, a 17-pyridyl pregnenolone analog, is in clinical trials for the treatment of prostate cancer (244, 245).

Because P450c17 has both 17 $\alpha$ -hydroxylase activity and 17,20-lyase activity, it is the key branch point in steroid hormone synthesis. Neither activity of P450c17 is present in the adrenal zona glomerulosa; hence, pregnenolone is converted to mineralocorticoids. In the zona fasciculata, the 17 $\alpha$ -hydroxylase activity is present, but 17,20-lyase activity is not; hence, pregnenolone is converted to the glucocorticoid cortisol. In the zona reticularis, both activities are present, so that pregnenolone is converted to sex steroids (Fig. 3). The principal factor regulating the 17,20-lyase reaction is electron transport from NADPH via POR.

#### A. Transcriptional regulation of the human *CYP17A1* gene encoding P450c17

Transcription of the human *CYP17A1* gene encoding P450c17 in adult tissues is largely limited to the adrenal and gonad, although it may also be expressed in skin (246). Rodent *cyp17a1* is expressed in the fetal gastrointestinal tract (247, 248) and brain (249); the transcriptional regulation of rodent *cyp17a1* and human *CYP17A1* are substantially different (250). Adrenal expression of human *CYP17A1* requires the transcription factors SF1, SP1, SP3, CTF2, CTF5, GATA4 and GATA6 (250–255). Recent work indicates that SF1 may activate human *CYP17A1* expression in response to sphingosine (256, 257). Members of the SREBP family of factors that coordinate the synthesis of cholesterol and other sterols, especially SREBP1c, may also participate in regulating *CYP17A1* transcription, linking the regulation of steroid



dogensis with the regulation of cholesterol biosynthesis (258, 259). Regulation of the human gene for cytochrome *b*<sub>5</sub>, a protein that interacts with P450c17 to promote 17,20-lyase activity (see *Section VIII.C*), is regulated similarly to the *CYP17A1* gene for P450c17 (260), thus coordinating the two key factors in androgen biosynthesis.

### B. 17 $\alpha$ -Hydroxylase/17,20-lyase deficiency

The initial description of 17 $\alpha$ -hydroxylase deficiency was a case in which both 17 $\alpha$ -hydroxylase and 17,20-lyase products were absent (261). Cloning of the gene for human P450c17 (231) permitted identification of *CYP17A1* mutations in patients with 17 $\alpha$ -hydroxylase deficiency (262). Deficient 17 $\alpha$ -hydroxylase activity results in decreased cortisol synthesis, overproduction of ACTH, and stimulation of the steps proximal to P450c17. These patients may have mild symptoms of glucocorticoid deficiency, but this is not life-threatening because the lack of P450c17 results in the overproduction of corticosterone, which also has glucocorticoid activity. This is similar to the situation in rodents, whose adrenals lack P450c17 (158) and consequently produce corticosterone as their glucocorticoid. Affected patients also typically overproduce 11-deoxycorticosterone (DOC) in the zona fasciculata, which causes sodium retention, hypertension, and hypokalemia with suppressed plasma renin activity and suppressed aldosterone secretion from the zona glomerulosa, although the suppression of aldosterone is rather variable. When P450c17 deficiency is treated with glucocorticoids, DOC secretion is suppressed and plasma renin activity and aldosterone concentrations rise to normal (263).

The absence of 17 $\alpha$ -hydroxylase and 17,20-lyase activities in complete P450c17 deficiency prevents the synthesis of adrenal and gonadal sex steroids. As a result, affected females are phenotypically normal but fail to undergo adrenarche and puberty (261), and genetic males have absent or incomplete development of the external genitalia (male pseudohermaphroditism, now often termed “46,XY disorder of sex development”) (264). The classical presentation is that of a teenage female with sexual infantilism and hypertension (261, 264). The diagnosis is made by finding low or absent 17-hydroxylated C<sub>21</sub> and C<sub>19</sub> plasma steroids, which respond poorly to stimulation with cosyntropin. Serum levels of DOC, corticosterone, 18-hydroxycorticosterone, and 18-hydroxy DOC are elevated, hyperresponsive to cosyntropin, and suppressible with glucocorticoids. Heterozygotes can sometimes be identified by cosyntropin stimulation testing (234, 265, 266).

More than 50 distinct mutations causing 17 $\alpha$ -hydroxylase deficiency have been identified (267, 268). Four mutations appear recurrently: 1) a duplication of four nucle-

otides causing a frameshift is found among descendents of Dutch Frieslanders (269); 2) in-frame deletion of residues 487–489 is found throughout Southeast Asia (270, 271); 3) a deletion of phenylalanine at position 53 or 54 (272); and 4) the common W406R and R362C mutations, found among Brazilians of Spanish and Portuguese ancestry, respectively (273). The genetic lesions identified include 12 mutations that cause frameshifts or premature translational termination; as expected, none of these mutants has any detectable 17 $\alpha$ -hydroxylase or 17,20-lyase activity. Eleven missense and in-frame mutations have been found, most of which also eliminate all activity, whereas some others, such as P342T, reduce both activities by 80%. Two genome-wide association studies have identified the *CYP17A1* locus as a gene associated with hypertension (274, 275). This finding suggests that milder deficiencies in P450c17 might masquerade as primary hypertension in the general population and, if causative, is predicted to be a low-renin and mineralocorticoid antagonist-responsive form.

### C. Isolated 17,20-lyase deficiency

Selective deficiency of the 17,20-lyase activity of P450c17 has been reported in about a dozen cases (262), which initially led to the incorrect conclusion that 17 $\alpha$ -hydroxylase and 17,20-lyase are separate enzymes. However, the identification of *CYP17A1* mutations causing apparent isolated 17,20-lyase deficiency is fraught with difficulty (276), and, to date, none of the initial clinical reports from the 1970s has been confirmed genetically or biochemically. One of the original patients was studied at the genetic level, showing two wholly inactivating mutations (277), which led to a corrected diagnosis of the patient as having complete 17 $\alpha$ -hydroxylase deficiency (278). Because both the 17 $\alpha$ -hydroxylase and 17,20-lyase activities of P450c17 are catalyzed on the same active site, it was not clear that a syndrome of isolated 17,20-lyase deficiency could exist until two patients with genital ambiguity, normal excretion of 17-hydroxycorticosteroids, and markedly reduced production of C<sub>19</sub> steroids were studied at the molecular genetic level (279). One patient was homozygous for the P450c17 mutation R347H, and the other was homozygous for R358Q; both mutations changed the distribution of surface charges in the redox-partner binding site of P450c17 (279). When assayed *in vitro*, both mutants retained nearly normal 17 $\alpha$ -hydroxylase activity but had no detectable 17,20-lyase activity (279, 280), and enzymatic competition experiments showed that the substrate binding site remained normal (280). When an excess of POR and cytochrome *b*<sub>5</sub> was provided, some 17,20-lyase activity was restored, demonstrating that the loss in lyase activity was caused by impaired electron transfer (280). Several additional patients

have been described with similar mutations, including girls with failure to manifest adrenarche (281).

By contrast, the P450c17 mutation E305G causes 17,20-lyase deficiency by selectively disrupting binding of 17 $\alpha$ -hydroxypregnenolone and preventing DHEA synthesis despite enhanced conversion of 17OHP to androstenedione (282). This unusual variant of isolated 17,20-lyase deficiency provides further genetic evidence that the flux of androgens derived from conversion of 17OHP to androstenedione in the minor  $\Delta^4$  pathway is not sufficient to form normal male external genitalia. One of the first patients reported to have isolated 17,20-lyase deficiency was recently found to have a homozygous mutation (G539R) in POR, further emphasizing the crucial role of efficient electron transfer in the 17,20-lyase reaction (283).

Computational modeling of P450c17 predicts the effects of all known mutations, including those with partial retention of both activities and those causing selective 17,20-lyase deficiency (240). The model identifies Arg 347 and Arg 358 and several other arginine and lysine residues in the redox partner binding site; mutations of these residues all cause varying degrees of selective loss of 17,20-lyase activity (240, 279, 280, 284). Another example of the critical nature of redox-partner interactions comes from the rare syndrome of cytochrome  $b_5$  deficiency. The first patient was a male pseudohermaphrodite with severe methemoglobinemia, but he was not evaluated hormonally (285). A recent, well-studied patient homozygous for the cytochrome  $b_5$  mutation W27X had hormonal findings indicative of isolated 17,20-lyase deficiency and clinically inapparent but elevated concentrations of methemoglobin, as expected from the known role of cytochrome  $b_5$  in the reduction of methemoglobin (286).

Thus, the central role of electron transfer in 17,20-lyase activity is now well-established. Electron transfer for the lyase reaction is promoted by the action of cytochrome  $b_5$  as an allosteric factor rather than as an alternate electron donor (189). The 17,20-lyase activity is also favored by the phosphorylation of serine residues on P450c17 by a cAMP-dependent protein kinase (287–290). The availability of electrons determines whether P450c17 performs only 17 $\alpha$ -hydroxylation or also performs 17,20 bond scission; increasing the ratio of POR or cytochrome  $b_5$  to P450c17 *in vitro* or *in vivo* increases the ratio of 17,20-lyase activity to 17 $\alpha$ -hydroxylase activity. Competition between P450c17 and P450c21 for available 17OHP does not appear to be important in determining whether 17OHP undergoes 21-hydroxylation or 17,20 bond scission (291). Thus, the regulation of 17,20-lyase activity, and consequently of DHEA production, depends on factors that facilitate the flow of electrons to P450c17: high

concentrations of POR, the presence of cytochrome  $b_5$ , and serine phosphorylation of P450c17 (292).

## VIII. Electron Transport: P450 Oxidoreductase and Cytochrome $b_5$

### A. P450 oxidoreductase

All microsomal (type 2) cytochrome P450 enzymes, including steroidogenic P450c17, P450c21, and P450aro, receive electrons from POR, a membrane-bound flavoprotein that is a different protein from the mitochondrial flavoprotein, ferredoxin reductase (49). POR also serves as a reductase for several non-P450 enzymes, including squalene monooxygenase (293), fatty acid elongase (294), heme oxygenase (295), and cytochrome  $b_5$  (296). POR is expressed widely in human tissues and serves as the sole electron transfer protein for all microsomal P450s, including xenobiotic-metabolizing hepatic P450s, steroidogenic P450s, and P450s found in other tissues such as the kidney and brain. POR receives two electrons from NADPH and transfers them one at a time to the P450 (297, 298) (Fig. 7).

Much is known about the structure and biochemistry of POR. Crystallographic studies of rat POR reveal two lobes, one binding FAD and the other binding flavin mononucleotide (FMN), and a flexible amino terminus that tethers POR to the endoplasmic reticulum (299). An  $\alpha$ -helical connecting domain joins the FAD and the FMN domains, and a disordered “hinge” of about 25 residues

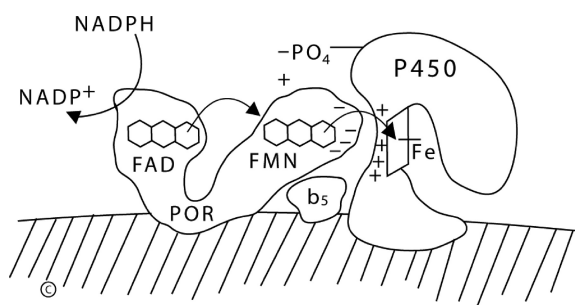

**FIG. 7.** Electron transport to microsomal forms of cytochrome P450. NADPH interacts with POR, bound to the endoplasmic reticulum, and gives up a pair of electrons ( $e^-$ ), which are received by the FAD moiety. Electron receipt elicits a conformational change, permitting the isoalloxazine rings of the FAD and FMN moieties to come close together, so that the electrons pass from the FAD to the FMN. After another conformational change that returns the protein to its original orientation, the FMN domain of POR interacts with the redox-partner binding site of the P450. Electrons from the FMN domain of POR reach the heme group to mediate catalysis. The interaction of POR and the P450 is coordinated by negatively charged acidic residues on the surface of the FMN domain of POR and positively charged basic residues in the concave redox-partner binding site of the P450, similar to the interaction of Fedx with mitochondrial P450s. The active site containing the steroid lies on the side of heme ring (Fe) opposite from the redox-partner binding site. In the case of human P450c17, this interaction is facilitated by the allosteric action of cytochrome  $b_5$ , and by the serine phosphorylation of P450c17. [© W. L. Miller.]

lies between the FMN domain and the connecting domain, suggesting that the FMN and FAD domains can move substantially relative to each other. In the crystal structure of rat liver POR (299), the FMN and FAD lie at the base of a cleft formed by the butterfly-shaped apposition of the FAD and FMN domains, reminiscent of the electron transfer surface of ferredoxin reductase (175). Nuclear magnetic resonance and x-ray scattering data have recently confirmed this view that POR undergoes these dramatic conformational changes while receiving and then transferring electrons (299). It is not clear how the surface containing the FMN docks into the redox partner-binding surface of the P450, but the flexible hinge region on which the FMN domain resides suggests that the FMN domain can reorient itself significantly to accommodate docking to the P450 (49, 189). The surface of the electron-donating FMN domain is dominated by acidic residues, whereas the redox-partner binding site of P450 enzymes contains numerous basic residues. In the rat POR, NADPH binds above the FAD in the  $\beta$ -sheet-rich FAD domain, implying direct donation of electrons from the NADPH to the FMN; however, it appears that yeast POR can bind FMN in two different places (300). If this is also true for human POR, it might explain the partial retention of activity by mutants predicted to disrupt FMN binding.

The crystal structure of the complex between the P450 and flavoprotein domains of the bacterial protein P450BM3 serves as a model of this flavoprotein-P450 interaction (301). Negative charges of the FMN domain guide interactions with positive charges on the P450. The FMN approaches no closer than 18 Å from the heme, similar to the 16 Å distance of FAD from the  $\text{Fe}_2\text{S}_2$  cluster in the modeled ferredoxin-ferredoxin reductase complex, and presumably similar to the distance of the heme from the  $\text{Fe}_2\text{S}_2$  cluster in the P450-ferredoxin complex (175). These distances are too far for electrons to “jump” directly to the heme; rather, electron transfer apparently uses the polypeptide chain as a conduit (301). Basic residues in the redox-partner-binding surface of the recipient P450 are crucial for electron transfer from POR (49, 302), as shown by the mutations in human P450c17 that cause 17,20-lyase deficiency (240, 280). Thus, these structures demonstrate several key principles of the electron transfer proteins involved in human steroidogenesis: NADPH and prosthetic groups lie at the interfaces of protein domains in which electron transfer occurs; the electron transfer surfaces are negatively charged to pair with positive charges on the P450s; the terminal electron transfer moiety (FMN domain or ferredoxin) must be mobile or soluble to pass electrons on to the P450; and electrons flow from the FMN or  $\text{Fe}_2\text{S}_2$  cluster along the adjacent polypeptide chain to the heme.

The 69-kb human *POR* gene, located on chromosome 7q11.2, consists of 16 exons (303). The sequence of this gene in 842 normal persons from four ethnic groups revealed a high degree of polymorphism; most notably, the coding sequence variant A503V was found on approximately 28% of all alleles (304). This sequence variant reduces the 17 $\alpha$ -hydroxylase and 17,20-lyase activities of P450c17 to approximately 60% of normal (304, 305) but has no measurable effect on the activities of P450c21 (306) or hepatic CYP1A2 or CYP2C19 (307), but it reduces the activities of CYP2D6 and CYP3A4 to metabolize important drugs *in vitro* (308, 309).

### B. P450 oxidoreductase deficiency

Because POR participates in so many reactions, its mutation might be expected to yield a very severe phenotype. Consistent with this, genetically engineered POR-knockout mice die during fetal development (310, 311). A knockout encompassing the translational start site and N-terminal membrane-insertion domain yielded a soluble, cytoplasmic 66-kDa protein (310). Homozygous knockout mice had either of two phenotypes. Type I embryos appeared normal until embryonic day 10.5 (E10.5) and had grossly normal somite formation, but they had cardiac, neural tube, eye, and limb defects and died by E13.5. Type II embryos had generally retarded development by E8.5 and died shortly thereafter (310). A more complete knockout, encompassing the entire protein-coding region, yielded a similar phenotype, with all mice dying by E9.5 (311). By contrast, liver-specific POR knockout mice created by cre/lox technology were grossly normal—developing, growing, and living as long as normal mice, and having normal reproductive capacity, indicating normal gonadal P450 function (312, 313). However, these mice had hepatomegaly, accumulated hepatic lipids, and had a 99% decrease in bile acids, 65% decrease in serum cholesterol, and 50% decrease in serum triglycerides. Furthermore these animals had dramatically decreased capacities to metabolize acetaminophen, phenobarbital, and testosterone despite having a 5-fold increase in total hepatic P450 content. There is no established role for cytochrome P450 enzymes in the cardiac, neural tube, limb, and eye systems that are disrupted in POR knockout mice or in the disrupted skeletal development characteristic of human POR mutations causing Antley-Bixler syndrome (ABS). It has been proposed that the pleiotropic effects of POR mutation disrupt the metabolism of *all-trans* retinoic acid because increased maternal ingestion of retinoic acid partially ameliorated the phenotype of the complete POR knockout mouse (311).

Despite its embryonic lethality in mice, POR deficiency is a newly recognized form of CAH (305, 314–319). Beginning in 1985, several patients were described with ap-



parent combined deficiencies of P450c17 and P450c21 (320–324); it was suggested that a mutation in POR was responsible (325), but this was not proven until 2004 (314). The initial report described three patients with ABS, genital ambiguity, and hormonal findings, suggesting partial deficiencies of 17 $\alpha$ -hydroxylase and 21-hydroxylase, as well as a fourth patient who was phenotypically normal but had a similar hormonal profile. All had recessive, loss-of-function amino acid replacement mutations in POR (314). One of these patients was born to a woman who had become virilized during the pregnancy, suggesting partial fetoplacental aromatase deficiency. Over 50 POR mutations have now been described, affecting various P450 enzymes to differing degrees, apparently explaining the great variability in the clinical and hormonal findings in POR deficiency (305, 319). *In vitro* biochemical assays of the recombinant mutant proteins showed that the mutations in the ABS subjects had severely impaired, but not totally absent, activity whereas the mutations found in the phenotypically normal subject with amenorrhea were less severe (314). The serum and urinary steroids indicate defects in both P450c17 and P450c21, and clinical findings vary from severely affected infants with ambiguous genitalia, cortisol deficiency, and ABS to mildly affected women who appear to have a form of polycystic ovary syndrome, or mildly affected men with gonadal insufficiency. ABS is characterized by craniosynostosis, brachycephaly, radioulnar or radio-humeral synostosis, bowed femora, arachnodactyly, midface hypoplasia, proptosis, and choanal stenosis. When ABS is seen in association with abnormal steroids and ambiguous genitalia in either sex, the cause is an autosomal recessive mutation in POR (305, 314–317); by contrast, when ABS is seen without a lesion in steroidogenesis or genital development, the cause is an autosomal dominant, gain-of-function mutation in fibroblast growth factor receptor 2 (305) because mutations in the *POR* and *FGFR2* genes segregate completely (305).

Patients with POR deficiency typically have normal electrolytes and mineralocorticoid function, nearly normal levels of cortisol that respond poorly to stimulation with cosyntropin, high concentrations of 17OHP that respond variably to cosyntropin, and low levels of C<sub>19</sub> precursors of sex steroids. An important feature of POR deficiency is that there is genital ambiguity in both sexes; females may be virilized and males may be underdeveloped, although there is considerable variation among individuals. Because the 17,20-lyase activity of P450c17 is especially sensitive to perturbations in electron transport (49, 279, 280), defects in fetal testicular steroidogenesis leading to incompletely developed external genitalia in 46,XY males is the predicted outcome. By contrast, the partial virilization seen in 46,XX genetic females appears

to be due to two causes. First, because placental aromatase (P450aro) requires POR, some, but not all mothers of infants with POR deficiency experience virilization during pregnancy (305, 314, 318), similar to that experienced by women carrying a fetus with P450aro deficiency (326, 327). This phenotype is common with the R457H mutation prevalent in Japan, but not with the A287P mutation prevalent in Europe. Not surprisingly, the R457H mutant cannot support P450aro activity *in vitro*, whereas the A287P mutant retains full activity with P450aro (328). The fetus normally disposes of large amounts of adrenal C<sub>19</sub> steroids by excreting them through the placenta, which aromatizes them to the maternal estrogens of pregnancy (329). A defect in this placental aromatase activity, either from mutation of POR or P450aro itself, will permit large amounts of fetal C<sub>19</sub> steroids to enter and virilize the mother. This is evidenced by the low estriol values seen in women carrying a fetus with POR deficiency (330, 331). Second, an alternative “backdoor” pathway of androgen biosynthesis has been described in fetal marsupials in which 17OHP is eventually converted to dihydrotestosterone (DHT) without utilizing androstenedione and testosterone as intermediates (see *Section XVIII*) (332, 333). Analysis of urinary steroids from patients with POR deficiency suggests that this pathway also applies to the human fetus (316, 330, 331, 334). The relative importance of these two distinct mechanisms for virilizing the fetus with POR deficiency probably varies with the specific POR mutation involved.

The incidence of POR deficiency is unknown; the rapid description of large numbers of patients (305, 319) and the potentially very subtle clinical manifestations in individuals carrying mutations with partial activity (283, 305, 314, 335) suggest that POR deficiency may be fairly common. Two mutations are especially common: A287P, the predominant mutation in patients of European ancestry, and R457H, the predominant mutation in patients of Japanese ancestry. Because few patients have been studied in the newborn period, it has not been established whether newborn screening of 17OHP designed to detect 21-hydroxylase deficiency will also detect POR deficiency.

The cellular mechanisms by which POR deficiency causes skeletal malformations remain unclear. Four lines of evidence suggest a role for POR-supported cholesterol biosynthesis in bone formation (318). First, cholesterol biosynthesis requires squalene epoxidase, a non-P450 enzyme, and 14 $\alpha$ -demethylase (CYP51), which both require POR (293, 336); 14 $\alpha$ -demethylase activity was reduced in fibroblasts from a patient with ABS and ambiguous genitalia who was subsequently shown to have POR deficiency (314, 337). Second, ABS has been reported in infants whose mothers ingested the antifungal agent fluconazole (338, 339); flu-



conazole acts by inhibiting fungal CYP51 activity. Liver-specific knockout of POR in mice decreases the activities of hepatic drug-metabolizing enzymes (312, 313), thereby potentially rendering some drugs teratogenic. Third, skeletal malformations are found in other disorders of cholesterol biosynthesis such as Smith-Lemli-Opitz syndrome (OMIM 270400). Finally, cholesterol derivatization of hedgehog proteins is required for its signaling in bone formation (340, 341). Two recent studies support this hypothesis. First, tissue-specific POR knockout in the limb bud mesenchyme of mice induces the expression of genes throughout the cholesterol biosynthetic pathway, suggesting that cholesterol deficiency could explain the skeletal phenotypes (342). Second, POR knockdown by RNA interference in rat chondrocytes decreased cell proliferation and differentiation, induced apoptosis, and reduced expression of *Indian hedgehog*, but these effects were reversed by providing cholesterol (343). Thus, cholesterol synthesis is probably involved in the skeletal phenotype of POR deficiency, but other mechanisms may also be operative. Because most clinically used drugs are metabolized by POR-dependent hepatic P450 enzymes, a thorough understanding of the impact of POR mutations and polymorphisms will be needed for a full understanding of the genetic basis of variations in drug metabolism.

### C. Cytochrome $b_5$

Cytochrome  $b_5$  is a small (12–17 kDa) hemoprotein found as a membrane-bound protein in liver and as a soluble protein lacking the C-terminal membrane anchor in erythrocytes. Cytochrome  $b_5$  is expressed in both the adrenals and gonads, where it can interact with P450c17; the adrenal expression is specific to the zona reticularis and may contribute to the genesis of adrenarche (201, 204). Much evidence has shown that cytochrome  $b_5$  can augment some activities of certain P450 enzymes, and the mechanism of this effect has been presumed to involve electron transfer from cytochrome  $b_5$  to the P450 for the second electron during the P450 cycle (344). Although cytochrome  $b_5$  can receive electrons from POR, the redox potentials of cytochrome  $b_5$  and one electron-reduced P450 are unfavorable for cytochrome  $b_5$ -to-P450 electron transfer. Indeed, some of the actions of cytochrome  $b_5$  in experimental systems can be observed with apo-cytochrome  $b_5$  (345) or  $\text{Mn}^{+2}$ - $b_5$  (284) (which do not transfer electrons), including the stimulation of 17,20-lyase activity of human P450c17 (189, 232). These experiments suggest that cytochrome  $b_5$  does not act alone as an electron donor but rather functions in concert with POR to aid catalysis, possibly by an allosteric mechanism promoting the interaction of P450c17 and POR (Fig. 8).

Bovine cytochrome  $b_5$  was one of the first proteins studied by x-ray crystallography, and a wealth of structural

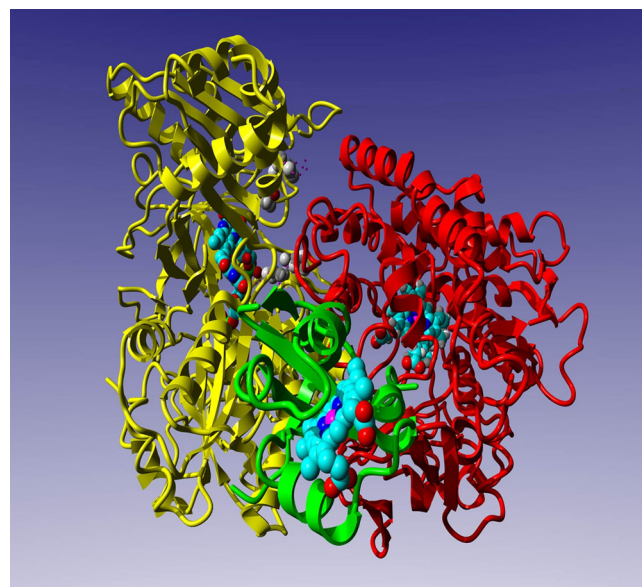

**FIG. 8.** Computational image using the Ribbons program showing the interaction of cytochrome P450c17 (red) with its electron-donating redox partner, (POR) (yellow), facilitated by the allosteric action of cytochrome  $b_5$  (green). The heme groups in P450c17 and cytochrome  $b_5$ , and the NADPH molecule bound to POR, are shown as space-filling models in cyan, whereas the FAD and FMN moieties of POR are shown as ball-and-stick models in white. Note that the heme group in cytochrome  $b_5$  faces out of the plane of the page and does not contact either the POR or P450c17. [Reprinted with permission from A. V. Pandey and W. L. Miller: *J Biol Chem* 280:13265–13271, 2005 (Cover picture of Ref. 289). © American Society for Biochemistry and Molecular Biology.]

data for  $b_5$  have been acquired using molecular dynamics and nuclear magnetic resonance spectroscopy for both the holo- and apo- $b_5$  (346, 347). Analogous to ferredoxin, cytochrome  $b_5$  consists of two domains: a heme-liganding core 1 domain (residues 40 to 65, bovine numbering); and a structural core 2 domain, from which the C-terminal membrane-anchoring helix extends. The heme extends more to the periphery of cytochrome  $b_5$  than does the  $\text{Fe}_2\text{S}_2$  cluster of ferredoxin, and the entire surface is dominated by negatively charged residues rather than just one cluster of negative charges near the heme. In addition, the core 1 domain acquires considerable conformational flexibility in apo- $b_5$ , whereas the core 2 domain remains folded as in holo- $b_5$  (347). Finally, the C-terminal membrane-spanning helix (exiting the core 2 domain) is required to stimulate the 17,20-lyase activity of human P450c17, but the signal peptide is not (348). Genetic and biochemical studies have implicated basic residues in P450c17, including R347, R358, and perhaps R449 and K89, as important for its interaction with cytochrome  $b_5$  (240, 280, 348), whereas E48 and E49 of cytochrome  $b_5$  are required for high 17,20-lyase activity (349). However, the molecular details of how addition of cytochrome  $b_5$  to the P450c17.POR complex augments 17,20-lyase activity are not yet known.

## IX. P450c21: Steroid 21-Hydroxylase

Microsomal P450c21 catalyzes the 21-hydroxylation of the  $\Delta^4$  steroids progesterone to DOC and 17OHP to 11-deoxycortisol in the biosynthesis of mineralocorticoids and glucocorticoids, respectively (Fig. 3). The nature of this reaction has been of great clinical interest because 21-hydroxylase deficiency has an incidence of 1 in 15,000 to 1 in 20,000 births, causing more than 90% of all cases of CAH. The resulting clinical symptoms are complex and potentially devastating. Decreased cortisol and aldosterone synthesis often lead to sodium loss, potassium retention, and hypotension, which can culminate in cardiovascular collapse and death, usually within a month after birth if not treated appropriately. Decreased synthesis of cortisol *in utero* leads to overproduction of ACTH and consequent overstimulation of adrenal steroid synthesis; because the 21-hydroxylase step is impaired, 17OHP accumulates as P450c17 converts very little 17OHP to androstenedione. However, 17-hydroxypregnenolone also accumulates and is readily converted to DHEA, and subsequently to androstenedione and testosterone, resulting in severe prenatal virilization of female fetuses (350–354). Variations in the manifestations of the disease, and especially the identification of patients without apparent defects in mineralocorticoid activity, initially suggested that there were two separate 21 hydroxylating enzymes that were differentially expressed in the zones of the adrenal specifically synthesizing aldosterone or cortisol. However, characterization of the P450c21 protein (355) and gene cloning show there is only one 21-hydroxylase encoded by a single functional gene on chromosome 6p21 (356–359). Because this gene lies in the middle of the major histocompatibility complex locus, disorders of adrenal 21-hydroxylation are closely linked to specific human lymphocyte antigen (HLA) types (360).

The human P450c21 protein, found only in the adrenals, is a microsomal P450 that employs the same POR used by P450c17 to transport electrons from NADPH. Much less is known about the enzymology of P450c21 than of P450c17, but the available evidence suggests that, unlike P450c17, P450c21 is not very sensitive to the abundance of POR or cytochrome *b<sub>5</sub>*. It is clear that genotype consistently predicts phenotype in very severe and very mild cases of 21-hydroxylase deficiency (361, 362). In contrast, patients with P450c21 variants [*e.g.*, the common P30L (363) and V281L mutations and less common mutations R339H and P453S], which have 20 to 50% of wild-type activity (352, 364), can have various phenotypes, implying additional factors that can modify the clinical manifestations of 21-hydroxylase deficiency. Such estimations of activity can vary among dif-

ferent reports, especially when different technologies are used to assess the mutant enzymes.

Extraadrenal 21-hydroxylase activity has also been described in a broad range of adult and fetal tissues (365). However, extraadrenal 21-hydroxylation is not mediated by the P450c21 enzyme found in the adrenal (366), but it appears to be catalyzed by CYP2C9, CYP3A4, CYP2C19, and possibly other enzymes as well (367, 368). Human hepatic CYP2C19 and CYP3A4 can 21-hydroxylate progesterone but not 17OHP and thus may account, in part, for the diminished mineralocorticoid requirements in adult patients (368). As a result, patients having absent adrenal 21-hydroxylase activity may still have appreciable concentrations of 21-hydroxylated steroids in their plasma.

### A. CYP21 genes and the genetics of 21-hydroxylase deficiency

#### 1. 21-Hydroxylase genes

The locus containing the *CYP21* genes is among the most complex in the human genome and explains why 21-hydroxylase deficiency is one of the most common autosomal-recessive diseases. There are two 21-hydroxylase loci, a functional gene formally termed *CYP21A2* and a nonfunctional pseudogene formally termed *CYP21A1P*, which lie on chromosomal locus 6p21.1 in the midst of the HLA locus. These genes, commonly termed *CYP21B* (functional gene) and *CYP21A* (pseudogene), are duplicated in tandem with the *C4A* and *C4B* genes encoding the fourth component of serum complement (369, 370) (Fig. 9). Although the *CYP21A1P* locus is transcribed (371, 372), the resultant RNAs do not encode protein (371); only the *CYP21A2* gene encodes 21-hydroxylase. The *CYP21* genes consist of 10 exons (373), are about 3.4 kb long, and differ in only 87 or 88 of these bases (357–359). This high degree of sequence similarity indicates that these two genes are evolving in tandem through intergenic exchange of DNA. The *Cyp21* genes of mice (374) and cattle (375) are also duplicated and linked to leukocyte antigen loci. However, whereas only the *CYP21A2* gene functions in human beings, only the *cyp21a1* gene functions in mice (376, 377), and both genes function in cattle (378). Sequencing of the gene duplication boundaries shows that the human locus duplicated after mammalian speciation (379), consistent with data that indicate that other mammals have single *CYP21* gene copies (380). Because the HLA locus is highly recombinogenic, exchange between the *CYP21A1P* and *CYP21A2* loci is common. Thus, approximately 75–80% of cases of 21-hydroxylase deficiency derive from micro- or macrogene conversion events where some or all of the *CYP21A1P* pseudogene replaces the corresponding area of the *CYP21A2* gene, thus reduc-

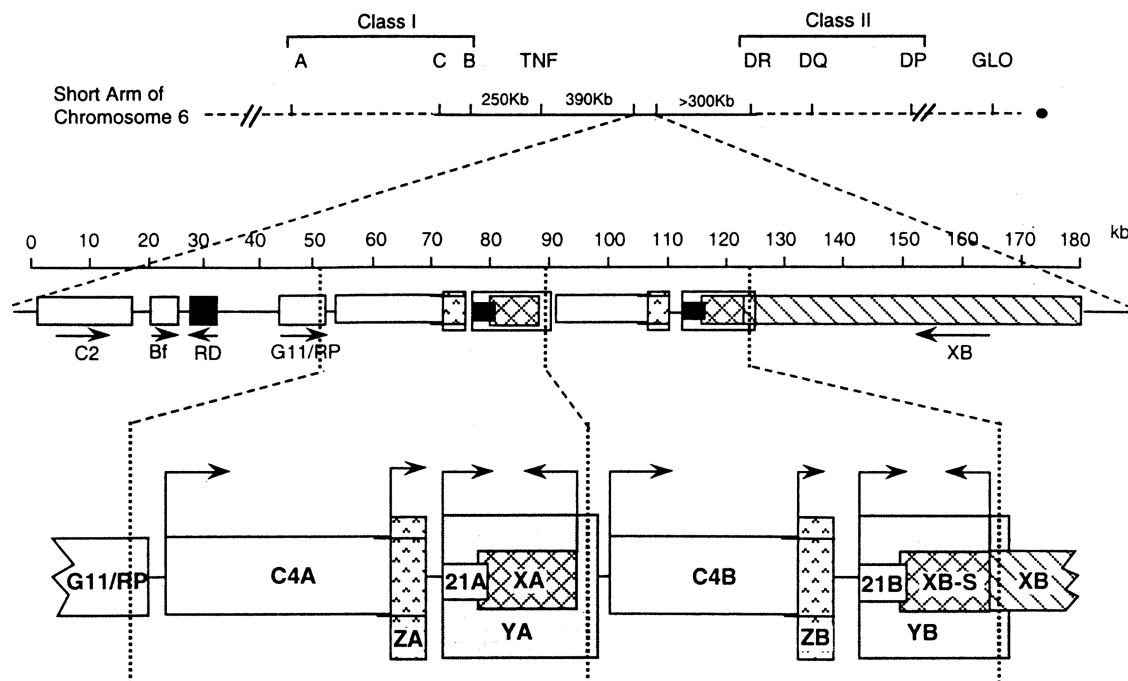

**FIG. 9.** Genetic locus containing the CYP21 genes. The *top line* shows the p21.1 region of chromosome 6, with the telomere to the *left* and the centromere to the *right*. Most HLA genes are found in the class I and class II regions; the class III region containing the CYP21 genes lies between these two. The *second line* shows the scale (in kilobases) for the diagram immediately below, showing (from *left to right*) the genes for complement factor C2, properdin factor Bf, and the RD and G11/RP genes; *arrows* indicate transcriptional orientation. The *bottom line* shows the 21-hydroxylase locus on an expanded scale, including the C4A and C4B genes for the fourth component of complement, the inactive CYP21A pseudogene (CYP21A1P, 21A) and the active CYP21B gene (CYP21A2, 21B) that encodes P450c21. XA, YA, and YB are adrenal-specific transcripts that lack open reading frames. The XB gene encodes the extracellular matrix protein Tenascin-X; XB-S encodes a truncated adrenal-specific form of the Tenascin-X protein whose function is unknown. ZA and ZB are adrenal-specific transcripts that arise within intron 35 of the C4 genes and have open reading frames, but it is not known whether they are translated into protein; however, the promoter elements of these transcripts are essential components of the CYP21A and CYP21B promoters. The *arrows* indicate transcriptional orientation. The *vertical dotted lines* designate the boundaries of the genetic duplication event that led to the presence of A and B regions. [© W. L. Miller.]

ing the expression of the encoded P450c21 protein and/or impairing its activity (352, 381).

The 21-hydroxylase genes lie within the class III region of the major histocompatibility complex locus, permitting HLA typing to be used to track CYP21A2 gene mutations. Salt-losing CAH is associated with HLA-B60 and HLA-40 in some populations (382), and the rare HLA type Bw47 is very strongly associated with salt-losing CAH (383, 384). HLA-Bw51 is associated with simple virilizing CAH in some populations (385), and HLA-B14 is found in approximately 40% of haplotypes for nonclassical CAH carriers (386), often associated with a duplication of the C4B gene (387, 388). HLA-identical individuals in a single family may have different clinical forms of CAH despite HLA identity (389–392), possibly representing extraadrenal 21-hydroxylation, *de novo* mutations, or multiple genetic crossover events.

## 2. Other genes in the 21-hydroxylase locus

At least eight additional genes lie in this locus (393) (Fig. 9). The tandemly duplicated C4A and C4B genes encode isoforms of complement component C4; the C4B protein has substantially more hemolytic activity, despite

having greater than 99% sequence identity with C4A (394). The C4A gene is 22 kb long, but there are long (22 kb) and short (16 kb) forms of C4B due to a variation in one intron (395). The 3' ends of the C4 genes are only 2466 bp upstream from the transcriptional start sites of the CYP21 genes (396). Promoter sequences needed for the transcription of the human CYP21A2 gene lie within intron 35 of the C4B gene (397).

A pair of genes, formally termed TNXA (XA) and TNXB (XB), is duplicated with the C4 and CYP21 genes. These genes lie on the strand of DNA opposite from the C4 and CYP21 genes and overlap the 3' end of CYP21A2. The last exon of XA and XB lies within the 3' untranslated region of exon 10 in CYP21A1P and CYP21A2, respectively (398). The XA gene was truncated during the duplication of the ancestral C4-CYP21-X genetic unit but is transcribed in the adrenal (379). The XB gene encodes a large extracellular matrix protein called Tenascin X that is expressed in most tissues, especially connective tissue (399, 400). The XB gene spans about 65 kb of DNA and includes 43 exons encoding a 12 kb mRNA (399, 401). The XB gene also encodes a short truncated form of



Tenascin-X having unknown function and arising from an intragenic promoter (396). Identification of a CAH patient with a “contiguous gene syndrome” comprising a deletion of both the *CYP21A2* and *XB* genes demonstrated that Tenascin X deficiency results in Ehlers-Danlos syndrome (EDS) (402). Although most forms of EDS are caused by autosomal dominant mutations in collagen genes, recessive forms are caused by mutations in genes for collagen-modifying enzymes, including Tenascin-X, which is associated with and stabilizes collagen fibrils (403, 404). Tenascin-X deficiency causes a clinically distinct, more severe form of EDS, either with or without associated 21-hydroxylase deficiency (405). In addition, RNA transcripts termed YA and YB arise from the *CYP21A2* promoter but do not encode protein (371). Transcripts having an open reading frame, termed ZA and ZB, arise from a promoter element within intron 35 of the *C4* genes, but it is not clear whether they encode protein (406).

## B. 21-Hydroxylase deficiency

21-Hydroxylase deficiency, caused by mutations in *P450c21*, is the most common form of CAH and one of the most common inborn errors of metabolism. Detailed reviews of the physiology, molecular genetics, and clinical management of 21-hydroxylase deficiency are available (350–354, 407–410); we shall confine this review to material that illustrates issues concerning the genetics and biochemistry of *P450c21*, rather than try to summarize the extensive clinical literature concerning this disease.

### 1. Pathophysiology

In the complete absence of *P450c21* activity, inability to convert progesterone to DOC results in aldosterone deficiency causing severe hyponatremia, hyperkalemia, and acidosis with concomitant hypotension, shock, cardiovascular collapse, and death in untreated newborns. Because adrenal blood flow is centripetal, high concentrations of cortisol in the adrenocortical capillary effluent bathes the medulla. These high concentrations of cortisol are needed for transcription of medullary phenylethanolamine N-methyltransferase, which catalyzes the conversion of norepinephrine to epinephrine (411); consequently, patients with CAH have low epinephrine concentrations, exacerbating the risk for hypoglycemia associated with cortisol deficiency (412). The inability to convert 17OHP to 11-deoxycortisol results in cortisol deficiency. The fetal adrenal transiently produces cortisol during the first trimester, apparently minimizing adrenal synthesis of androgen precursors (334). In CAH, low fetal cortisol stimulates ACTH secretion, which stimulates adrenal hyperplasia and transcription of the genes for all the

steroidogenic enzymes, with consequent accumulation of 21-deoxysteroids, some of which are converted to testosterone, resulting in virilization of affected female fetuses. The degree of virilization generally correlates with the severity of the *P450c21* mutation (361). Because normal male fetuses produce abundant testicular testosterone, the additional testosterone produced by adrenals with 21-hydroxylase deficiency does not produce a detectable phenotype.

### 2. Clinical forms and incidence of 21-hydroxylase deficiency

There is a broad spectrum of clinical manifestations of 21-hydroxylase deficiency, generally termed salt-wasting CAH, simple virilizing CAH, and nonclassical CAH. These different forms of 21-hydroxylase deficiency are not different diseases because there is a continuous spectrum of enzymatic impairments and clinical manifestations. Factors other than the specific *P450c21* mutations can influence the clinical phenotype, including the presence of extraadrenal 21-hydroxylation, *P450c21* promoter mutations, and variations in androgen metabolism and sensitivity. These discordances between genotype and phenotype are to be expected.

Salt-wasting CAH is caused by gene deletions, large gene conversions, premature stop codons, frame shifts or other mutations ablating more than 98% of enzyme activity, effectively eliminating both glucocorticoid and mineralocorticoid synthesis. Affected females are frequently diagnosed at birth because of masculinization of the external genitalia, but the clinical signs of salt loss are rarely seen before 5 d of age. After appropriate fluid resuscitation, the mineralocorticoids and glucocorticoids can be replaced orally, and the ambiguous genitalia can be corrected with a series of plastic surgical procedures, but the management is complicated and difficult (408, 410). Affected males are not generally recognized until they have a salt-losing crisis at 5 to 15 d or are detected through newborn screening assays of 17OHP, which are now performed in all states in the United States.

Simple virilizing CAH describes virilized females and clinically unrecognized males who have elevated concentrations of 17OHP but do not suffer a salt-losing crisis. These patients have missense mutations, typically I172N, that retain sufficient activity to produce the small quantities of aldosterone required to maintain salt balance. Because the adrenal normally produces 100 to 1000 times as much cortisol as aldosterone, mild defects in *P450c21* are less likely to affect mineralocorticoid secretion than cortisol secretion. This mildly impaired aldosterone synthesis is reflected physiologically by the increased plasma renin activity seen in these patients after modest salt restriction. In the absence of newborn screening, comparably affected males typically escape diagnosis until age 3 to 7 yr, when



they develop pubic, axillary, and facial hair and phallic growth. These boys grow rapidly and are tall for their age when diagnosed, but their epiphyseal maturation (bone age) advances at a disproportionately rapid rate so that their ultimate adult height is compromised.

Nonclassic CAH, sometimes called cryptic or late-onset CAH, denotes very mild forms of 21-hydroxylase deficiency, most commonly caused by the P450c21 missense mutation V281L (413). The modest overproduction of androgens is asymptomatic in males and evidenced by mild to moderate hirsutism, virilism, menstrual irregularities, and decreased fertility in women (414–417). Some affected persons are identified only by an increased response of plasma 17OHP to ACTH stimulation (415). Nevertheless, these individuals have hormonal evidence of mild mineralocorticoid deficiency, as predicted from the existence of a single adrenal 21-hydroxylase (418), and may have elevated plasma renin activity in response to sodium restriction.

Perinatal screening for elevated concentrations of serum 17OHP has found that the incidence of salt-wasting plus simple virilizing CAH is about 1 in 14,000, yielding a heterozygous carrier rate of 1 in 60 (419). The screening of 1.9 million Texas newborns yielded an overall incidence of 1 in 16,000 (1 in 15,600 Caucasians, 1 in 14,500 Hispanics, and 1 in 42,300 African-Americans) (420). Nonclassical CAH is much more common, but the prevalence varies among populations. One group has reported very high incidences: 1 in 27 for Ashkenazi Jews, 1 in 53 for Hispanics, 1 in 63 for Yugoslavs, 1 in 333 for Italians, and 1 in 1000 for other whites (421–423). Other studies found carrier rates of 1.2% (416) to 6% (424, 425) for Caucasian populations that were not subdivided further. The considerable differences in the reported incidences reflect differences in the small populations examined and the difficulty in distinguishing nonclassical CAH from heterozygous carriers of classical CAH.

### C. Molecular genetics of 21-hydroxylase deficiency

21-Hydroxylase deficiency is caused by gene deletions, gene conversions, and apparent point mutations. Most apparent point mutations in *CYP21A2* are actually small gene conversion events (350, 351, 426), so that gene conversions account for about 85% of the lesions in 21-hydroxylase deficiency. Most patients with 21-hydroxylase deficiency are compound heterozygotes, having different lesions on their two alleles. Gene deletions and large conversions eliminate all *CYP21A2* gene transcription; hence, homozygotes will have salt-losing CAH. Microconversions creating frame shifts or premature translational termination also cause salt-losing CAH. Simple virilizing and nonclassical CAH are associated with amino acid replacements in the P450c21 protein caused by microconversion

events. Affected patients are usually compound heterozygotes bearing a severely defective allele and a mildly impaired allele so that the clinical manifestations are based on the nature of the more active allele.

Two unusual and related features of the 21-hydroxylase locus complicate its analysis. First, the gene deletions in this locus are quite unusual in that they extend 30 kb from one of several points in the middle of *CYP21A1P* to the precisely homologous point in *CYP21A2*. Second, gene conversions are extremely common in this locus (388, 427). If a segment of gene A replaces the corresponding segment of the related gene B, the structure of recipient gene B is said to be “converted” to that of donor gene A. The hallmark of gene conversion is that the number of closely related genes remains constant, whereas their diversity decreases (428). Two types of gene conversions commonly cause 21-hydroxylase deficiency: large gene conversions that can be mistaken for gene deletions, and small microconversions that resemble point mutations. Depending on the populations examined, different reports find small or large numbers of gene deletions (427, 429, 430). Combining multiple studies shows that about 19% of mutant alleles have gene deletions, 8% have large gene conversions, 67% have microconversions, and 6% have uncharacterized lesions (351) (Fig. 10). A careful study of 155 German patients confirmed these results, finding gene deletions in 20.3%, large gene conversions in 7.1%, microconversions in 71.3% (intron 2 mutation in 30.3%; I172N in 19.7%), and uncharacterized mutations in 1.3% (381). A huge study of 3200 patients in France found the intron 2 mutation in 30%, deletions and large gene conversions in 25%, I172N in 17%, and Q318X in 7% of alleles causing classic CAH, and, in nonclassic CAH, V281L was found in 55%, intron 2 in 9%, large rearrangements in 8%, I172N in 4%, and Q318X in 3%

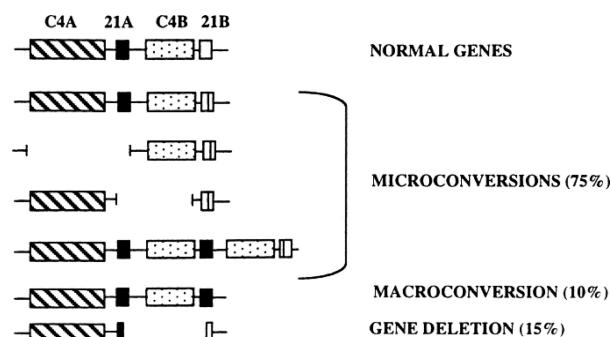

**FIG. 10.** Genetic rearrangements causing 21-hydroxylase deficiency. Deletions or duplications of the C4A and C4B genes can occur with or without associated lesions in the *CYP21B* gene. Note that all point mutations in *CYP21B* are actually microconversions. Some authors combine the gene deletion and macroconversion groups because these are difficult to distinguish by Southern blotting as both result in a loss of the *CYP21B* gene, but the genotypes are distinct, as shown. [© W. L. Miller.]

(431). However, there is ascertainment bias in favor of more severely affected patients (388) and most studies address populations primarily of European origin. Thus, the available statistics are weighted in favor of gene deletions and large conversions, which cause the salt-wasting phenotype. About 75% of mutated *CYP21* genes are structurally intact by Southern blotting and thus appear to carry point mutations (388, 427). Many mutant *CYP21* genes have been sequenced, showing that a relatively small number of mutations that are also found in the *CYP21A1P* pseudogene cause most cases of CAH, so that most apparent point mutations are actually microconversions (350, 351, 426, 427) (Table 3).

Three changes in the pseudogene (8 bp deletion, exon 3; T insertion, exon 7; Gly 318 stop, exon 8) render its product nonfunctional. Each change results in an altered reading frame and/or premature stop codon, eliminating all activity; all of these have been found in *CYP21A2* alleles that cause salt-losing CAH. Three closely clustered base changes alter the normal amino acid sequence Ile-Val-Glu-Met at codons 236 to 239 in exon 6 to Asn-Glu-Glu-Lys in both the pseudogene and in a small number of alleles causing severe salt-losing CAH. The most common lesion in classical CAH is an A→G change in intron 2, 13 bases upstream from the 3' splice acceptor site of this intron (432). This microconversion, which is found in over 25% of severely affected CAH alleles, causes abnormal mRNA splicing, so that a normal protein cannot be produced. However, a small portion of this mRNA may be spliced normally in some patients so that the phenotype is variable; most such patients are salt losers, but some have simple virilizing CAH. This intron 2 microconversion is often associated with the Ser/Thr polymorphism at codon 268; this is a true polymorphism because S268T does not

alter enzymatic activity (433). The microconversion R356W, which is found in about 10% of severely affected alleles (434), eliminates virtually all detectable activity (435), apparently because it changes a residue in the binding site for POR. Other rare alleles, which are true mutations rather than gene conversions, have been described in single individuals (436–440).

The microconversion I172N is the most common cause of simple virilizing CAH (436, 441, 442). Ile 172 is an evolutionarily conserved residue that may contribute to the correct conformation of the enzyme. When Ile 172 was changed to Asn, Leu, Gln, or His, the mutants yielded only 3 to 7% of wild-type 21-hydroxylase activity (435, 443). The microconversion P30L is generally associated with nonclassical CAH but is found in some patients with simple virilizing CAH. The P30L/null compound heterozygotes have a very severe and variable form of nonclassical CAH, with minimal virilization at birth but marked androgen excess in postnatal life.

The most common mutation causing nonclassical CAH is V281L (413). This mutation does not alter the affinity of the enzyme for substrate but drastically reduces its  $V_{\max}$  (444). The microconversion P30L is found in about 15 to 20% of nonclassic alleles. In addition, the mutations R339H and P453S have been associated with nonclassical CAH (364, 445). Examination of a large number of *CYP21A1P* pseudogenes showed that the P453S mutation is polymorphic in about 20% of pseudogenes, and hence also represents a microconversion event.

Each missense mutation appears to occur in a functional domain of P450c21 (440). By analogy with the computationally inferred structure of P450c17 (240), Arg 356 appears to be part of the redox-partner-binding site, Val 281 appears to participate in coordinating the heme moiety, and Cys 428 is the crucial cysteine residue in the heme-binding site found in all cytochrome P450 enzymes. The N-terminal region of P450c21, including Pro30, appears to be required for membrane insertion and enzyme stability (446). Finding most mutations in the amino-terminal portion of P450c21 is consistent with finding most gene conversion and gene deletion events occurring in exons 1–8 of the *CYP21A2* gene. Changes in exons 9 and 10 are very rare, possibly as a result of evolutionary pressure to retain the overlapping 3' end of the Tenascin X gene (398, 399).

**TABLE 3.** Microconversions of the *CYP21A2* gene that cause 21-hydroxylase deficiency

| Mutation          | Location | Associated phenotypes | Activity (%) |
|-------------------|----------|-----------------------|--------------|
| Pro 30→Leu        | Exon 1   | NC/SV                 | 30–60        |
| A→G               | Intron 2 | SV/SW                 | Minimal      |
| 8-bp deletion     | Exon 3   | SW                    | 0            |
| Ile 172→Asn       | Exon 4   | SV                    | 3–7          |
| Ile 236→Asp       | Exon 6   | SW                    | 0            |
| Val 237→Glu       |          |                       |              |
| Met 239→Lys       |          |                       |              |
| Val 281→Leu       | Exon 7   | NC                    | 18 ± 9       |
| Gly 292→Ser       | Exon 7   | SW                    |              |
| T insertion @ 306 | Exon 7   | SW                    | 0            |
| Gly 318→Stop      | Exon 8   | SW                    | 0            |
| Arg 339→His       | Exon 8   | NC                    | 20–50        |
| Arg 356→Trp       | Exon 8   | SV/SW                 | 2            |
| Pro 453→Ser       | Exon 10  | NC                    | 20–50        |
| GG→C @ 484        | Exon 10  | SW                    | 0            |

NC, Nonclassic; SV, simple virilizing; SW, salt wasting. © W. L. Miller.

## X. Isozymes of P450c11: P450c11 $\beta$ and P450c11A5

### A. Isozymes of P450c11

The final steps in the synthesis of glucocorticoids and mineralocorticoids are catalyzed by two closely related

mitochondrial enzymes, P450c11 $\beta$  and P450c11AS (447, 448). These two human isozymes are encoded by tandemly duplicated genes on chromosome 8q21–22 that have 93% amino acid sequence identity (449). There are substantial differences in this enzyme system among various mammals. Cattle have a single enzyme (450) encoded by a single gene (451) that catalyzes the 11 $\beta$ -hydroxylation of 11-deoxycortisol to cortisol, and all three steps required for the synthesis of aldosterone from DOC: 11 $\beta$ -hydroxylase, 18-hydroxylase, and 18 methyl oxidase activities. By contrast, the human genome has two genes named *CYP11B1* and *CYP11B2* (449) that encode P450c11 $\beta$  (11 $\beta$ -hydroxylase) and P450c11AS (aldosterone synthase), respectively, and rats (but not mice) have three functional *CYP11B* genes (452). The *CYP11B1* and *CYP11B2* genes are located about 40 kb apart on chromosome 8q24.3 and share the same intron/exon structure common to all mitochondrial P450 genes. Both forms of P450c11 are found on the IMM and use ferredoxin and ferredoxin reductase to receive electrons from NADPH to mediate catalysis (453). By far the more abundant of the two isozymes is P450c11 $\beta$ , which is the classical 11 $\beta$ -hydroxylase that converts 11-deoxycortisol to cortisol and DOC to corticosterone, and is expressed predominantly in the zona fasciculata, and to a lesser extent in the zona reticularis, but not in the zona glomerulosa (454). P450c11 $\beta$  expression is induced by ACTH via cAMP and is suppressed by glucocorticoids. The less abundant isozyme, P450c11AS, is found only in the zona glomerulosa, where it has 11 $\beta$ -hydroxylase, 18-hydroxylase, and 18-methyl oxidase (aldosterone synthase) activities; thus, P450c11AS is able to catalyze all the reactions needed to convert DOC to aldosterone (455–457). Both enzymes can convert DOC to corticosterone and corticosterone to 18OH-corticosterone, but only P450c11AS can synthesize aldosterone from 18OH-corticosterone. The weak 18-hydroxylase activity of P450c11 $\beta$  (458) explains why an adrenal with suppressed P450c11AS expression continues to synthesize 18OH-corticosterone (459). Transcription of the *CYP11B2* gene encoding P450c11AS is induced by potassium and angiotensin II activation of the protein kinase C pathway (460), and requires the transcription factors SF1, NURR1 and NGFIB (461) and possibly other factors (462). Because P450c11AS is normally restricted to the zona glomerulosa, where 17 $\alpha$ -hydroxylase activity is absent, the repertoire of steroids that can undergo 18-oxygenation is limited.

## B. Overview of lesions in isozymes of P450c11

Patients with disorders in P450c11 $\beta$  have classical 11 $\beta$ -hydroxylase deficiency but can still produce aldosterone (463), whereas patients with disorders in P450c11AS have rare forms of aldosterone deficiency (so-called corticoste-

rone methyl oxidase deficiency) while retaining the ability to produce cortisol (464–466). The clinical descriptions of distinct deficiency syndromes for 11 $\beta$ -hydroxylase, 18-hydroxylase (also called corticosterone methyl oxidase I or CMOI), and 18-oxidase (CMOII) were initially interpreted to mean that three separate enzymes catalyzed these three reactions (467, 468). Mutations in *CYP11B1* cause 11 $\beta$ -hydroxylase deficiency isolated to the zonae fasciculata and reticularis (463), whereas defects in *CYP11B2* cause both CMOI or CMOII deficiencies (447). Thus, severe defects can impair all P450c11AS activities, leading to the clinical phenotype of CMOI deficiency (456), whereas P450c11 $\beta$  provides 11 $\beta$ -hydroxylase activity in the zona fasciculata.

## C. 11 $\beta$ -Hydroxylase deficiency

P450c11 $\beta$  catalyzes the 11 $\beta$ -hydroxylation of 11-deoxycortisol to cortisol and that of DOC to corticosterone in the fasciculata, catalyzes some 18-hydroxylation, but has no 18-methyl oxidase activity. Deficient P450c11 $\beta$  activity accounts for about 5–8% of CAH in persons of European ancestry (469) but accounts for about 15% of cases in both Muslim and Jewish Middle Eastern populations (470). Severe deficiency of P450c11 $\beta$  decreases the secretion of cortisol, causing CAH and virilization of affected females. The defect in the pathway to cortisol results in accumulation of 11-deoxycortisol, and the defect in the 17-deoxy pathway in the synthesis of corticosterone in the fasciculata leads to overproduction of DOC, potentially leading to mineralocorticoid-based hypertension. Although DOC is less potent than aldosterone, patients with 11 $\beta$ -hydroxylase deficiency may secrete it at high levels, so that salt is retained and the serum sodium remains normal. Although overproduction of DOC can cause hypertension, affected newborns may have mild, transient salt loss (470, 471), presumably because normal newborns are relatively resistant to mineralocorticoids (Fig. 11). DOC concentrations, serum potassium, and blood pressure generally correlate poorly with the degree of virilization in affected females or the cardiovascular manifestations (472). Newborns may also have elevated concentrations of 17OHP, which accumulates two steps behind the enzymatic block, presumably because high concentrations of 11-deoxycortisol inhibit P450c21, so that P450c11 $\beta$  deficiency may be detected in newborn screening for P450c21 deficiency (420, 473, 474). The diagnosis is established by elevated basal concentrations of DOC and 11-deoxycortisol, which hyperrespond to cosyntropin (475).

The *CYP11B1* mutations causing 11 $\beta$ -hydroxylase deficiency have been reviewed recently (476). The mutation R448H was found on 11 of 12 affected alleles among Sephardic Jews of Moroccan ancestry (463), Q356X and



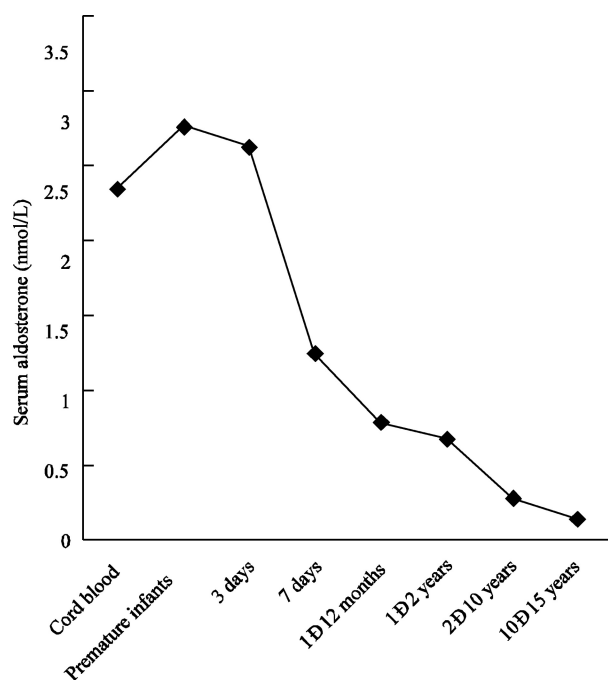

FIG. 11. Concentrations of aldosterone as a function of age. [© W. L. Miller.]

G379V were the only mutations found among 15 unrelated Tunisian patients (477), and other mutations have also been described in other populations (447). A mild, nonclassic form of  $11\beta$ -hydroxylase deficiency was found in otherwise asymptomatic women with hirsutism, virilism, and menstrual irregularities (470, 478), but this phenotype is rare: only two of five hyperandrogenemic women with elevated 11-deoxycortisol had CYP11B1 mutations that retained partial activity (479).

#### D. Aldosterone synthase deficiencies

Disorders of P450c11AS cause aldosterone synthase deficiency, formerly termed corticosterone methyl oxidase (CMO) deficiencies, in which aldosterone biosynthesis is impaired whereas the zona fasciculata and reticularis continue to produce corticosterone and DOC. The absence of aldosterone biosynthesis will generally result in a salt-wasting crisis in infancy, at which time the normal secretory rate of DOC is insufficient to meet the newborn's mineralocorticoid requirements. These patients may recover spontaneously and grow to adulthood without therapy, probably reflecting the increasing sensitivity to mineralocorticoid action and sodium intake with advancing age (480, 481) (Fig. 11). Consistent with this, plasma renin activity is markedly elevated in affected children but may be normal in affected adults (482).

CMOI deficiency results from a complete loss of P450c11AS activity, eliminating 18-hydroxylase or 18-methyl oxidase activities and consequent biosynthesis of 18OH-corticosterone and aldosterone, while preserv-

ing the biosynthesis of corticosterone and cortisol by P450c11 $\beta$ . The diagnosis for CMOI deficiency is based on an increased ratio of corticosterone to 18OH-corticosterone with suppressed aldosterone despite elevated plasma renin activity (465). Few cases of CMOI deficiency have been fully characterized genetically, including a frameshift mutation (483), a premature stop codon (484), and the missense mutation R384P (485).

CMOII deficiency, characterized by increased concentrations of 18OH-corticosterone and very low concentrations of aldosterone, results from amino acid replacements in P450c11AS that selectively delete the 18-methyl oxidase activity while preserving 18-hydroxylase activity. CMOII deficiency is common in Sephardic Jews of Iranian origin, where affected individuals are homozygous for two different mutations, R181W and V386A; individuals homozygous for only one of these mutations were clinically unaffected; both mutations are required to cause disease (464).

There is clinical and genetic overlap between CMOI and CMOII. One patient with findings of CMOII had two mutations on each parental allele: the mother's allele carried R181W and a deletion/frame-shift mutation that deleted all activity; the father's allele carried T318M and V386A (466). T318 is a highly conserved Thr residue that participates in cleavage of the dioxygen bond of  $O_2$  in all P450 enzymes to create the iron-oxy intermediate required for P450 catalysis (486). When the T318M/V386A double mutant was recreated *in vitro*, there was no detectable activity, yet the patient had CMOII rather than CMOI as predicted by the *in vitro* findings (466). Similarly, a patient with apparent CMOI was homozygous for the mutations E198A and V386A, yet when assayed *in vitro* the double mutant enzyme behaved similarly to the mutant enzyme found in the Iranian Jewish CMOII patients (487). This patient also carried R173K, a normally occurring polymorphism that does not change the enzyme's  $K_m$  or  $V_{max}$  (488). Thus, the distinction between CMOI and CMOII is not precise, and these disorders should be regarded as different degrees of severity on a continuous clinical spectrum.

Although the two CYP11B genes are reminiscent of the genetic anatomy of the CYP21A1P and CYP21A2 genes, gene conversions are rare. Only one gene conversion causing CMO II deficiency has been described (489), probably due to the higher recombinational frequency in the HLA region carrying the CYP21 genes.

#### E. Glucocorticoid-remediable aldosteronism

Although gene conversion events in the CYP11B locus are rare, an unusual gene duplication, caused by unequal crossing over between the CYP11B1 and CYP11B2 genes, results in glucocorticoid-remediable aldosteronism

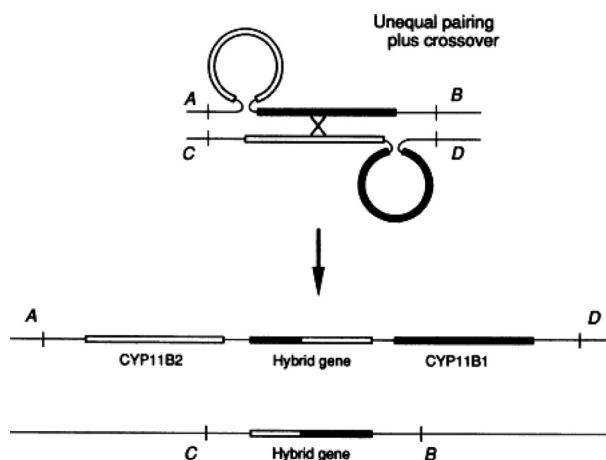

**FIG. 12.** Molecular genetics of GRA. Unequal crossing over of the *CYP11B2* and *CYP11B1* genes yields a chimeric gene with the regulatory sequences of the *CYP11B1* promoter (ACTH responsiveness in the zona glomerulosa; filled bar) driving the expression of an enzyme with *CYP11B2* sequences, encoding aldosterone synthase activities (unfilled bar). [Figure provided courtesy of Prof. Perrin C. White. (University of Texas Southwestern Medical Center, Dallas, TX)].

(GRA) (490–492). The crossover results in one allele having a third, hybrid *CYP11B* gene in which the ACTH-regulated promoter and the first few exons of *CYP11B1* are fused in frame to most of the exons of *CYP11B2*, resulting in the zona fasciculata expression of a chimeric protein with aldosterone synthase activity (490, 491) (Fig. 12). Crossover has been described in intron 2, intron 3, and exon 4 (491), and the corresponding deleted allele, causing 11-hydroxylase deficiency, has been described (493). As a result, ACTH stimulates the production of an enzyme with 18-hydroxylase and 18-oxidase activities, leading to increased production of aldosterone and 18-oxygenated metabolites of cortisol. The overproduction of aldosterone causes mineralocorticoid hypertension and suppresses plasma renin activity. Because the expression of this hybrid gene is ACTH-responsive, it can be suppressed by glucocorticoids such as dexamethasone, which is used for diagnosis and treatment (494). GRA may account for up to 2% of patients with hypertension (495).

Studies of the crossover sites in different patients with GRA, as well as construction of hybrid and site-directed mutants *in vitro*, have permitted the precise identification of the P450c11AS residues that are specifically required for the 18-oxygenase activity. Residues 288, 296, 301, 302, 325, and, perhaps most importantly, 320 are critical (496, 497). Thus, genetic crossovers 3' to codon 320 will create a hybrid protein that lacks aldosterone synthase activity, and hence will not cause GRA. These key residues lie in or near the I-helix, which contains the catalytically important T318 residue implicated in oxygen activation for almost all P450s (486); thus, these mutations would be expected to alter active site geometry.

Localized microconversions, similar to those that cause most cases of 21-hydroxylase deficiency, might insert sequences crucial for aldosterone synthase activity into the gene encoding P450c11 $\beta$ . Studies *in vitro* suggest that changing Ser288 and Val320 would suffice (497), and artificial activating mutations that increase the aldosterone synthase activity of P450c11AS have been created *in vitro* (498). However, most patients with low-renin hypertension, other than those with glucocorticoid suppressible hypertension, lack mutations in this locus (458, 488, 499).

## XI. Isozymes of 17 $\beta$ -Hydroxysteroid Dehydrogenase

Multiple reactions are catalyzed by a group of enzymes collectively known as the 17 $\beta$ -hydroxysteroid dehydrogenases (17 $\beta$ HSDs), sometimes also termed 17-oxidoreductases or 17-ketosteroid reductases (500, 501). These reactions included the interconversions of androstenedione and testosterone, DHEA and androsta-5-ene-3 $\beta$ ,17 $\beta$ -diol, estrone and estradiol, androsterone and 5 $\alpha$ -androstanedione and 5 $\alpha$ -DHT, and others. The terminologies for these enzymes vary, depending on the direction of the reaction being considered. These enzymes are often confusing because: 1) there are several different 17 $\beta$ HSDs; 2) some are preferential oxidases, whereas others are preferential reductases; 3) they differ in their substrate preference and sites of expression; 4) there is inconsistent nomenclature, especially with the rodent enzymes; and 5) some proteins termed 17 $\beta$ HSDs actually have very little 17 $\beta$ HSD activity and are principally involved in other reactions (50). There are at least 14 human 17 $\beta$ HSD isoforms; these isoforms vary widely in size, structure, substrate specificity, cofactor utilization, and physiological functions (502). Only those most important in normal steroidogenesis are discussed here (Table 4).

### A. 17 $\beta$ HSD type 1

The interconversion of estrone and estradiol by 17 $\beta$ HSD1 has been studied more extensively than any other human steroidogenic enzyme. 17 $\beta$ HSD1, also known as estrogenic 17 $\beta$ HSD, is a cytosolic reductive SDR enzyme that uses NADPH as its cofactor to catalyze reductase activity and is a dimer of 34-kDa subunits. In the late 1980s, three independent groups reported the cloning of its cDNA, the first of any human HSD (503–505). The *HSD17B1* gene is located on chromosome 17q11-q21 (506) adjacent to a pseudogene and encodes a 34-kDa protein that is expressed primarily in the placenta and in ovarian granulosa cells of developing follicles (506). 17 $\beta$ HSD1, which is active only as a dimer, primarily ac-

**TABLE 4.** Principal oxidative and reductive steroidogenic reactions catalyzed by 17βHSD types 1–6

| 17βHSD type                             | Type 1    | Type 2           | Type 3    | Type 4           | Type 5    | Type 6           |
|-----------------------------------------|-----------|------------------|-----------|------------------|-----------|------------------|
| Other names                             |           |                  |           |                  | AKR1C3    | RODH             |
| Preferred direction                     | Reduction | Oxidation        | Reduction | Oxidation        | Reduction | Oxidation        |
| Favored cofactor in intact cells        | NADPH     | NAD <sup>+</sup> | NADPH     | NAD <sup>+</sup> | NADPH     | NAD <sup>+</sup> |
| Estrone → estradiol                     | Major     |                  | Minor     |                  |           |                  |
| Estradiol → estrone                     |           | Major            |           | Trace            |           |                  |
| 16OH-estrone → estriol                  | Major     |                  |           |                  |           |                  |
| Estriol → 16OH-estrone                  |           | Major            |           | Trace            |           |                  |
| DHEA → androstenediol                   | Modest    |                  | Modest    |                  |           |                  |
| Androstenedione → testosterone          | Trace     |                  | Major     |                  | Minor     |                  |
| Testosterone → androstenedione          |           | Major            |           | Trace            |           |                  |
| DHT → 5α-androstane-3,20dione           |           | Major            |           | Trace            |           |                  |
| 5α-Androstane-3,20dione → DHT           |           |                  | Major     |                  |           | Modest           |
| DHT → 5α-androstane-3α,17βdiol          |           |                  |           |                  | Modest    |                  |
| 5α-Androstane-3α,17βdiol → DHT          |           |                  |           |                  |           | Modest           |
| 5α-Androstane-3α,17βdiol → androsterone |           | Modest           |           |                  |           |                  |
| Androsterone → 5α-androstane 3,20dione  |           |                  |           |                  |           | Modest           |

These enzymes catalyze other reactions as well: 17βHSD6 (RODH) also acts as an isomerase with modest activity to convert 5α-androstane 3α,17βdiol to 5α-androstane 3β,17βdiol and androsterone to 3β-androsterone. © W. L. Miller and R. J. Auchus.

cepts steroid substrates with an aromatic A ring, so that it primarily activates estrone to estradiol, although it also has low activity for the conversion of androstenedione to testosterone and DHEA to androsta-5-ene-3β,17β-diol (507). Although 17βHSD1 can oxidize 17β-hydroxysteroids in the presence of NAD<sup>+</sup> *in vitro* at high pH, the enzyme functions *in vivo* to reduce estrone to estradiol and 16α-hydroxyestrone to estriol (507).

Attempts to identify active site residues using affinity labels and mechanism-based inactivators were reported in 1988 (508), and sequence alignments with other SDR enzymes identified the Tyr-X-X-X-Lys active-site motif at residues 155 to 159 (509), which was then confirmed by crystallography (510, 511). The structure shows that the NADPH cofactor lies across the β-sheet core of the protein in the Rossman fold characteristic of all SDR enzymes. The steroid appears to dangle from the top of the enzyme almost perpendicular to the cofactor, with a hydrophobic pocket holding the body of the steroid in place while the steroid 3-OH group forms hydrogen bonds with His 221 and Glu 282. Where the steroid and cofactor meet, Ser 142, Tyr 155, and Lys 159 help to form a proton-relay system that drives catalysis.

Because estrogen biosynthesis preferentially occurs by the aromatization of androstenedione to estrone, 17βHSD1 appears to be required for the conversion of estrone to biologically active estradiol in the ovary and placenta (506). However, no cases of human 17βHSD1 deficiency have been reported; hence, this role has not been proven unequivocally. One would predict that 17βHSD1 deficiency would be compatible with life because fetuses that cannot produce estrogens because of aromatase deficiency or that have estrogen insensitivity (ER<sub>α</sub> muta-

tions) are viable (327). Nevertheless, 17βHSD1 is probably critical for ovulation and may be important in the pathogenesis and progression of estrogen-dependent breast cancers (512).

**B. 17βHSD type 2**

17βHSD2 is a microsomal oxidase that uses NAD<sup>+</sup> to inactivate both androgens and estrogens. In contrast to the “activating” role of 17βHSD1 in the placenta and ovary, human endometrium inactivates estradiol by its conversion to estrone. This activity, which is induced by progestins, is not attributable to 17βHSD1, because 17βHSD1 mRNA is not detected in the human uterus (506). Instead, a cDNA encoding microsomal *HSD17B2* was cloned (513) and found to be expressed in endometrium, placenta, and other tissues (514). In contrast to 17βHSD1, which is found in placental syncytiotrophoblast cells, 17βHSD2 is expressed in endothelial cells of placental intravillous vessels, consistent with its apparent role in defending the fetal circulation from transplacental passage of maternal estradiol or testosterone (515). 17βHSD2 inactivates sex steroids by oxidizing them to their inactive 17-ketosteroid homolog: estradiol to estrone, testosterone to androstenedione, and DHT to 5α-androstanedione. The widespread tissue distribution and broad substrate specificity of 17βHSD2 suggests that its role in human physiology is to protect tissues from excessive exposure to active steroid hormones by oxidation to inactive 17-ketosteroids (502). This role is somewhat speculative because no human deficiency of 17βHSD2 has been described. 17βHSD2 also oxidizes 20α-dihydroprogesterone to progesterone, but this activity is low relative to its 17βHSD activity (513).



### C. 17 $\beta$ HSD type 3

17 $\beta$ HSD3, the androgenic form of 17 $\beta$ HSD, is a 310-amino acid microsomal enzyme that is expressed almost exclusively in the testis (516). Relatively little is known about the enzymology of 17 $\beta$ HSD3, partly because it is a very hydrophobic protein, hampering its expression and purification from bacteria. In transiently transfected HEK-293 cells, human 17 $\beta$ HSD3 reduces DHEA, 5 $\alpha$ -androstenedione, and androsterone, the C<sub>19</sub> 17-ketosteroids that serve as precursors of testosterone and DHT (517). The conversion of DHEA to androsta-5-ene-3 $\beta$ ,17 $\beta$ -diol by 17 $\beta$ HSD3 may contribute significantly to testicular testosterone synthesis (238). Estrogens are poor substrates for human 17 $\beta$ HSD3 (507).

When the cDNA derived from the 67-kb gene for 17 $\beta$ HSD3 was cloned, patients with 17-ketosteroid reductase deficiency were found to harbor mutations in this *HSD17B3* gene (516–518), proving the central role of this enzyme in male sexual differentiation. 17 $\beta$ HSD3 is the only 17 $\beta$ HSD enzyme whose role in human physiology is genetically established by a deficiency syndrome. Children with 17 $\beta$ HSD3 deficiency, which manifests as a disorder of sexual development only in 46,XY infants, make small amounts of testosterone, indicating that other human 17 $\beta$ HSD enzymes can convert androstenedione to testosterone—but not enough to compensate for 17 $\beta$ HSD3 deficiency during fetal development. Infants with 17 $\beta$ HSD3 deficiency have varying degrees of hypospadias and micropenis with intraabdominal or inguinal testes. The presentation is thus indistinguishable from that of partial androgen insensitivity syndrome or 5 $\alpha$ -reductase type 2 deficiency, with most newborns assigned a female sex of rearing (518). Diagnosing the cause of disordered sexual development in an undervirilized 46,XY male is among the most challenging tasks in pediatric endocrinology, and distinguishing among these three diagnoses, despite detailed serum steroid analyses after hCG stimulation, remains problematic. Molecular genetic testing helps to establish the diagnosis, which has implications for management of the adolescent (518). As in 5 $\alpha$ -reductase type 2 deficiency, children with 17 $\beta$ HSD3 deficiency and functional testes begin to virilize at puberty, and these patients sometimes adopt the male gender as adults. Affected 46,XX girls are normal, and women with 17 $\beta$ HSD3 deficiency produce normal amounts of androgens and estrogens, indicating that the human ovary still produces testosterone in the absence of 17 $\beta$ HSD3 expression (519).

### D. 17 $\beta$ HSD type 4

Many additional HSD isoforms have been described, but their activities for steroids are generally poor. An enzyme termed 17 $\beta$ HSD4 was initially identified as an NAD<sup>+</sup>-dependent oxidase with activities similar to 17 $\beta$ HSD2 (520),

but this trifunctional protein is located in peroxisomes (520) and is primarily an enoyl-CoA hydratase and 3-hydroxyacyl-CoA dehydrogenase (521, 522); its (oxidative) HSD activity toward estradiol is 10<sup>6</sup> times slower than its 3-hydroxyacyl-CoA dehydrogenase activity (523). Deficiency of 17 $\beta$ HSD4 causes a form of Zellweger syndrome, in which bile acid synthesis is disturbed but steroidogenesis is not affected (522). Thus, this enzyme has some 17 $\beta$ HSD activity, but steroidogenesis is not its principal physiological function.

### E. 17 $\beta$ HSD type 5

17 $\beta$ HSD5, originally cloned as a 3 $\alpha$ -HSD (524, 525), is an AKR enzyme (AKR1C3), unlike 17 $\beta$ HSD types 1 to 4, which are SDR enzymes. 17 $\beta$ HSD5 catalyzes the reduction of androstenedione to testosterone (524, 526), and is expressed in both steroidogenic and nonsteroidogenic tissues (525, 526). The nature of 17 $\beta$ HSD5 has been confusing because of its multiple activities and inconsistent results from different laboratories. Originally described as hepatic 3 $\alpha$ -HSD type 2 for its ability to reduce DHT to 3 $\alpha$ -androstenediol (525), this protein was later found to also have 17 $\beta$ HSD activity, including reducing androstenedione to testosterone (527). 17 $\beta$ HSD5 may account for much of the extratesticular, peripheral conversion of androstenedione to testosterone, although its catalytic efficiency as a 17 $\beta$ HSD is poor (528) compared with its 20 $\alpha$ HSD activity with progesterone and DOC (520) or its prostaglandin dehydrogenase activity, reducing prostaglandin H<sub>2</sub> to prostaglandin F<sub>2 $\alpha$</sub>  (529). Nevertheless, 17 $\beta$ HSD5/AKR1C3 is more highly expressed in the human fetal adrenal during the time of sexual differentiation than 17 $\beta$ HSD3 (334) and may participate in adrenal testosterone production, particularly in virilizing CAHs. The postnatal adrenal also expresses 17 $\beta$ HSD5 in the zona reticularis and accounts for the small amount of testosterone directly produced by the adrenal glands (530).

### F. 17 $\beta$ HSD type 6

17 $\beta$ HSD type 6 is also known as RODH for its homology to retinol dehydrogenase enzymes and as 3-hydroxysteroid epimerase for its ability to convert 3 $\alpha$ -hydroxysteroids to their 3 $\beta$ -hydroxysteroid epimers via 3-ketosteroid intermediates (531, 532). Encoded by the *HSD17B6* gene on chromosome 12q13.3, this enzyme catalyzes oxidative 3 $\alpha$ HSD activities and converts androstenediol to DHT in the prostate (533). The role of RODH as the potential oxidative 3 $\alpha$ HSD in the testicular alternative pathway to DHT is probable but not proven.

## XII. P450aro: Aromatase

Estrogens are produced by the aromatization of androgens, including those derived from adrenal steroidogene-

sis, by a complex series of reactions catalyzed by a single microsomal aromatase, P450aro (327, 535, 536). This typical cytochrome P450 is encoded by a single gene on chromosome 15q21.1. This gene uses several different promoter sequences, transcriptional start sites, and alternatively chosen first exons to encode aromatase mRNA in different tissues under different hormonal regulation. P450aro is expressed in steroidogenic tissues (ovarian granulosa cells, placenta), in brain, and in nonsteroidogenic tissues, especially fat and bone (535). The *CYP19A1* gene for P450aro spans over 75 kb (537) and contains five different transcriptional start sites (538) with individual promoters that permit the tissue-specific regulation of its expression in diverse tissues. P450aro is a glycoprotein, but glycosylation *per se* does not appear to affect activity (539).

The oxidative demethylation of C<sub>19</sub> steroids, mainly androstenedione and testosterone, consumes three equivalents of molecular oxygen and NADPH, yielding formic acid and C<sub>18</sub>-steroids with an aromatic A-ring, hence the common name for this enzyme, aromatase. As is the case for P450scc, each successive oxygenation proceeds with greater efficiency, aiding in the completion of this transformation that is essential for estrogen biosynthesis in all animals (535). The mechanism of this aromatization appears to involve a hydroxylation at C2 of 19-oxo-androstenedione, followed by an enzyme-assisted rearrangement and tautomerization of the intermediate dienone to the phenolic A-ring (540), accounting for the incorporation of the final oxygen atom from molecular oxygen into the formic acid by-product. The crystallographic structure of human aromatase, the first of any human steroidogenic P450, reveals a tight active site well-suited to accommodate the androgens in the proper geometry (541). The hydrophobic amino terminus is in close apposition to the catalytic cleft, which suggests lipophilic substrates to gain access to the active site from the membrane using this membrane anchor.

Although it has traditionally been thought that aromatase activity is needed for embryonic and fetal development, infants and adults with aromatase deficiency have been described, showing that fetoplacental estrogen is not needed for normal fetal development (326, 542). Studies of patients with aromatase deficiency show that biologically significant estrogen synthesis derives entirely from P450aro (326, 327), although dietary phytoestrogens can provide some estrogen action in mice with targeted deletion of *Cyp19a1* (543). Although very few cases of aromatase deficiency have been described, these highly informative “knockouts of nature” illustrate principles of fetoplacental steroidogenesis. In fetuses homozygous for aromatase deficiency, the principal manifestation results

from its deficiency in the placenta (326) because ovarian steroidogenesis is quiescent during fetal life (106). The fetal adrenal makes large amounts of C<sub>19</sub> steroids, principally DHEAS, much of which is 16 $\alpha$ -hydroxylated by CYP3A7 in the fetal liver before undergoing metabolism via steroid sulfatases, 3 $\beta$ HSD1, aromatase, and 17 $\beta$ HSD1 in the placenta to produce estriol, the characteristic estrogen of pregnancy. Although huge amounts of estriol and estradiol are produced by the fetoplacental unit, estrogens are not needed for fetal development, the maintenance of pregnancy, or the onset of parturition; all of these processes proceed normally in fetuses lacking StAR, P450c17, or aromatase, or even in fetuses wholly lacking adrenal glands because of mutations in SF1 or DAX1 (329). However, in the absence of placental aromatase activity, androgenic C<sub>19</sub> steroids derived from the fetal adrenal are passed into the maternal circulation, causing marked virilization of the mother (326). Furthermore, in pregnancies in which the mother has poorly treated 21-hydroxylase deficiency, maternal testosterone values can exceed 300 ng/dl (a midpubertal value for males), yet the fetus is not virilized (544) because the maternal testosterone is efficiently metabolized to estradiol by placental aromatase. Thus, placental aromatase is a key enzyme in protecting the fetus and mother from unwanted androgen exposure.

Extraglandular aromatase expression, especially in fat, can convert androgens to estrogens. Aromatase in the epiphyses of growing bone converts testosterone to estradiol; the tall stature, delayed epiphyseal maturation, and osteopenia of males with aromatase deficiency, and their rapid reversal with estrogen replacement provide powerful evidence that estrogen, not androgen, is responsible for epiphyseal maturation in males (327). After birth, individuals with aromatase deficiency grow normally and continue linear growth after completion of puberty, with males producing normal amounts of testosterone. However, when treated with estrogens, aromatase-deficient subjects fuse their epiphyses and cease linear growth (545). These observations have led to the experimental use of aromatase inhibitors in various disorders of accelerated bone maturation.

### XIII. Isozymes of 5 $\alpha$ -Reductase

Studies in the 1960s showed that testosterone is converted to the more potent androgen, DHT, by an enzyme found in testosterone's target tissues (546). Studies using fibroblasts suggested that at least two human enzymes with different pH optima and genetics performed these transformations (547). Cloning studies identified two distinct forms of 5 $\alpha$ -reductase: the type 1 enzyme, found in the

scalp and other peripheral tissues, is encoded by the *SRD5A1* gene on chromosome 5p15 (548); whereas the type 2 enzyme, the predominant form found in male reproductive tissues, is encoded by the structurally related *SRD5A2* gene on chromosome 2p23 (549, 550). The two isoforms are very hydrophobic 30-kDa microsomal proteins that share 50% identity. The syndrome of 5 $\alpha$ -reductase deficiency, a disorder of male sexual differentiation, is due to a wide variety of mutations in the *SRD5A2* gene encoding the type 2 enzyme (551, 552). These genes have an unusual pattern of developmental regulation of expression. *SRD5A1* is not expressed in the fetus, which explains why fetal deficiency of the type 2 enzyme is not compensated for by the type 1 enzyme (550). *SRD5A1* is expressed briefly in the skin of the newborn, then remains unexpressed until its activity and protein are again found in the nongenital skin and liver after puberty. The type 1 enzyme accounts for most hepatic 5 $\alpha$ -reduction. *SRD5A2* is expressed in fetal genital skin, in the normal prostate, and in prostatic hyperplasia and adenocarcinoma. Thus, the type 1 enzyme may be responsible for the pubertal virilization seen in patients with classic 5 $\alpha$ -reductase deficiency, and the type 2 enzyme may be involved in male pattern baldness (550).

The 5 $\alpha$ -reductases are important beyond the context of male genital differentiation and androgen action because both isozymes reduce a variety of steroids in degradative pathways. Progesterone, 17OHP, and related C<sub>21</sub> steroids are excellent substrates for both 5 $\alpha$ -reductases, particularly the type 1; cortisol, cortisone, corticosterone, and related compounds are also good substrates (553). Such 5 $\alpha$ - (and 5 $\beta$ -) reduced steroids may be metabolized further and conjugated for excretion in the urine. Inhibitors of the type 2 enzyme have been developed for the treatment of prostatic hyperplasia and the prevention of its recurrence after surgery (554): finasteride selectively inhibits human 5 $\alpha$ -reductase type 2, whereas dutasteride inhibits both isoenzymes. These drugs are approved for treatment of prostatic hyperplasia in the United States.

Although the essential function of 5 $\alpha$ -reductase type 2 in male sexual differentiation is firmly established, the role of the type 1 isoform is less clear. The abundant expression of the type 1 isoform in liver and its high activity with C<sub>21</sub> steroids imply a role of degrading circulating C<sub>21</sub> steroids in preparation for excretion in the urine. However, disruption of the corresponding mouse *srd5a1* gene results in delayed parturition, which can be rescued with 5 $\alpha$ -androsterone-3 $\alpha$ ,17 $\beta$ -diol (555). In immature mice, 5 $\alpha$ -reductase type 1 is expressed both in the ovary and in the Leydig cells, where it participates in the synthesis of testicular 5 $\alpha$ -androstanediol via two pathways (556). Accumulating evidence suggests that 5 $\alpha$ -reductases are at least sometimes expressed in human adrenal (334) and possibly gonads,

but their function(s) in normal physiology or in pathological states is not known.

#### XIV. Isozymes of 3 $\alpha$ -Hydroxysteroid Dehydrogenase

The four major human 3 $\alpha$ HSDs are AKR enzymes that belong to the AKR1C family and are (usually) catalytically reductive (reviewed in Ref. 50). The 3 $\alpha$ HSD types 1, 2, 3, and 4 are trivial names for AKR1C4, 1C3, 1C2, and 1C1, respectively, which are encoded by tandemly duplicated genes on chromosome 10p14-p15. The unfortunate discordance between the numbering of the names for the proteins and genes can cause substantial confusion. Each enzyme has a characteristic tissue distribution (557, 558) and repertoire of catalytic activities (538). AKR1C3, also known as 17 $\beta$ HSD5 (discussed in Section XI.E), catalyzes the 17 $\beta$ HSD reaction with androstenedione, and all of these AKR1C isoforms catalyze additional reactions, such as the 20 $\alpha$ -reduction of pregnanes. In the brain, 3 $\alpha$ HSDs reduce 5 $\alpha$ -dihydroprogesterone to tetrahydroprogesterone (allopregnanolone), which is an allosteric activator of the  $\gamma$ -amino butyric acid (GABA<sub>A</sub>) receptor-chloride channel complex with a nanomolar affinity (559). AKR1C4 is abundant in liver but has been found in adrenal and gonads; AKR1C2 is found in the prostate (560); and AKR1C1 is abundant in the uterus. The amino acid compositions of isozymes of the type 2 and 3 enzymes differ by a few residues due to allelic variation; these minor differences account for the differing but partially overlapping array of compounds that may be used as substrates (Table 5).

The 3 $\alpha$ HSDs appear to be important in the CNS. Selective serotonin reuptake inhibitors, such as the common antidepressants fluoxetine and paroxetine, directly lower the K<sub>m</sub> of rat brain 3 $\alpha$ HSD type 2 for 5 $\alpha$ -dihydroprogesterone by almost 10-fold (561), explaining why these drugs augment brain allopregnanolone concentrations and perhaps contributing to their antidepressant activity. X-ray crystallography shows that the  $\beta$ -subunit of the mammalian voltage-gated potassium channel is a tetrameric structure (562) in which each subunit closely resembles a rat liver 3 $\alpha$ HSD (AKR1C9) (563), and even contains bound NADP<sup>+</sup>. These studies suggest a role for HSDs in coupling intracellular redox state to membrane excitation.

The 3 $\alpha$ HSDs differ from the 11 $\beta$ HSDs, 3 $\beta$ HSDs, and 17 $\beta$ HSD types 1 to 4 in several respects because all reductive 3 $\alpha$ HSDs are AKR enzymes rather than SDR enzymes. As AKR enzymes, they function as monomers with a TIM-barrel structure, binding cofactor with the nicotinamide ring draped across the mouth of the “barrel” rather



**TABLE 5.** Principal human 3 $\alpha$ -hydroxysteroid dehydrogenases

| Enzyme                       | 3 $\alpha$ HSD1                           | 3 $\alpha$ HSD2                                | 3 $\alpha$ HSD3                      | 3 $\alpha$ HSD4                            | RODH           |
|------------------------------|-------------------------------------------|------------------------------------------------|--------------------------------------|--------------------------------------------|----------------|
| Directional preference       | Reductive                                 | Reductive                                      | Reductive                            | Reductive                                  | Oxidative      |
| Gene                         | <i>AKR1C4</i>                             | <i>AKR1C3</i>                                  | <i>AKR1C2</i>                        | <i>AKR1C1</i>                              | <i>HSD17B6</i> |
| Cofactors                    | NADP(H)                                   | NADP(H)                                        | NADP(H)                              | NADP(H)                                    | NAD(H)         |
| Major reactions              |                                           |                                                |                                      |                                            |                |
| Reduction                    |                                           |                                                |                                      |                                            |                |
| 3 $\alpha$ HSD <sup>a</sup>  | High                                      | Moderate                                       | Moderate-high                        | Moderate                                   | Moderate       |
| 3 $\beta$ HSD <sup>b</sup>   | Nil                                       | Nil                                            | Nil                                  | Nil                                        | Moderate       |
| 17 $\beta$ HSD <sup>c</sup>  | Nil                                       | Moderate-high                                  | Nil                                  | Low                                        | Low            |
| 20 $\alpha$ HSD <sup>d</sup> | Low                                       | Low                                            | Low                                  | Moderate-high                              | Nil            |
| Other substrates             |                                           | DOC, PGF2 $\alpha$                             |                                      |                                            |                |
| Oxidation                    |                                           |                                                |                                      |                                            |                |
| 3 $\alpha$ HSD <sup>a</sup>  | Low                                       | Nil                                            | Low                                  | Low                                        | High           |
| 3 $\beta$ HSD <sup>b</sup>   | Nil                                       | Nil                                            | Nil                                  | Nil                                        | High           |
| 17 $\beta$ HSD <sup>c</sup>  | Nil                                       | Low                                            | Nil                                  | Nil                                        | Moderate       |
| 20 $\alpha$ HSD <sup>d</sup> | Nil                                       | Nil                                            | Nil                                  | Low                                        | Nil            |
| Tissue distribution          | Liver (major site), adrenal/gonad (trace) | Prostate, breast, liver, adrenal, testis, lung | Liver, prostate, lung, uterus, brain | Liver, testis, lung, breast, uterus, brain | Prostate       |

<sup>a</sup> Reductive reactions include: DHT  $\rightarrow$  5 $\alpha$ -androstane-3 $\alpha$ ,17 $\beta$ -diol, 5 $\alpha$ -androstane-3,20-dione  $\rightarrow$  androsterone, and 5 $\alpha$ -pregnane-3,20-dione  $\rightarrow$  allopregnanolone; oxidative reactions include the reverse reactions.

<sup>b</sup> Reductive reactions include: DHT  $\rightarrow$  5 $\alpha$ -androstane-3 $\beta$ ,17 $\beta$ -diol, 5 $\alpha$ -androstane-3,20-dione  $\rightarrow$  3 $\beta$ -androsterone, and 5 $\alpha$ -pregnane-3,20-dione  $\rightarrow$  5 $\alpha$ -pregnan-3 $\beta$ -ol-20-one (3 $\beta$ -allopregnanolone); oxidative reactions include the reverse reactions.

<sup>c</sup> Reductive reactions include: androsterone  $\rightarrow$  5 $\alpha$ -androstane-3 $\alpha$ ,17 $\beta$ -diol, androstenedione  $\rightarrow$  testosterone, estrone  $\rightarrow$  estradiol; oxidative reactions include the reverse reactions.

<sup>d</sup> Reductive reactions include: progesterone  $\rightarrow$  4-pregnen-20 $\alpha$ -ol-3-one (20 $\alpha$ -dihydroprogesterone) and DOC  $\rightarrow$  4-pregnene-20 $\alpha$ ,21-diol-3-one (20 $\alpha$ -dihydroDOC).

© R. J. Auchus and W. L. Miller.

than lying on a Rossman fold, and their kinetic mechanisms are highly ordered, with dissociation of the cofactor as the final and rate-limiting step (564). NADP(H) is bound tightly because of the interaction of Arg276 with the 2'-phosphate of NADP(H); mutation of Arg276 eliminates a conformational change associated with tight binding (565) and attenuates or reverses the preference for ketosteroid reduction in intact cells (52). The structure of AKR1C9 (564) shows that the active sites of the AKR enzymes also contain tyrosine and lysine residues that facilitate proton transfer during catalysis, but these residues are distantly located in linear sequence rather than confined to the Tyr-X-X-X-Lys motif as in SDR enzymes.

In contrast to the reductive 3 $\alpha$ HSDs, the oxidative 3 $\alpha$ HSDs belong to the SDR family and are similar to the retinol dehydrogenase or *cis*-retinol/androgen dehydrogenase (RODH/CRAD) subfamily (566). Although several of these RODH/CRAD enzymes have some 3 $\alpha$ HSD activity, the most active enzyme is RODH, the microsomal 3 $\alpha$ HSD, 3( $\alpha \rightarrow \beta$ )-hydroxysteroid epimerase (formally named 17 $\beta$ HSD6) whose cDNA was first cloned from prostate (533). This enzyme converts the inactive C<sub>19</sub> steroid 5 $\alpha$ -androstane-3 $\alpha$ ,17 $\beta$ -diol to DHT, and thus may catalyze the final step in the backdoor pathway from 17OHP to DHT (see Section XVIII.C). Prolonged incubation of 3 $\alpha$ -hydroxysteroids with cells expressing

17 $\beta$ HSD6 or with microsomes containing the recombinant enzyme yields both 3 $\alpha$ - and 3 $\beta$ -hydroxysteroids and 17 $\beta$ -hydroxysteroids (567); thus, this enzyme has many catalytic activities and may serve a variety of biological functions.

## XV. Isozymes of 11 $\beta$ -Hydroxysteroid Dehydrogenase

Although certain steroids are typically categorized as glucocorticoids or mineralocorticoids, cloning and expression of the "mineralocorticoid" (glucocorticoid type 2) receptor showed it had equal affinity for both aldosterone and cortisol (568). However, cortisol does not normally act as a mineralocorticoid *in vivo*, although cortisol concentrations typically exceed aldosterone concentrations by 100- to 1000-fold. In mineralocorticoid-responsive tissues such as the kidney, cortisol is enzymatically converted to cortisone, a metabolically inactive steroid (569).

The interconversion of cortisol and cortisone is mediated by the two isozymes of 11 $\beta$ HSD, both of which have oxidase and reductase activity, depending on whether NADP<sup>+</sup> or NADPH is available as the cofactor (570). Both enzymes are hydrophobic, membrane-bound proteins that bind cortisol/cortisone and corticosterone/11-dehydrocorticosterone, but otherwise their properties

and physiological roles differ substantially (570) (Table 6). Interest in these enzymes extends far beyond their deficiency states because they play central roles in metabolism (571, 572).

The type 1 enzyme (11 $\beta$ HSD1) (573) is a dimer of 34-kDa subunits expressed mainly in glucocorticoid-responsive tissues such as the liver, testis, lung, fat, and proximal convoluted tubule (571). The type 1 enzyme catalyzes both the oxidation of cortisol to cortisone using NADP<sup>+</sup> as cofactor ( $K_m$  1–2  $\mu$ M) and the reduction of cortisone to cortisol using NADPH cofactor ( $K_m$  0.1–0.3  $\mu$ M), with cortisone reduction being the dominant reaction in transfected cells (574, 575); the reaction catalyzed depends on which cofactor is available, but the enzyme can only function with high (micromolar) concentrations of steroid (575, 576). Many synthetic glucocorticoids (*e.g.*, prednisone and cortisone) are 11-ketosteroids that must be reduced to their 11 $\beta$ -hydroxy derivatives to attain biological activity; these transformations are performed mainly in the liver by 11 $\beta$ HSD1. However, when recombinant 11 $\beta$ HSD1 is expressed *in vitro*, oxidation of cortisol with NADP<sup>+</sup> is more efficient, and cortisone reduction is only achieved if NADP<sup>+</sup> is removed by an enzymatic NADPH regeneration system (576, 577). Thus, the net flux of steroid driven by 11 $\beta$ HSD1 depends on the relative concentrations of available NADPH and NADP<sup>+</sup>, which usually favors reduction in cells, especially given the high  $K_m$  of the enzyme for cortisol (577). The discrepancy between the prominent oxidative preference *in vitro* and the reductive dominance *in vivo* derives from the localization of 11 $\beta$ HSD1 in the lumen of the endoplasmic reticulum (578). In the endoplasmic reticulum, the ratio of NADPH to NADP<sup>+</sup> is maintained by hexose-6-phosphate dehydrogenase (H6PDH), rather than by cytoplasmic NADP<sup>+</sup>-coupled dehydrogenases (*e.g.*, glucose-6-phosphate dehydrogenase) (579).

The 41-kDa type 2 enzyme (580) (11 $\beta$ HSD2) has only 21% sequence identity with 11 $\beta$ HSD1, whereas 11 $\beta$ HSD2 and 17 $\beta$ HSD2 share 37% identity and favor steroid oxidation *in vivo*. Thus, 11 $\beta$ HSD1 and -2 are only distantly related members of the SDR family, yet they perform physiologically related but opposite functions.

11 $\beta$ HSD2 catalyzes only the oxidation of cortisol to cortisone using NAD<sup>+</sup> and functions with low (nanomolar) concentrations of steroid ( $K_m$  10–100 nM) (581, 582); whether or not 11 $\beta$ HSD2 catalyzes reductive reactions remains undemonstrated. 11 $\beta$ HSD2 is expressed in mineralocorticoid-responsive tissues and thus serves to “defend” the mineralocorticoid receptor by inactivating cortisol to cortisone, so that only “true” mineralocorticoids, such as aldosterone or DOC can exert a mineralocorticoid effect. 11 $\beta$ HSD2 is inactive against aldosterone, DOC, and 9 $\alpha$ -fludrocortisol. Thus, 11 $\beta$ HSD2 prevents cortisol from overwhelming renal mineralocorticoid receptors (569), and in the placenta and other fetal tissues 11 $\beta$ HSD2 (583, 584) also inactivates cortisol. The placenta also has abundant NADP<sup>+</sup> favoring the oxidative action of 11 $\beta$ HSD1, so that in placenta both enzymes protect the fetus from high maternal concentrations of cortisol (570). 11 $\beta$ HSD1 is located on the luminal side of the endoplasmic reticulum, and hence is not in contact with the cytoplasm. In this unusual cellular location, 11 $\beta$ HSD1 receives NADPH provided by the action of H6PDH (585), linking 11 $\beta$ HSD1 to the pentose monophosphate shunt, thus providing a direct paracrine link between local glucocorticoid production and energy storage as fat (586).

Cortisone and prednisone are inactive prohormones that must be reduced to cortisol or prednisolone by hepatic 11 $\beta$ HSD1 to bind to and activate the glucocorticoid receptor (GR) (45, 587). Cortisol is a potent agonist at the mineralocorticoid receptor in the distal nephron, but its oxidized 11-keto derivative, cortisone, is not a mineralocorticoid. Cortisol does not act as a mineralocorticoid *in vivo*, although cortisol concentrations can exceed aldosterone concentrations by three orders of magnitude because it is enzymatically converted to cortisone in the cells lining the cortical and medullary collecting ducts. Thus, the type 2 enzyme inactivates the mineralocorticoid activity of cortisol in the kidney tubule (569), and inactivating mutations in the type 2 enzyme cause a syndrome of apparent mineralocorticoid excess (AME) (588). The presence of the type 2 enzyme in the placenta (583) also inactivates endogenous and synthetic corticosteroids such as

TABLE 6. Principal characteristics of the two isozymes of 11 $\beta$ HSD

| 11 $\beta$ HSD type 1 |                                              | 11 $\beta$ HSD type 2                   |                                        |
|-----------------------|----------------------------------------------|-----------------------------------------|----------------------------------------|
| Tissues               | Liver, testis, lung, fat, proximal nephron   | Distal nephron, placenta, colon         |                                        |
| Location              | Endoplasmic reticulum, facing lumen          | Endoplasmic reticulum, facing cytoplasm |                                        |
| Reaction              | Reduction                                    | Reduction                               | Oxidation                              |
| Substrates            | Cortisone, dehydrocorticosterone, prednisone | (No significant substrates)             | Cortisol, corticosterone, prednisolone |
| Cofactor              | NADPH                                        | NAD <sup>+</sup>                        |                                        |
| Coenzyme              | H6PDH                                        |                                         |                                        |
| Steroid $K_m$         | 0.1–0.3 $\mu$ M                              | 0.01–0.1 $\mu$ M                        |                                        |

prednisolone, allowing the use of these agents during pregnancy without affecting the fetus. By contrast, 9-fluorinated steroids such as dexamethasone are minimally inactivated by the type 2 enzyme, primarily because of a shift in the oxidation/reduction preference rather than a reduction in affinity for the enzyme (589). It is this resistance to inactivation by placental 11 $\beta$ HSD2 that is essential for synthetic glucocorticoids to “cross the placenta” and to exert a pharmacological effect on the fetus. Furthermore, the relatively high placental concentrations of NADP<sup>+</sup> may also favor the oxidative action of 11 $\beta$ HSD1, so that both placental enzymes protect the fetus from the high maternal concentrations of cortisol that occur during pregnancy (570).

#### **A. Lesions in 11 $\beta$ HSD1—apparent cortisone reductase deficiency**

Apparent cortisone reductase deficiency is characterized by high ratios of cortisone to cortisol and of their respective metabolites in blood and urine (589). Such defects in 11 $\beta$ HSD activity impair cortisol feedback at the hypothalamic/pituitary axis, increasing the secretion of ACTH and consequently increasing adrenal C<sub>19</sub> steroid secretion, resulting in hyperandrogenism, sexual precocity, and polycystic ovaries (587). Only about 10 such patients have been described (587). This disorder is caused by inactivating mutations in H6PDH (590), which impair NADPH regeneration within the endoplasmic reticulum, rather than by mutations in the coding regions of HSD11B1. It was initially reported that mutations in both 11 $\beta$ HSD1 and H6PDH interacted to cause this disease (590), but variations in 11 $\beta$ HSD1 appear to make a relatively minor contribution to this phenotype or to the polycystic ovary syndrome (591–593). Mutations of H6PDH in patients (594) or knockout of the H6PDH gene in mice (595) appear to be both necessary and sufficient to cause this disorder. Both HSD11B1 and H6PDH deficiencies should be diagnosed from urinary steroids, which show a marked reduction in ratio of metabolites of cortisol to those of cortisone. The genetics and pathophysiology of cortisone reductase deficiency provide an excellent example of the critical role of nicotinamide cofactors in HSD function and biology.

#### **B. Lesions in 11 $\beta$ HSD2—apparent mineralocorticoid excess**

Patients with AME have hypervolemic hypertension, salt retention, and hypokalemic alkalosis—the classic picture of hyperaldosteronism—but with suppressed plasma renin activity and without measurable serum mineralocorticoids due to recessive mutations of 11 $\beta$ HSD2 (570). About 30 different mutations in 11 $\beta$ HSD2 have been described in about 60 patients with

AME (596, 597). Heterozygous carriers may have an increased risk of hypertension (598). Typical features of children with AME include failure to thrive, delayed puberty, polydipsia, polyuria, muscle weakness, and hypertension. The hypertension is severe, often causing end-organ damage at an early age. Diagnosis is made from the high ratio of urinary metabolites of cortisol to cortisone. Treatment with spironolactone, correction of the hypokalemia, low-salt diets, and diuretics is only partially successful, and 10% of patients die from cerebrovascular accidents (599).

### **XVI. Steroid Sulfatase and Sulfotransferases**

Steroid sulfates may be synthesized directly from cholesterol sulfate or may be formed by sulfation of steroids by cytosolic sulfotransferase (SULT) enzymes (600, 601). At least 44 distinct isoforms of these enzymes have been identified belonging to five families of SULT genes; many of these genes yield alternately spliced products accounting for the large number of enzymes. The SULT enzymes that sulfonate steroids include SULT1E1 (estrogens), SULT2A1 (nonaromatic steroids), and SULT2B1 (sterols). SULT2A1 is the principal SULT expressed in the adrenal, where it sulfates the 3 $\beta$ -hydroxyl group of  $\Delta^5$  steroids (pregnenolone, 17-hydroxypregnenolone, DHEA, and androsta-5-ene-3 $\beta$ ,17 $\beta$ -diol), but not of cholesterol. SULT2B1a will also sulfonate pregnenolone but not cholesterol, whereas cholesterol is the principal substrate for SULT2B1b in the skin, liver, and elsewhere. It is not clear whether most steroid sulfates are simply inactivated forms of steroid or whether they serve specific hormonal roles. Knockout of the mouse SULT1E1 gene is associated with elevated estrogen levels, increased expression of tissue factor in the placenta, and increased platelet activation, leading to placental thrombi and fetal loss that could be ameliorated by anticoagulant therapy (602). Mutations ablating the function of human SULT enzymes have not been described, but single nucleotide polymorphisms that alter the amino acid sequences and catalytic activity affecting drug activity are well-described. African-Americans have a high rate of polymorphisms in SULT2A1 apparently influencing plasma ratios of DHEA:DHEAS, which may correlate with the risk of prostatic and other cancers (603).

Steroid sulfates may also be hydrolyzed to the native steroid by steroid sulfatase. Deletions in the steroid sulfatase gene on chromosome Xp22.3 cause X-linked ichthyosis (604, 605). In the fetal adrenal and placenta, diminished or absent sulfatase deficiency reduces the pool of free DHEA available for placental conversion to estrogen, resulting in low concentrations of estriol in the maternal blood and urine. The accumulation of steroid sulfates in



the stratum corneum of the skin causes the ichthyosis. Steroid sulfatase is also expressed in the fetal rodent brain, possibly converting peripheral DHEAS to active DHEA (606, 607).

The obligatory sulfate donor for all the SULT enzymes is 3'-phosphoadenosine-5'-phosphosulfate (PAPS). PAPS is synthesized from ATP by two enzymatic activities: ATP sulfurylase, which catalyzes the conversion of ATP and sulfate ( $\text{SO}_4$ ) to adenosine phosphosulfate (APS); and APS kinase, which uses a phosphate from another ATP molecule to convert APS to PAPS (608). In human beings, the two activities are embodied in one enzyme with two isoforms, PAPS synthase types 1 and 2 (PAPSS1, PAPSS2). PAPSS1 is ubiquitously expressed, whereas PAPSS2 is highly expressed in the major sites of DHEA sulfation: the adrenal and liver (608). Deficiency of PAPSS2 prevents DHEA sulfation and causes the adrenal glands to produce much more free DHEA than normal. Because DHEA, unlike DHEAS, is a substrate for the  $3\beta$ HSD enzymes, the excess DHEA that accumulates when it cannot be converted to DHEAS yields excess androgens. The first patient shown to have compound heterozygous PAPSS2 deficiency was a 6-yr-old girl who presented with premature pubarche and advanced bone age, followed by worsening androgen excess with acne, hirsutism, and secondary amenorrhea at age 13 (609). Her circulating DHEA was markedly elevated, but DHEAS was very low, and androgens including androstenedione, testosterone, and DHT were significantly increased. PAPSS2 is probably also important for cartilage and bone formation because this patient had short stature and abnormal bone development. Furthermore, complete deficiency of PAPSS2 causes spondyloepimetaphyseal dysplasia of the Pakistani type, but steroid metabolism was not assessed in this kindred, and women could not be studied at all (610).

## **XVII. Other Genetic Adrenal Disorders Associated with Steroidogenesis**

### **A. Adrenal hypoplasia congenita**

Adrenal hypoplasia congenita (AHC), also known as congenital adrenal hypoplasia, is a disorder of adrenal development resulting in primary adrenal insufficiency. This condition can occur with several different inheritance patterns and with a variety of associated or syndromic features.

X-linked AHC, caused by mutations of the DAX1 (*NR0B1*) gene on chromosome Xp21, is the most prevalent form of primary adrenal hypoplasia (611, 612). In AHC, the definitive zone of the fetal adrenal does not develop, and the fetal zone is vacuolated and cytomegalic. About half of boys with AHC present with salt loss and

glucocorticoid insufficiency in early infancy; the rest present more insidiously with chronic adrenal insufficiency throughout childhood (613). DAX1 is a nuclear transcription factor involved in adrenal and testicular development, as well as being expressed in the pituitary gonadotropes. About two thirds of boys with AHC have DAX1 point mutations; the other one third have DAX1 gene deletions either in isolation or as part of a contiguous gene deletion syndrome involving a telomeric X-linked mental retardation locus (*IL1RAPL1*) and/or centromeric loci for glycerol kinase deficiency and sometimes ornithine transcarbamylase and Duchenne muscular dystrophy (612, 613). An adult-onset form of AHC due to point mutations in DAX1 has also been described in several patients (614). Female carriers of DAX1 mutations are unaffected, but half of their sons will be affected. A family history of adrenal failure, unexplained death, or pubertal abnormalities in the male relatives of a boy with adrenal insufficiency should suggest AHC.

Autosomal forms of adrenal hypoplasia exist, but their underlying basis is poorly understood. Heterozygous or homozygous mutations in SF1 (*NR5A1*) have been reported in 46,XY phenotypic females with either spontaneous or recessively inherited primary adrenal failure, and a heterozygous SF1 mutation has been described in a 46,XX girl with adrenal dysfunction (615–617). However, SF1 mutations have not been found in phenotypic males with adrenal hypoplasia or adrenal steroidogenic defects (613). Primary adrenal failure has been associated with Pena-Shokeir syndrome type I, pseudotrisomy 13, Meckel syndrome, and Pallister-Hall syndrome (*GLI3*), and with defects in *WNT3* (618). Primary adrenal hypoplasia also appears to be part of the IMAGE syndrome (Intrauterine growth retardation, Metaphyseal dysplasia, Adrenal hypoplasia, Genitourinary anomalies), but the underlying etiology of this condition remains unknown (619, 620).

### **B. ACTH resistance syndromes**

Hereditary unresponsiveness to ACTH [familial glucocorticoid deficiency (FGD)] can present as an acute adrenal crisis or with the signs and symptoms of chronic adrenal insufficiency in childhood. Several autosomal recessive causes of FGD have been identified (119). Patients with ACTH unresponsiveness typically continue to produce mineralocorticoids. The typical presenting picture consists of failure to thrive, lethargy, pallor, hyperpigmentation, and hypoglycemia, often associated with seizures. Rare cases may also entail electrolyte abnormalities or increased plasma renin activity, leading to misdiagnosis as a different form of adrenal insufficiency (621).

FGD1 is caused by autosomal recessive mutations in the gene for the G protein-coupled ACTH receptor (*MC2R*) (119, 622, 623). More than 20 MC2R mutations

have been reported, but the mutation S74I is especially prevalent. ACTH levels can be markedly elevated with consequent hyperpigmentation. Tall stature and increased head circumference have been reported in several cases (623, 624). Treatment with replacement doses of glucocorticoids typically prevents adrenal crises but may not suppress elevated ACTH levels completely (119).

FGD2, which is clinically indistinguishable from FGD1, is caused by mutations in the gene for melanocortin 2 receptor accessory protein (*MRAP*) (119, 625, 626). *MRAP* is expressed in multiple tissues where it seems to play a role in trafficking the ACTH receptor from the endoplasmic reticulum to the cell membrane. Additional genetic loci for other forms of FGD are under investigation. Some patients with nonclassical lipid CAH having mild disorders in *StAR* have been clinically mistaken for having FGD (117).

Triple A (Allgrove) syndrome consists of: 1) ACTH-resistant adrenal (glucocorticoid) deficiency (80% of individuals); 2) achalasia of the cardia (85%); and 3) alacrima (90%) (627). Mineralocorticoid insufficiency is reported in about 15% of cases, and many patients have progressive neurological symptoms such as intellectual impairment, sensorineural deafness, peripheral and cranial neuropathies, optic atrophy, Parkinsonism, and autonomic dysfunction (622, 628, 629). Triple A syndrome is caused by autosomal recessive mutations in *AAAS*, which encodes a WD-repeat protein termed *ALADIN* (630, 631). This protein localizes to the cytoplasmic side of the nuclear pore, where it plays a role in nuclear import (632). Defective nuclear import of the heavy chain of ferritin causes oxidative damage, apparently accounting for the pleiotropic effects of *ALADIN* deficiency (633). Clinical findings can be quite variable, even within the same family, but adrenal insufficiency is rarely the presenting feature.

### C. Familial glucocorticoid resistance

Familial glucocorticoid resistance is caused by mutations in the  $\alpha$ -isoform of the GR. Decreased glucocorticoid action results in grossly increased ACTH secretion, stimulating the production of cortisol and other adrenal steroids. These very rare patients may have fatigue, hypertension, and hypokalemic alkalosis, suggesting a mineralocorticoid excess syndrome, but they may also have hyperandrogenism (634). Patients may be homozygous for missense mutations (635) or heterozygous for a gene deletion (636), so that in each case some GR activity remains. No patients have been described with homozygous deletion of this receptor. However, a recent report described a newborn infant with profound glucocorticoid resistance who was homozygous for a frameshift mutation at codon 772 in the glucocorticoid-binding domain; the

infant had severe hypoglycemia and hypertension but had normal pulmonary development, suggesting that glucocorticoid action is not required for normal human fetal development (637). Heterozygous point mutations with incomplete dominant negative activity or multiple effects on GR $\alpha$  action have also been described (638). These point mutations may interfere with GR $\alpha$ -dependent transcriptional regulation through altered DNA binding, impaired ligand binding, delayed nuclear localization, abnormal nuclear aggregation, and disrupted interaction with coactivators, depending on the position of the mutation (634). GR-knockout mice have disordered hepatic gluconeogenesis and absent adrenomedullary chromaffin cells and die from neonatal respiratory distress syndrome (639). Thus, familial glucocorticoid resistance is typically a syndrome of only partial resistance to the action of glucocorticoids.

### D. Pseudohypoaldosteronism

Pseudohypoaldosteronism (PHA) is a rare salt-wasting disorder of infancy characterized by hyponatremia, hyperkalemia, and increased plasma renin activity in the face of elevated aldosterone concentrations. The more common autosomal recessive form of PHA (pseudohypoaldosteronism type II) is caused by inactivating mutations in any of the three subunits ( $\alpha$ ,  $\beta$ , and  $\gamma$ ) of the amiloride-sensitive epithelial sodium channel (ENaC) (640). PHAII is often associated with lower respiratory tract disease because ENaC mutations increase the volume of pulmonary fluid (641). This disease persists into adulthood, requiring vigorous salt-replacement therapy throughout life. Gain-of-function mutations due to carboxy-terminal truncation of  $\beta$ -ENaC cause Liddle's syndrome, an autosomal dominant form of salt-retaining hypertension (640).

Autosomal dominant type 1 pseudohypoaldosteronism (PHA I) is caused by inactivating mutations in the mineralocorticoid receptor (642, 643). PHAI is milder than PHAII caused by ENaC mutations and remits with age, but it requires sodium replacement therapy in infancy and childhood. Rare point mutations altering the structure of the ligand-binding domain of the mineralocorticoid receptor may result in mild constitutive activation as well as permitting binding and activation of the receptor by progesterone, resulting in severe hypertension that begins in adolescence and worsens with pregnancy (644).

Genetic forms of PHA must be distinguished from the acquired, transient form of PHA often seen in infants with obstructive uropathy, especially shortly after surgical relief of the obstruction (645). That lesion is renal tubular (646), so that mineralocorticoid treatment is generally ineffective; salt replacement generally suffices while the renal lesion resolves.

## XVIII. Tissue-Specific Pathways of Steroidogenesis

### A. Adrenal pathways

Diagrams of steroidogenic pathways, such as that shown in Fig. 3, typically combine the pathways from multiple cell types to provide an overview of all steroidogenic processes; however, such diagrams are misleading because the pathways differ in each steroidogenic cell type. The three major pathways of steroidogenesis in the human adrenal are shown in Fig. 13. The adrenal zona glomerulosa is characterized by three distinct features: it expresses angiotensin II receptors, it expresses P450c11AS, and it fails to express P450c17. As a result, the zona glomerulosa produces aldosterone under regulation by the renin/angiotensin system. By contrast, the adrenal zona fasciculata does not express angiotensin II receptors or P450c11AS, but instead expresses MC2R (the ACTH receptor) and P450c11 $\beta$ , which cannot convert 18-hydroxycorticoste-

rone to aldosterone and has minimal capacity to convert corticosterone to 18-hydroxycorticosterone (458). Both the zona glomerulosa and zona fasciculata express P450c21, but the zona fasciculata also expresses P450c17, which allows cortisol synthesis. The zona fasciculata, however, expresses little (if any) cytochrome  $b_5$  (201); consequently, P450c17 in the zona fasciculata catalyzes 17 $\alpha$ -hydroxylation but very little 17,20-lyase activity. Thus, the zona fasciculata produces two glucocorticoids (cortisol and corticosterone) under the influence of ACTH, but very little DHEA. Patients with severe mutations in P450c17 cannot synthesize cortisol but instead increase corticosterone production (647) (as do rodent adrenals, which normally lack P450c17), explaining why they are not glucocorticoid-deficient, despite the lack of cortisol (Fig. 13). The adrenal zona reticularis also expresses MC2R, but very little P450c21 or P450c11 $\beta$ , and as a result, the zona reticularis produces minimal amounts

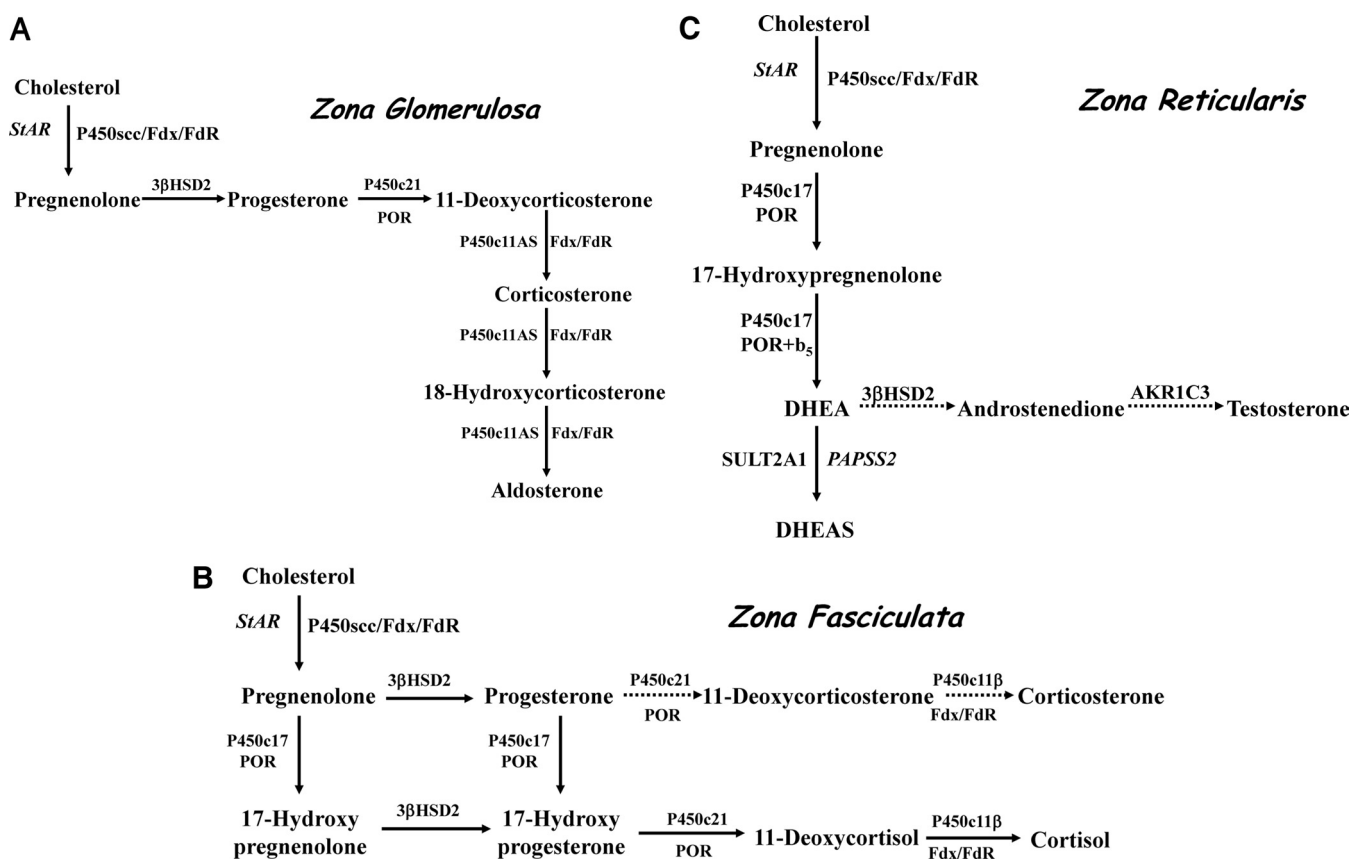

**FIG. 13.** Major steroidogenic pathways in the three zones of the human adrenal cortex. The conversion of cholesterol to pregnenolone by P450scc is common to all three zones. A, In the zona glomerulosa,  $3\beta\text{HSD2}$  converts pregnenolone to progesterone. P450c17 is absent, but P450c21 produces DOC, which is a substrate for P450c11AS. P450c11AS catalyzes 11-hydroxylation and two 18-oxygenations, which completes aldosterone synthesis. B, The zona fasciculata expresses P450c17, so pregnenolone is hydroxylated to 17 $\alpha$ -hydroxypregnenolone (or progesterone to 17-OHP), but the zona fasciculata contains little cytochrome  $b_5$ , minimizing the 17,20-lyase activity of P450c17, and little DHEA is produced. Instead,  $3\beta\text{HSD2}$  and P450c17 generate 17-OHP, the preferred substrate for P450c21, yielding 11-deoxycortisol. P450c11 $\beta$ , which is unique to the zona fasciculata, completes the synthesis of cortisol. Corticosterone is normally a minor product (dashed arrows) derived from a parallel pathway without the action of P450c17. C, The zona reticularis has large amounts of P450c17 and little  $3\beta\text{HSD2}$ , so that pregnenolone is sequentially oxidized to 17-hydroxypregnenolone and then DHEA. SULT2A1, using PAPS synthesized by PAPSS2 (see Section XVI), sulfates DHEA, and DHEAS is exported to the circulation. Testosterone synthesis is a very minor pathway (dashed arrows). [© R. J. Auchus.]



of cortisol. By contrast, the zona reticularis expresses large amounts of P450c17 and cytochrome  $b_5$  (201), maximizing 17,20-lyase activity (189), so that DHEA is produced, much of which is sulfated to DHEAS by SULT2A1 (648). The zona reticularis expresses relatively little 3 $\beta$ HSD2, and the  $K_m$  of 3 $\beta$ HSD2 is approximately 5  $\mu$ M for pregnenolone and 17-hydroxypregnenolone (188), whereas the  $K_m$  for both activities of P450c17 is approximately 1  $\mu$ M (189), so that abundant DHEA is produced. As DHEA accumulates, small amounts are converted to androstenedione, and very small amounts of this androstenedione are converted to testosterone, probably by AKR1C3/17 $\beta$ HSD5. Thus, the pattern of steroid products secreted by each adrenal zone is determined by the enzymes produced in that zone and may be logically deduced from an understanding of their specific enzymatic properties (648).

## B. Gonadal pathways

Testicular synthesis of testosterone follows a pathway that is similar to C<sub>19</sub>-steroid production in the adrenal zona reticularis, with the notable exceptions that the stimulus for steroidogenesis is transduced by the LH receptor rather than MC2R and that Leydig cells express abundant 3 $\beta$ HSD2 and 17 $\beta$ HSD3, but no SULT2A1. Thus, DHEA produced in the testis is not sulfated but is readily converted to androstenedione and then testosterone (Fig. 14). As in the adrenal, the principal pathway to C<sub>19</sub>-steroids is via  $\Delta^5$  steroids to DHEA; the  $\Delta^4$  pathway from

17OHP to androstenedione makes a minimal contribution (238, 282).

Ovarian steroidogenesis is more complex because the enzymatic steps are partitioned between the granulosa and theca cells, which surround the oocyte and form a follicle. Furthermore, the patterns of steroidogenesis vary during the cycle: estradiol is the principal product in the follicular phase, and progesterone is produced in the luteal phase (Fig. 14). The key point in ovarian steroidogenesis is that granulosa cells do not express P450c17 (158). Thus, in general, steroidogenesis is initiated in granulosa cells under the influence of LH, which, via cAMP, stimulates the expression of P450scc (158). Pregnenolone and progesterone from granulosa cells diffuse into adjacent theca cells, where they can be acted upon by P450c17 and 3 $\beta$ HSD2 to produce androstenedione. Small amounts of this androstenedione are secreted or converted to testosterone (probably by AKR1C3/17 $\beta$ HSD5), but most androstenedione returns to the granulosa cells where it is converted to estrone and then to estradiol by P450aro and 17 $\beta$ HSD1, respectively, under the influence of FSH. Thus, as with the three zones of the adrenal, the patterns of gonadal steroidogenesis are dictated by the cell-specific expression of specific steroidogenic enzymes.

## C. The “backdoor pathway” to dihydrotestosterone

Studies of fetal androgen biosynthesis and mechanisms of virilization in the tammar wallaby have revealed the presence of a novel, alternative, so-called “backdoor pathway”

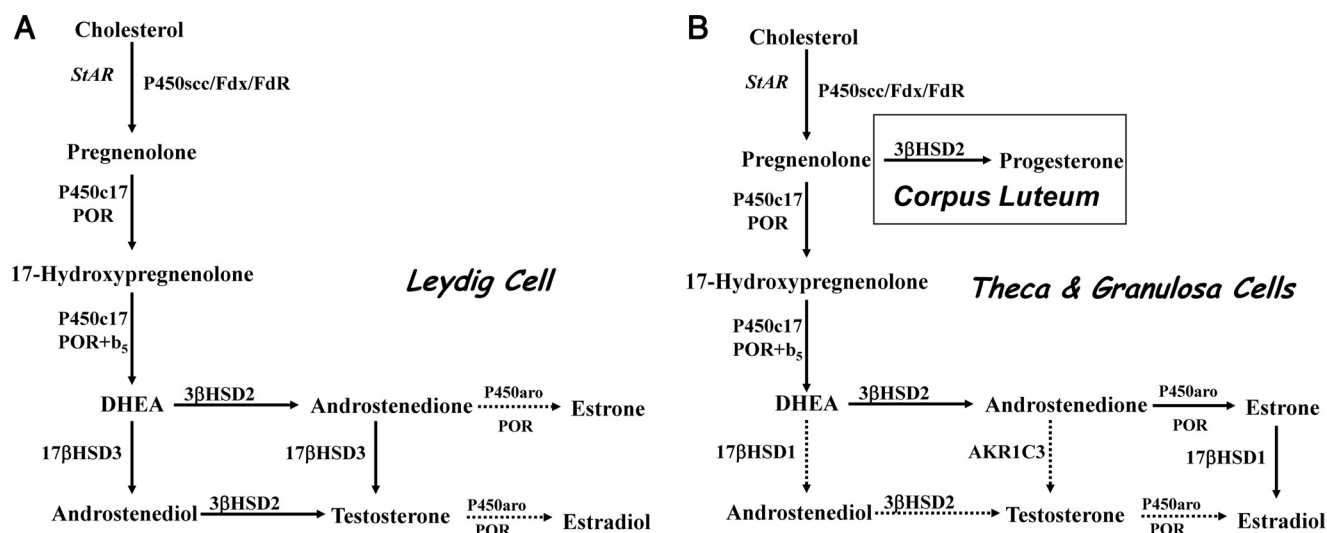

**FIG. 14.** Major pathways of gonadal steroidogenesis. A, In testicular Leydig cells, cholesterol is converted to DHEA by the same enzymes using the same cofactors as in the adrenal zona reticularis. Leydig cells contain abundant 17 $\beta$ HSD3, so that Leydig cells efficiently produce testosterone, via androstenedione and/or androstenediol. B, Ovarian granulosa cells contain P450scc and convert cholesterol to pregnenolone. The ovarian theca cells express low levels of P450scc but high amounts of P450c17 and hence acquire C<sub>21</sub>-steroids from the granulosa cells and produce C<sub>19</sub> precursors of sex steroids (the two-cell model of ovarian steroidogenesis). Theca cells do not express aromatase (P450aro); hence, androstenedione must return to the granulosa cells, which contain abundant aromatase and 17 $\beta$ HSD1, completing the synthesis of estradiol. In the luteal phase, 3 $\beta$ HSD2 in the corpus luteum metabolizes nascent pregnenolone to progesterone, the final product. Minor pathways are shown with dashed arrows. [© R. J. Auchus.]

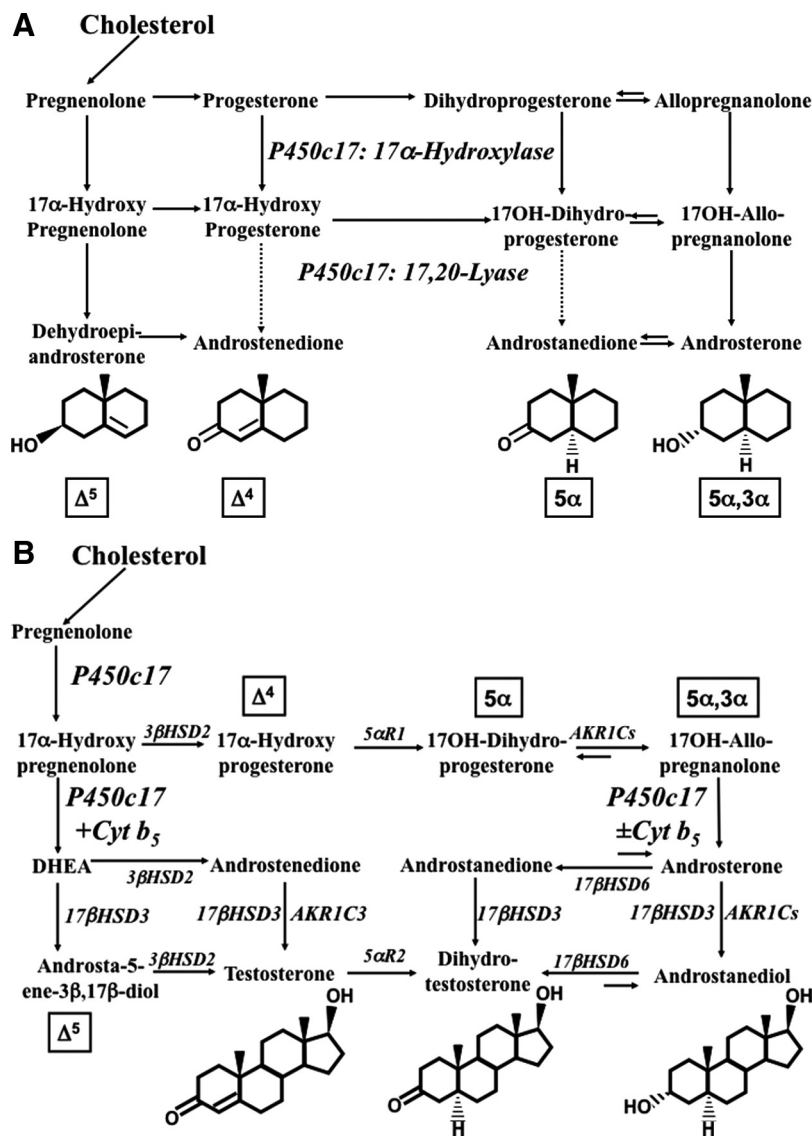

**FIG. 15.** Reactions catalyzed by human P450c17 and pathways to C<sub>19</sub> steroids. A, The four principal A/B-ring configurations of active endogenous steroids and their precursors: Δ<sup>5</sup>, Δ<sup>4</sup>, 5α, and 5α,3α (structures shown at bottom). Progesterone and 17α-hydroxyprogesterone can be 5α-reduced, and once the A-ring is saturated, these 5α-reduced steroids are substrates for reductive 3αHSDs of the AKR1C family. Human P450c17 17α-hydroxylates all four classes of C<sub>21</sub> steroids, but the 17,20-lyase activity is robust only with 17α-hydroxypregnenolone and 17-hydroxyallopregnanolone (5α-pregnane-3α,17α-diol-20-one), the Δ<sup>5</sup> and 5α,3α pathways, respectively. Dihydroprogesterone, 17-hydroxydihydroprogesterone, and allopregnanolone are trivial names for 5α-pregnane-3,20-dione, 5α-pregnan-17α-ol-3,20-dione, and 5α-pregnan-3α-ol-20-one, respectively. B, Two pathways to DHT using the different 17,20-lyase activities of human P450c17. In the conventional or Δ<sup>5</sup>-pathway (left), the 17,20-lyase activity of P450c17 requires cytochrome b<sub>5</sub> to efficiently convert 17α-hydroxypregnenolone to DHEA, and testosterone is reduced in target tissues by 5α-reductase 2 (5αR2) to DHT. In the “backdoor” or 5α,3α-pathway (right), 5α-reduction by 5αR1 and 3α-reduction of C<sub>21</sub> steroids occurs in the steroidogenic tissue before the 17,20-lyase reaction. In the best characterized pathway based on the tammar wallaby pouch young, 17-hydroxyallopregnanolone is cleaved to androsterone without requiring cytochrome b<sub>5</sub> and reduced to androstanediol. Androstanediol is exported from the testis and metabolized to DHT by the oxidative 3αHSD activity of 17βHSD6. DHT may also be formed from androsterone via a parallel pathway catalyzed by 17βHSD6 and 17βHSD3, with androstenedione as the intermediate. Note that testosterone is not an intermediate in the backdoor pathway to DHT, that different isoforms of 5α-reductase appear to be involved in the two pathways, and that both reductive and oxidative 3αHSD activities are required for the backdoor pathway. Structures of testosterone, DHT, and androstanediol are shown at bottom. [© R. J. Auchus.]

that leads from 17OHP to DHT without going through androstenedione or testosterone as intermediate steroids (332, 333). This pathway is initiated when either progesterone or 17OHP is 5α-reduced. The resulting 5α-reduced C<sub>21</sub> steroids, dihydroprogesterone (5α-pregnane-3,20-dione) and 5α-pregnan-17α-ol-3,20-dione, are readily acted on by reductive 3αHSDs to yield allopregnanolone [5α-pregnan-3α-ol-20-one (Allo)] and 17α-hydroxylated allopregnanolone (5α-pregnan-3α,17α-diol-20-one; 17OH-Allo). Dihydroprogesterone and Allo are excellent substrates for the 17α-hydroxylase activity of P450c17 (649), and 17OH-Allo is the most efficient substrate known for the 17,20-lyase activity of human P450c17. Furthermore, unlike the conversion of 17α-hydroxypregnenolone to DHEA (189, 232, 233), the cleavage of 17OH-Allo to androsterone is minimally dependent on cytochrome b<sub>5</sub> (649). The resulting androsterone may be 3α-oxidized to DHT by the activity of 17βHSD6 [RODH, the microsomal 3αHSD, 3(α→β)-hydroxysteroid epimerase] (533). Thus, this pathway is an alternative, backdoor pathway to DHT, by which DHT is produced without utilizing DHEA, androstenedione, and testosterone as intermediates (333) (Fig. 15). Consequently, the presence of 5α-reductases in steroidogenic cells does not preclude the production of C<sub>19</sub> steroids, but rather paradoxically enhances the production of DHT by directing flux to 5α-reduced precursors of DHT. The backdoor pathway enables production of C<sub>19</sub> steroids from 17OHP, despite the poor 17,20-lyase activity of human P450c17 for 17OHP, by using 17OH-Allo as the substrate for the 17,20-lyase reaction. The presence of 5α-reductase activity is a key requirement for the backdoor pathway.

Originally described in marsupials, the backdoor pathway is relevant to human steroidogenesis. The best-studied example of 5α-reduction in a human

steroidogenic tissue is the production of  $5\alpha$ -dihydroprogesterone in human corpus luteum by the type 1 enzyme (650). Human enzymes catalyze all of the other reactions required to complete this alternate route to DHT, and good evidence documents production of  $5\alpha$ -reduced androgens by the fetal adrenal, at least in some pathological states. Consequently, it appears that the backdoor pathway is a major route to DHT in pathological states in which 17OHP accumulates, including 21-hydroxylase deficiency and POR deficiency. Mass spectrometric analyses of urinary steroids in patients with POR deficiency confirm that all the steroidal intermediates in the backdoor pathway are produced in infants, children and adults with severe POR deficiency and pregnant women carrying a POR-deficient fetus (316, 331, 651), and adults with mild POR deficiency (283). Androgen production by the backdoor pathway may explain why newborn girls with 21- and 11-hydroxylase deficiencies can be severely virilized, whereas those with  $3\beta$ HSD2 deficiency, whose adrenals cannot make 17OHP, are minimally virilized (195). The fractional contributions of the conventional and backdoor pathways to DHT production during human sexual differentiation at 8 to 12 wk gestation, and the expression of  $5\alpha$ -reductase in the fetal adrenal and gonad tissues (652), however, are only beginning to be determined.

#### D. Neurosteroids: steroid synthesis in the brain

Although it has long been known that steroids act on the brain and some early studies found some steroidogenic activities in rat brain homogenates (653), it was not until the early 1980s that clear evidence was presented suggesting that the brain is a site of steroid biosynthesis. DHEA, DHEAS, pregnenolone, and pregnenolone sulfate were found in the brains of rats at higher concentrations than found in peripheral blood, and these concentrations persisted for weeks after adrenalectomy and gonadectomy, suggesting endogenous synthesis (654, 655). Residual skepticism that the brain was the actual site of steroidogenesis was dispelled by finding the mRNAs for P450scc, P450c11 $\beta$ , and ferredoxin in adult rat brain (Ref. 656; for review see Ref. 657). Steroids that are endogenously produced in the brain or elsewhere in the nervous system are termed “neurosteroids.” To date, most studies of neurosteroids have been done with rodents; at present, there is scant evidence for the biosynthesis of steroids in the human brain, although such synthesis seems likely. A wide variety of steroids and steroidogenic enzymes have been found in various regions of the rodent brain; there is no single center that is steroidogenic, so that steroids appear to be widely produced for local action (606, 658). Those actions appear to supplement and reinforce actions regulated by other factors, rather than serving indispensable

functions (for review, see Refs. 659 and 660). Thus, ablation of the mouse P450scc gene, similarly to the few cases of human P450scc deficiency, is compatible with anatomically normal development and term gestation, although the animals die shortly after birth from glucocorticoid and mineralocorticoid deficiency (135).

Two steroid pathways seem to predominate in the rodent brain. The first is the conventional pathway from cholesterol to DHEA and DHEAS, involving P450scc, P450c17, and a steroid SULT, whereas the second involves the synthesis of Allo, which is a  $3\alpha,5\alpha$ -reduced derivative of progesterone. Both pathways are initiated by P450scc; whether or not StAR also participates in this first step, or whether brain steroidogenesis, like that in the placenta, is independent of StAR, remains controversial. The mRNAs for StAR and P450scc are colocalized in several regions of the rat brain (661), and StAR mRNA is found in various regions of the human brain (662). StAR mRNA appears in the mouse brain at postnatal d 1 (663), but neither StAR knockout mice nor human patients with lipoid CAH have a phenotype attributable to altered CNS function. Similarly, the mRNA for P450scc is detectable in the fetal mouse brain (656) in specific regions (606), but neither P450scc knockout mice nor the rare patients with P450scc deficiency exhibit obvious neurological phenotypes. P450c17, the key enzyme in the production of DHEA, is found in embryonic mouse neurons as early as E9.5, and is found throughout the developing mouse brain (658), but in the adult it is found only in the hippocampus (664) and spinal cord (665). DHEA and DHEAS appear to exert actions on the genesis, protection, and survival of neurons. DHEA and DHEAS protect the hippocampus against the toxicities of glutamate, AMPA ( $\alpha$ -amino-3-hydroxy-5-methyl-4-isoxazole-propionate), and kainite (666). *In vitro*, concentrations of DHEA and DHEAS equivalent to those found in the fetal mouse brain stimulate neuronal development. When added to primary cultures of embryonic mouse neurons, low nanomolar concentrations of DHEA stimulate the outgrowth of neurites that become axons, whereas DHEAS stimulates the outgrowth of neurites that become dendrites (607). Treatment of rats with sc DHEA pellets increased neurogenesis in the dentate gyrus (667). DHEA and DHEAS exert their actions via non-genomic receptors, such as by antagonizing GABA<sub>A</sub> receptors (668) or as agonists for  $\sigma$  receptors (669). Evidence for relevance to human biology comes from effects of DHEA increasing neurogenesis and neuronal survival in cultured human neural stem cells (670). However, testing of the roles of DHEA and DHEAS in mice by knocking out the gene for P450c17 has been unsuccessful because this knockout, in contradistinction to human P450c17 deficiency, causes embryonic lethality (671).



The second pathway leads to progesterone and its  $3\alpha,5\alpha$ -reduced derivative, Allo; several bioactive steroids are produced along this pathway. After cholesterol is converted to pregnenolone by P450<sub>scc</sub>, pregnenolone may be sulfated. Although pregnenolone sulfate was one of the steroids first described in the rat brain (655), advanced mass spectrometric procedures have failed to confirm its presence (672, 673); nevertheless, both SULT2A1 and SULT2B1a mRNA and protein have been found in rat brain (674, 675). SULT2B1 appears to be expressed in the human fetal brain (676), and the presence of pregnenolone sulfate in human brain has been confirmed (677). Pregnenolone sulfate is a negative regulator of GABA<sub>A</sub>, kainite, and AMPA receptors, and a positive regulator of *N*-methyl-*D*-aspartate receptors, thus acting as an excitatory neurosteroid (reviewed in Ref. 660). Pregnenolone sulfate enhances memory in mice (678, 679) and rats (680), but the potential relevance of these observations to human biology remains unknown.

Pregnenolone may be converted to progesterone by  $3\beta$ HSD, which is found in rat glia and neurons (681, 682). Type 1  $3\beta$ HSD is found throughout the rat brain and peripheral nervous system (661, 683). Progesterone exerts behavioral effects, probably via its action as an anesthetic, which was one of the first observations of steroids acting on the CNS (684). Progesterone also affects myelination in the peripheral nervous system by directly stimulating myelin synthesis in Schwann cells and by stimulating neuronal gene expression via its classic nuclear receptor (685, 686). Emerging data indicate that progesterone exerts protective and recuperative effects in spinal cord injury, apparently via both cell surface and classic nuclear receptors (687), although it is possible that some of these effects are mediated by progesterone metabolites. Finally, progesterone appears to stimulate cerebellar development. Rodent Purkinje neurons contain the enzymes needed to produce progesterone and Allo and produce these steroids in the neonatal period during growth of the cerebellar cortex (683), and progesterone promotes dendritic growth and synaptic density in Purkinje cells in newborn rat cerebellar slices *in vitro* and *in vivo* (688).

Progesterone may then be sequentially  $5\alpha$ -reduced and  $3\alpha$ -reduced to Allo, a brain pathway that is similar to the backdoor pathway of testicular steroidogenesis. As in the backdoor pathway, the principal  $5\alpha$ -reductase is type 1 (550, 689–691), especially in the fetal rodent brain (692), although type 2 is transiently expressed toward the end of mouse gestation (693, 694). The identity of the  $3\alpha$ -reductase is somewhat unclear. Both a type 2 and type 3  $3\alpha$ HSD were cloned from both fetal and adult human brain, whereas type 3 predominated in the putamen, cerebellum, medulla, and spinal cord (695). The cloned type 2  $3\alpha$ HSD

differed from that cloned from prostate by amino acid differences at positions 38 and 89 (524) and differed from that cloned from human liver by differences at amino acids 38, 75, 89, and 175 (557). Whether these three putatively distinct forms of  $3\alpha$ HSD represent allelic variants or sequencing errors of human AKR1C3 cDNA remains undetermined. Allo acts at nanomolar concentrations as an anesthetic, anxiolytic anticonvulsant by binding to GABA<sub>A</sub> receptors at sites distinct from those bound by GABA, benzodiazepines, and barbiturates, functioning as an allosteric modulator to open the channel and increase chloride flux (696–699). Animal progesterone withdrawal experiments that are designed to model the human menstrual cycle suggest that neurosteroids modulate GABA<sub>A</sub> receptor subunit composition and function, which may be associated with changes in mood and behavior in some women during the late luteal phase when Allo levels drop (700). The synthesis of multiple neurosteroids is disordered in a mouse model of Niemann-Pick type C disease, a fatal lysosomal storage disease; administration of Allo to affected newborn mice delays onset of symptoms until after untreated littermates are dead, and doubles life expectancy (701).

The brain also 21-hydroxylates steroids (702), leading to the synthesis of DOC and its  $3\alpha,5\alpha$ -reduced product, tetrahydro-DOC, which acts similarly to Allo at GABA<sub>A</sub> receptors (703); however, the brain does not express significant amounts of P450<sub>c21</sub> (366). The enzymes responsible for brain 21-hydroxylase activity include CYP2D4 in the rat and CYP2D6 in the human brain (704); other CYP enzymes may also be involved. In addition, the brain contains P450<sub>c11 $\beta$</sub>  (656), so that all enzymes needed for the synthesis of corticosterone and cortisol are present, but it is not clear whether the brain is a site of glucocorticoid biosynthesis.

## XIX. Fetoplacental Steroidogenesis

### A. The fetal adrenal

Adrenocortical steroidogenesis begins around the seventh week of gestation. Steroidogenic enzymes are immunocytochemically detectable in the fetal zone at 50–52 d after conception, and by 8 wk the adrenal contains cortisol and responds to ACTH in primary culture systems (334). Fetal cortisol synthesis is regulated by pituitary ACTH and involves transient expression of adrenal  $3\beta$ HSD2. Following the ninth week after conception, expression of  $3\beta$ HSD2 and synthesis of cortisol wane;  $3\beta$ HSD2 is barely detectable at 10–11 wk and is absent at 14 wk (334). At the same time, the fetal adrenal also produces  $17\beta$ HSD5 (334), which can convert androstenedione to testosterone. Thus, the fetal adrenal makes cortisol at the same time

during gestation that fetal testicular testosterone is virilizing the genitalia of the normal male fetus. This fetal adrenal cortisol apparently suppresses ACTH, which otherwise would drive adrenal testosterone synthesis via 17 $\beta$ HSD5, thus preventing the virilization of female fetuses.

Fetuses with genetic lesions in adrenal steroidogenesis can produce enough adrenal androgen to virilize a female fetus to a nearly male appearance, and this masculinization of the genitalia is complete by the 12th week of gestation. The fetal adrenal is relatively deficient in 3 $\beta$ HSD2 activity after 12 wk (334, 705) but has robust 17,20-lyase activity of P450c17. Low 3 $\beta$ HSD and high 17,20-lyase activity account for the abundant production of DHEA and DHEAS by the fetal adrenal, which are converted to estrogens by the placenta. The fetal adrenal also has considerable SULT activity but little steroid sulfatase activity, also favoring conversion of DHEA to DHEAS. The resulting DHEAS cannot be a substrate for adrenal 3 $\beta$ HSD2; instead, it is secreted, 16 $\alpha$ -hydroxylated in the fetal liver by CYP3A7 (706–708), and then acted on by placental 3 $\beta$ HSD1, 17 $\beta$ HSD1, and P450aro to produce estriol. Small amounts of DHEA/DHEAS bypass the liver and are not 16 $\alpha$ -hydroxylated, and hence yield estrone and estradiol. Estrogens inhibit adrenal 3 $\beta$ HSD activity, providing a feedback system to promote production of DHEAS (709). Fetal adrenal steroids account for 50% of the estrone and estradiol and 90% of the estriol in the maternal circulation (710).

Although the fetoplacental unit produces huge amounts of DHEA, DHEAS, and estriol, as well as other steroids, they do not appear to serve an essential role. Successful pregnancy is wholly dependent on placental synthesis of progesterone, which suppresses uterine contractility and prevents spontaneous abortion (711); however, fetuses with genetic disorders of adrenal and gonadal steroidogenesis develop normally, reach term gestation, and undergo normal parturition and delivery. Mineralocorticoid production is only required postnatally, estrogens are not required, and androgens are only needed for male sexual differentiation (329). Human fetal glucocorticoids may be needed to suppress the virilization of female fetuses at about 8–12 wk (334), but it appears that glucocorticoids are not needed thereafter (329, 637, 712, 713).

The regulation of steroidogenesis and growth of the fetal adrenal are not fully understood, but both are related to ACTH. ACTH effectively stimulates steroidogenesis by fetal adrenal cells *in vitro* (54, 714), and excess ACTH is clearly involved in the adrenal growth and overproduction of androgens in fetuses affected with CAH. Prenatal treatment of such fetuses by administering pharmacological

doses of dexamethasone to the mother at 6 to 10 wk gestation can significantly reduce fetal adrenal androgen production and thus reduce the virilization of female fetuses; thus, the hypothalamic-pituitary-adrenal axis functions very early in fetal life (407). By contrast, however, anencephalic fetuses lacking pituitary ACTH have adrenals that contain a fairly normal complement of steroidogenic enzymes and retain their capacity for steroidogenesis. Thus, fetal adrenal steroidogenesis may be regulated by both ACTH-dependent and ACTH-independent mechanisms.

## B. Placental steroidogenesis

The placenta has two steroidogenic pathways. First, it can initiate steroidogenesis *de novo* from cholesterol and convert the resulting pregnenolone and progesterone; second, it can take C<sub>19</sub> steroids produced by the fetal adrenal and convert them to estrogens. In having these two pathways and lacking P450c17, placental steroidogenesis resembles that in ovarian granulosa cells, but many of the enzymes and their regulation differ.

Human placental synthesis of progesterone begins in midgestation, at the same time that the maternal corpus luteum of pregnancy involutes (the luteoplacental shift), so that progesterone is provided throughout pregnancy. Progesterone suppresses uterine contractility, and hence is essential for the maintenance of pregnancy; drugs that oppose the action of progesterone, such as mifepristone (RU-486), act as abortifacients. Syncytiotrophoblast cells of the placenta use the same P450scc enzyme to convert cholesterol to pregnenolone that is used in the adrenal and gonad (131), but the transcription of its gene is under unique control. Whereas transcription of the genes for P450scc and all other enzymes in the adrenal and gonad requires the action of SF1, little if any SF1 is expressed in the placenta (68, 142). Furthermore, analysis of the expression of P450scc in placental JEG-3 cells shows that promoter elements that bind factors other than SF1 are required for its transcription (68). Several such factors have now been identified, including the CP2 (*grainyhead*) factors LBP1b (also called TFCEP2A or UBP1) and LBP9 (TFCEP2L1) (142–145), and the zinc-finger protein TreP-132 (149, 150). In addition, the placenta, unlike the adrenal or gonad, fails to express the gene for StAR (69), and StAR mutations causing lipoid CAH do not disrupt placental steroidogenesis. Thus, the same ill-defined mechanisms of StAR-independent steroidogenesis that are exemplified by the two-hit physiology of lipoid CAH (Fig. 5) appear to be operative in the placenta. A strong candidate for a factor mediating StAR-independent movement of cholesterol into placental mitochondria is MLN64, a 445-amino acid protein first identified in studies of metastatic breast cancer (70). Although full-length MLN64 has minimal StAR-

like activity, the carboxy-terminal 234 amino acids of MLN64 are very similar to StAR and have about 50% of StAR's activity in transfected cells (71). N-218 MLN64 and StAR share very similar biophysical properties, and a truncated form of MLN64 that cross-reacts with StAR antisera and is of about the same size as N-234 or N-218 MLN64 is found in human placenta (72). To conclude the distinctly placental pathway from cholesterol to progesterone, the placenta utilizes  $3\beta$ HSD1 rather than the  $3\beta$ HSD2 expressed in the adrenal and gonad. The two isozymes of  $3\beta$ HSD have similar  $K_m$  and  $V_{max}$  values, so that the enzymological efficiency of this reaction is no different in the placenta.

A key feature of human placental steroidogenesis is that (unlike the rat) (715) it fails to express P450c17 (158). As a result, the placenta, like an ovarian granulosa cell, cannot convert pregnenolone to sex steroids. Instead, the placenta receives  $16\alpha$ -hydroxylated DHEA and DHEAS from the fetal circulation and, through the actions of steroid sulfatase,  $3\beta$ HSD1,  $17\beta$ HSD1, and aromatase, produces large amounts of estriol. Such placental estrogens provide a useful index of placental welfare, but serve no essential role in pregnancy because disorders of fetal adrenal steroidogenesis that eliminate the supplies of  $C_{19}$  steroid precursors do not interfere with term gestation or with parturition (for review see Ref. 329).

## XX. Adrenarche

DHEA, DHEAS, and androstenedione, which are secreted by the adrenal zona reticularis, are generally referred to as adrenal androgens because they can be converted to testosterone, but these steroids have little if any capacity to bind to and activate androgen receptors; hence, they are androgen precursors, but not true androgens. The fetal adrenal secretes large amounts of DHEA and DHEAS, and these steroids are abundant in the newborn, but their concentrations fall rapidly as the fetal zone of the adrenal involutes after birth. After the first year of life, the adrenals of young children secrete very small amounts of DHEA, DHEAS, and androstenedione until the onset of adrenarche, usually around age 7–8, preceding the onset of puberty by about 2 yr. Adrenarche is independent of puberty, the gonads, or gonadotropins, and the mechanism by which the onset of adrenarche is triggered remains unknown (716). Secretion of DHEA and DHEAS increases during and after puberty and reaches maximal values in young adulthood, after which there is a slow, gradual decrease in these steroids in the elderly (“adrenopause”) (Fig. 16) (221). The higher concentration of DHEAS in men is probably attributable to the location of the gene for steroid sulfatase on the X chromosome: men have only one

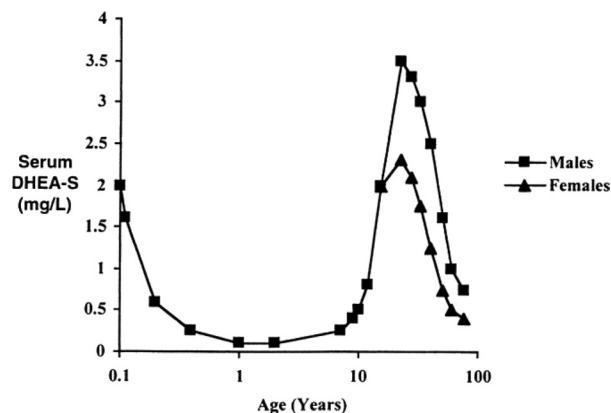

**FIG. 16.** Concentrations of DHEAS as a function of age. Note that the x-axis is on a log scale. [Derived from data in N. Orentreich, *et al.*: J Clin Endocrinol Metab 59:551–555, 1984 (221). © W. L. Miller.]

gene, and hence have less steroid sulfatase and consequently have higher DHEAS concentrations (717). Throughout much of adult life, adrenal secretion of DHEAS exceeds that of cortisol; in adult women, adrenal secretion of androstenedione and testosterone is equal to their secretion from the ovary (718). Despite the huge increases in the adrenal secretion of DHEA and DHEAS during adrenarche, circulating concentrations of ACTH and cortisol do not change with age. Thus, ACTH plays a permissive role in adrenarche but does not trigger it. Searches for hypothetical polypeptide hormones that might specifically stimulate the zona reticularis have been unsuccessful (719–721). Adrenarche is a unique phenomenon confined to few higher primates such as chimpanzees or orangutans, but the significance of adrenarche remains unknown (722, 723).

Recent studies of adrenarche have focused on the roles of  $3\beta$ HSD and P450c17. The abundance of  $3\beta$ HSD protein in the zona reticularis appears to decrease with the onset of adrenarche (202, 724, 725), and the adrenal expression of cytochrome  $b_5$ , which fosters the  $17,20$ -lyase activity of P450c17, is almost exclusively confined to the zona reticularis (203, 205, 726); both of these factors strongly favor the production of DHEA (727). The phosphorylation of P450c17 also increases  $17,20$ -lyase activity (287–289), but the kinase has not been identified (728); hence, its role in adrenarche remains uncertain. Premature and exaggerated adrenarche may be associated with insulin resistance, and girls with premature exaggerated adrenarche appear to be at much higher risk of developing the polycystic ovary syndrome as adults (characterized by hyperandrogenism, fewer ovulatory cycles, insulin resistance, and hypertriglyceridemia) (729–731), and infants born small for gestational age may be at increased risk (732). It has been suggested that replacing the DHEA lost during adrenopause may improve memory and a sense of well-being in the elderly, but meta-analysis of numerous



studies has shown little or no effect (534). Thus, studies of physiology, biochemistry, and clinical correlates of adrenarche are pointing to premature adrenarche as an early sign of a metabolic disorder.

## Acknowledgments

We thank Prof. Synthia H. Mellon (University of California, San Francisco) for help with the section on neurosteroids.

Address all correspondence and requests for reprints to: Walter L. Miller, M.D., Distinguished Professor of Pediatrics, Chief of Endocrinology, HSE 1427, University of California San Francisco, San Francisco, California 94143-0978. E-mail: wlmlab@ucsf.edu.

Disclosure Summary: W.L.M. has nothing to disclose. R.J.A. is a consultant for Ortho Biotech and Johnson & Johnson.

## References

1. Steiger M, Reichstein T 1937 Desoxy-cortico-steron (21-oxy-progesteron) aus  $\Delta$  5–3-oxy-atio-cholensaure. *Helv Chim Acta* 20:1164–1179
2. Kendall EC, Mason HL, McKenzie BF, Myers CS, Koelsche GA 1934 Isolation in crystalline form of the hormone essential to life from the supranetal cortex: its chemical nature and physiologic properties. *Trans Assoc Am Physicians* 49:147
3. Miller WL 1988 Molecular biology of steroid hormone synthesis. *Endocr Rev* 9:295–318
4. Seyle H 1946 The general adaptation syndrome and the diseases of adaptation. *J Clin Endocrinol* 6:117–230
5. O'Malley BW 2005 A life-long search for the molecular pathways of steroid hormone action. *Mol Endocrinol* 19:1402–1411
6. Gustafsson JA 2005 Steroids and the scientist. *Mol Endocrinol* 19:1412–1417
7. Chambon P 2005 The nuclear receptor superfamily: a personal retrospect on the first two decades. *Mol Endocrinol* 19:1418–1428
8. Evans RM 2005 The nuclear receptor superfamily: a Rosetta stone for physiology. *Mol Endocrinol* 19:1429–1438
9. Jensen EV 2005 The contribution of “alternative approaches” to understanding steroid hormone action. *Mol Endocrinol* 19:1439–1442
10. Auchus RJ, Miller WL 2010 The principles, enzymes and pathways of human steroidogenesis. In: DeGroot LJ, Jameson JL, eds. *Endocrinology*. 6th ed. Philadelphia: WB Saunders; 1784–1804
11. Mason JI, Rainey WE 1987 Steroidogenesis in the human fetal adrenal: a role for cholesterol synthesized de novo. *J Clin Endocrinol Metab* 64:140–147
12. Gwynne JT, Strauss 3rd JF 1982 The role of lipoproteins in steroidogenesis and cholesterol metabolism in steroidogenic glands. *Endocr Rev* 3:299–329
13. Horton JD, Goldstein JL, Brown MS 2002 SREBPs: activators of the complete program of cholesterol and fatty acid synthesis in the liver. *J Clin Invest* 109:1125–1131
14. Brown MS, Kovanen PT, Goldstein JL 1979 Receptor-mediated uptake of lipoprotein-cholesterol and its utilization for steroid synthesis in the adrenal cortex. *Rec Prog Horm Res* 35:215–257
15. Kraemer FB 2007 Adrenal cholesterol utilization. *Mol Cell Endocrinol* 265–266:42–45
16. Chang TY, Chang CC, Ohgami N, Yamauchi Y 2006 Cholesterol sensing, trafficking and esterification. *Annu Rev Cell Dev Biol* 22:129–157
17. Miller WL 2007 StAR search—what we know about how the steroidogenic acute regulatory protein mediates mitochondrial cholesterol import. *Mol Endocrinol* 21:589–601
18. Ponting CP, Aravind L 1999 START: a lipid-binding domain in StAR, HD-ZIP and signalling proteins. *Trends Biochem Sci* 24:130–132
19. Soccio RE, Breslow JL 2003 StAR-related lipid transfer (START) proteins: mediators of intracellular lipid metabolism. *J Biol Chem* 278:22183–22186
20. Riegelhaupt JJ, Waase MP, Garbarino J, Cruz DE, Breslow JL 2010 Targeted disruption of steroidogenic acute regulatory protein D4 leads to modest weight reduction and minor alterations in lipid metabolism. *J Lipid Res* 51:1134–1143
21. Haberland ME, Reynolds JA 1973 Self-association of cholesterol in aqueous solution. *Proc Natl Acad Sci USA* 70:2313–2316
22. Soccio RE, Breslow JL 2004 Intracellular cholesterol transport. *Arterioscler Thromb Vasc Biol* 24:1150–1160
23. Gallegos AM, Atshaves BP, Storey SM, Starodub O, Petrescu AD, Huang H, McIntosh AL, Martin GG, Chao H, Kier AB, Schroeder F 2001 Gene structure, intracellular localization, and functional roles of sterol carrier protein-2. *Prog Lipid Res* 40:498–563
24. Soccio RE, Adams RM, Romanowski MJ, Sehayek E, Burley SK, Breslow JL 2002 The cholesterol-regulated StarD4 gene encodes a StAR-related lipid transfer protein with two closely related homologues, StarD5 and StarD6. *Proc Natl Acad Sci USA* 99:6943–6948
25. Romanowski MJ, Soccio RE, Breslow JL, Burley SK 2002 Crystal structure of the *Mus musculus* cholesterol-regulated START protein 4 (StarD4) containing a StAR-related lipid transfer domain. *Proc Natl Acad Sci USA* 99:6949–6954
26. Tsujishita Y, Hurley JH 2000 Structure and lipid transport mechanism of a StAR-related domain. *Nat Struct Biol* 7:408–414
27. Soccio RE, Adams RM, Maxwell KN, Breslow JL 2005 Differential gene regulation of StarD4 and StarD5 cholesterol transfer proteins. *J Biol Chem* 280:19410–19418
28. Bose HS, Whittall RM, Ran Y, Bose M, Baker BY, Miller WL 2008 StAR-like activity and molten globule behavior of StARD6, a male germ-line protein. *Biochemistry* 47:2277–2288
29. Waterham HR 2006 Defects of cholesterol biosynthesis. *FEBS Lett* 580:5442–5449
30. Moser HW, Raymond GV, Dubey P 2005 Adrenoleukodystrophy: new approaches to a neurodegenerative disease. *JAMA* 294:3131–3134
31. Ligtenberg MJ, Kemp S, Sarde CO, van Geel BM, Kleijer WJ, Barth PG, Mandel JL, van Oost BA, Bolhuis PA 1995 Spectrum of mutations in the gene encoding the adrenoleukodystrophy protein. *Am J Hum Genet* 56:44–50
32. Watkins PA, Gould SJ, Smith MA, Braiterman LT, Wei HM, Kok F, Moser AB, Moser HW, Smith KD 1995 Al-

- tered expression of ALDP in X-linked adrenoleukodystrophy. *Am J Hum Genet* 57:292–301
33. McGuinness MC, Lu JF, Zhang HP, Dong GX, Heinzer AK, Watkins PA, Powers J, Smith KD 2003 Role of ALDP (ABCD1) and mitochondria in X-linked adrenoleukodystrophy. *Mol Cell Biol* 23:744–753
  34. Kemp S, Wanders RJA 2007 X-linked adrenoleukodystrophy: very long-chain fatty acid metabolism, ABC half-transporters and the complicated route to treatment. *Mol Genet Metab* 90:268–276
  35. Watkins PA, Naidu S, Moser HW 1987 Adrenoleukodystrophy: biochemical procedures in diagnosis, prevention and treatment. *J Inherit Metab Dis* 10:46–53
  36. Moser HW, Moser AE, Singh I, O'Neill BP 1984 Adrenoleukodystrophy: survey of 303 cases: biochemistry, diagnosis, and therapy. *Ann Neurol* 16:628–641
  37. Moser HW 1995 Adrenoleukodystrophy. *Curr Opin Neurol* 8:221–226
  38. Sadeghi-Nejad A, Senior B 1990 Adrenomyeloneuropathy presenting as Addison's disease in childhood. *N Engl J Med* 322:13–16
  39. Laureti S, Casucci G, Santeusano F, Angeletti G, Aubourg P, Brunetti P 1996 X-linked adrenoleukodystrophy is a frequent cause of idiopathic Addison's disease in young adult male patients. *J Clin Endocrinol Metab* 81:470–474
  40. Assmann G, Seedorf U 1995 Acid lipase deficiency: Wolman disease and cholesteryl ester storage disease. In: Scriver C, Beaudet A, Sly W, Valle D, eds. *The metabolic basis of inherited disease*. 6th ed. New York: McGraw-Hill; 2563–2587
  41. Anderson RA, Byrum RS, Coates PM, Sando GN 1994 Mutations at the lysosomal acid cholesteryl ester hydrolase gene locus in Wolman disease. *Proc Natl Acad Sci USA* 91:2718–2722
  42. Correa-Cerro LS, Porter FD 2005  $3\beta$ -Hydroxysterol  $\Delta$ -7 reductase and the Smith-Lemli-Opitz syndrome. *Mol Genet Metab* 84:112–126
  43. Andersson HC, Frentz J, Martínez JE, Tuck-Muller CM, Bellizaire J 1999 Adrenal insufficiency in Smith-Lemli-Opitz syndrome. *Am J Med Genet* 82:382–384
  44. Hall PF 1986 Cytochromes P450 and the regulation of steroid synthesis. *Steroids* 48:133–196
  45. Agarwal AK, Auchus RJ 2005 Cellular redox state regulates hydroxysteroid dehydrogenase activity and intracellular hormone potency. *Endocrinology* 146:2531–2538
  46. Gonzalez FJ 1988 The molecular biology of cytochrome P450s. *Pharmacol Rev* 40:243–288
  47. Venter JC, Adams MD, Myers EW, Li PW, Mural RJ, Sutton GG, Smith HO, Yandell M, Evans CA, Holt RA, Gocayne JD, Amanatides P, Ballew RM, Huson DH, Wortman JR, Zhang Q, Kodira CD, Zheng XH, Chen L, Skupski M, Subramanian G, Thomas PD, Zhang J, Gabor Miklos GL, *et al.* 2001 The sequence of the human genome. *Science* 291:1304–1351
  48. Lander ES, Linton LM, Birren B, Nusbaum C, Zody MC, Baldwin J, Devon K, Dewar K, Doyle M, FitzHugh W, Funke R, Gage D, Harris K, Heaford A, Howland J, Kann L, Lehoczy J, LeVine R, McEwan P, McKernan K, Meldrum J, Mesirov JP, Miranda C, Morris W, *et al.* 2001 Initial sequencing and analysis of the human genome. *Nature* 409:860–921
  49. Miller WL 2005 Regulation of steroidogenesis by electron transfer. *Endocrinology* 146:2544–2550
  50. Penning TM 1997 Molecular endocrinology of hydroxysteroid dehydrogenases. *Endocr Rev* 18:281–305
  51. Sherbet DP, Papari-Zareei M, Khan N, Sharma KK, Brandmaier A, Rambally S, Chattopadhyay A, Andersson S, Agarwal AK, Auchus RJ 2007 Cofactors, redox state, and directional preferences of hydroxysteroid dehydrogenases. *Mol Cell Endocrinol* 265–266:83–88
  52. Papari-Zareei M, Brandmaier A, Auchus RJ 2006 Arginine 276 controls the directional preference of AKR1C9 (rat liver  $3\alpha$ -hydroxysteroid dehydrogenase) in human embryonic kidney 293 cells. *Endocrinology* 147:1591–1597
  53. Sherbet DP, Guryev OL, Papari-Zareei M, Mizrahi D, Rambally S, Akbar S, Auchus RJ 2009 Biochemical factors governing the steady-state estrone/estradiol ratios catalyzed by human  $17\beta$ -hydroxysteroid dehydrogenases types 1 and 2 in HEK-293 cells. *Endocrinology* 150:4154–4162
  54. Voutilainen R, Miller WL 1987 Coordinate tropic hormone regulation of mRNAs for insulin-like growth factor II and the cholesterol side-chain cleavage enzyme, P450<sub>scc</sub>, in human steroidogenic tissues. *Proc Natl Acad Sci USA* 84:1590–1594
  55. Mesiano S, Mellon SH, Jaffe RB 1993 Mitogenic action, regulation, and localization of insulin-like growth factors in the human fetal adrenal gland. *J Clin Endocrinol Metab* 76:968–976
  56. Mesiano S, Mellon SH, Gospodarowicz D, Di Blasio AM, Jaffe RB 1991 Basic fibroblast growth factor expression is regulated by corticotropin in the human fetal adrenal: a model for adrenal growth regulation. *Proc Natl Acad Sci USA* 88:5428–5432
  57. Coulter CL, Read LC, Carr BR, Tarantal AF, Barry S, Styne DM 1996 A role for epidermal growth factor in the morphological and functional maturation of the adrenal gland in the fetal rhesus monkey *in vivo*. *J Clin Endocrinol Metab* 81:1254–1260
  58. Stocco DM, Wang X, Jo Y, Manna PR 2005 Multiple signaling pathways regulating steroidogenesis and steroidogenic acute regulatory protein expression: more complicated than we thought. *Mol Endocrinol* 19:2647–2659
  59. Arakane F, King SR, Du Y, Kallen CB, Walsh LP, Watari H, Stocco DM, Strauss 3rd JF 1997 Phosphorylation of steroidogenic acute regulatory protein (StAR) modulates its steroidogenic activity. *J Biol Chem* 272:32656–32662
  60. Pon LA, Orme-Johnson NR 1986 Acute stimulation of steroidogenesis in corpus luteum and adrenal cortex by peptide hormones. *J Biol Chem* 261:6594–6599
  61. Pon LA, Hartigan JA, Orme-Johnson NR 1986 Acute ACTH regulation of adrenal corticosteroid biosynthesis: rapid accumulation of a phosphoprotein. *J Biol Chem* 261:13309–13316
  62. Epstein LF, Orme-Johnson NR 1991 Regulation of steroid hormone biosynthesis: identification of precursors of a phosphoprotein targeted to the mitochondrion in stimulated rat adrenal cortex cells. *J Biol Chem* 266:19739–19745
  63. Stocco DM, Sodeman TC 1991 The 30-kDa mitochondrial proteins induced by hormone stimulation in MA-10 mouse Leydig tumor cells are processed from larger precursors. *J Biol Chem* 266:19731–19738
  64. Clark BJ, Wells J, King SR, Stocco DM 1994 The puri-

- fication, cloning and expression of a novel luteinizing hormone-induced mitochondrial protein in MA-10 mouse Leydig tumor cells. Characterization of the steroidogenic acute regulatory protein (StAR). *J Biol Chem* 269: 28314–28322
65. Stocco DM, Clark BJ 1996 Regulation of the acute production of steroids in steroidogenic cells. *Endocr Rev* 17: 221–244
66. Lin D, Sugawara T, Strauss 3rd JF, Clark BJ, Stocco DM, Saenger P, Rogol A, Miller WL 1995 Role of steroidogenic acute regulatory protein in adrenal and gonadal steroidogenesis. *Science* 267:1828–1831
67. Bose HS, Sugawara T, Strauss 3rd JF, Miller WL 1996 The pathophysiology and genetics of congenital lipid adrenal hyperplasia. *N Engl J Med* 335:1870–1878
68. Moore CC, Hum DW, Miller WL 1992 Identification of positive and negative placental-specific basal elements, a transcriptional repressor, and a cAMP response element in the human gene for P450<sub>sc</sub>. *Mol Endocrinol* 6:2045–2058
69. Sugawara T, Holt JA, Driscoll D, Strauss 3rd JF, Lin D, Miller WL, Patterson D, Clancy KP, Hart IM, Clark BJ 1995 Human steroidogenic acute regulatory protein (StAR): functional activity in COS-1 cells, tissue-specific expression, and mapping of the structural gene to 8p11.2 and an expressed pseudogene to chromosome 13. *Proc Natl Acad Sci USA* 92:4778–4782
70. Moog-Lutz C, Tomasetto C, Régnier CH, Wendling C, Lutz Y, Muller D, Chenard MP, Basset P, Rio MC 1997 MLN64 exhibits homology with the steroidogenic acute regulatory protein (StAR) and is over-expressed in human breast carcinomas. *Int J Cancer* 71:183–191
71. Watari H, Arakane F, Moog-Lutz C, Kallen CB, Tomasetto C, Gerton GL, Rio MC, Baker ME, Strauss 3rd JF 1997 MLN64 contains a domain with homology to the steroidogenic acute regulatory protein (StAR) that stimulates steroidogenesis. *Proc Natl Acad Sci USA* 94:8462–8467
72. Bose HS, Whittall RM, Huang MC, Baldwin MA, Miller WL 2000 N-218 MLN64, a protein with StAR-like steroidogenic activity, is folded and cleaved similarly to StAR. *Biochemistry* 39:11722–11731
73. Caron KM, Soo SC, Wetsel WC, Stocco DM, Clark BJ, Parker KL 1997 Targeted disruption of the mouse gene encoding steroidogenic acute regulatory protein provides insights into congenital lipid adrenal hyperplasia. *Proc Natl Acad Sci USA* 94:11540–11545
74. Hasegawa T, Zhao L, Caron KM, Majdic G, Suzuki T, Shizawa S, Sasano H, Parker KL 2000 Developmental roles of the steroidogenic acute regulatory protein (StAR) as revealed by StAR knockout mice. *Mol Endocrinol* 14:1462–1471
75. Miller WL, Strauss 3rd JF 1999 Molecular pathology and mechanism of action of the steroidogenic acute regulatory protein, StAR. *J Steroid Biochem Mol Biol* 69:131–141
76. Miller WL 2007 Steroidogenic acute regulatory protein (StAR), a novel mitochondrial cholesterol transporter. *Biochim Biophys Acta* 1771:663–676
77. Arakane F, Sugawara T, Nishino H, Liu Z, Holt JA, Pain D, Stocco DM, Miller WL, Strauss 3rd JF 1996 Steroidogenic acute regulatory protein (StAR) retains activity in the absence of its mitochondrial targeting sequence: implications for the mechanism of StAR action. *Proc Natl Acad Sci USA* 93:13731–13736
78. Bose HS, Lingappa VR, Miller WL 2002 Rapid regulation of steroidogenesis by mitochondrial protein import. *Nature* 417:87–91
79. Bose HS, Whittall RM, Baldwin MA, Miller WL 1999 The active form of the steroidogenic acute regulatory protein, StAR, appears to be a molten globule. *Proc Natl Acad Sci USA* 96:7250–7255
80. Baker BY, Yaworsky DC, Miller WL 2005 A pH-dependent molten globule transition is required for activity of the steroidogenic acute regulatory protein, StAR. *J Biol Chem* 280:41753–41760
81. Tuckey RC, Headlam MJ, Bose HS, Miller WL 2002 Transfer of cholesterol between phospholipid vesicles mediated by the steroidogenic acute regulatory protein (StAR). *J Biol Chem* 277:47123–47128
82. Baker BY, Epand RF, Epand RM, Miller WL 2007 Cholesterol binding does not predict activity of the steroidogenic acute regulatory protein, StAR. *J Biol Chem* 282: 10223–10232
83. Papadopoulos V 1993 Peripheral-type benzodiazepine/diazepam binding inhibitor receptor: Biological role in steroidogenic cell function. *Endocr Rev* 14:222–240
84. Hauet T, Yao ZX, Bose HS, Wall CT, Han Z, Li W, Hales DB, Miller WL, Culty M, Papadopoulos V 2005 Peripheral-type benzodiazepine receptor-mediated action of steroidogenic acute regulatory protein on cholesterol entry into Leydig cell mitochondria. *Mol Endocrinol* 19:540–554
85. Liu J, Rone MB, Papadopoulos V 2006 Protein-protein interactions mediate mitochondrial cholesterol transport and steroid biosynthesis. *J Biol Chem* 281:38879–38893
86. Bose M, Whittall RM, Miller WL, Bose HS 2008 Steroidogenic activity of StAR requires contact with mitochondrial VDAC1 and PCP. *J Biol Chem* 283:8837–8845
87. Artemenko IP, Zhao D, Hales DB, Hales KH, Jefcoate CR 2001 Mitochondrial processing of newly synthesized steroidogenic acute regulatory protein (StAR), but not total StAR, mediates cholesterol transfer to cytochrome P450 side chain cleavage enzyme in adrenal cells. *J Biol Chem* 276:46583–46596
88. Alpy F, Wendling C, Rio MC, Tomasetto C 2002 MEN-THO, a MLN64 homologue devoid of the START domain. *J Biol Chem* 277:50780–50787
89. Alpy F, Latchumanan VK, Kedinger V, Janoshazi A, Thiele C, Wendling C, Rio MC, Tomasetto C 2005 Functional characterization of the MENTAL domain. *J Biol Chem* 280:17945–17952
90. Cheruku SR, Xu Z, Dutia R, Lobel P, Storch J 2006 Mechanism of cholesterol transfer from the Niemann-Pick type C2 protein to model membranes supports a role in lysosomal cholesterol transport. *J Biol Chem* 281:31594–31604
91. Mathieu AP, Fleury A, Ducharme L, Lavigne P, LeHoux JG 2002 Insights into steroidogenic acute regulatory protein (StAR)-dependent cholesterol transfer in mitochondria: evidence from molecular modeling and structure-based thermodynamics supporting the existence of partially unfolded states of StAR. *J Mol Endocrinol* 29:327–345
92. Yaworsky DC, Baker BY, Bose HS, Best KB, Jensen LB, Bell JD, Baldwin MA, Miller WL 2005 pH-Dependent interactions of the carboxyl-terminal helix of steroidogenic



- acute regulatory protein with synthetic membranes. *J Biol Chem* 280:2045–2054
93. Murcia M, Faráldo-Gómez JD, Maxfield FR, Roux B 2006 Modeling the structure of the StART domains of MLN64 and StAR proteins in complex with cholesterol. *J Lipid Res* 47:2614–2630
  94. Sandison AT 1955 A form of lipoidosis of the adrenal cortex in an infant. *Arch Dis Childh* 30:538–541
  95. Prader A, Gurtner HP 1955 Das Syndrom des Pseudohermaphroditismus masculinus bei kongenitaler Nebennierenrindenhyperplasie ohne Androgenüberproduktion (adrenaler Pseudohermaphroditismus masculinus). *Helv Paed Acta* 10:397–412
  96. Kirkland RT, Kirkland JL, Johnson CM, Horning MG, Librik L, Clayton GW 1973 Congenital lipid adrenal hyperplasia in an eight-year-old phenotypic female. *J Clin Endocrinol Metab* 36:488–496
  97. Hauffa BP, Miller WL, Grumbach MM, Conte FA, Kaplan SL 1985 Congenital adrenal hyperplasia due to deficient cholesterol side-chain cleavage activity (20,22 desmolase) in a patient treated for 18 years. *Clin Endocrinol (Oxf)* 23:481–493
  98. Camacho AM, Kowarski A, Migeon CJ, Brough AJ 1968 Congenital adrenal hyperplasia due to a deficiency of one of the enzymes involved in the biosynthesis of pregnenolone. *J Clin Endocrinol Metab* 28:153–161
  99. Degenhart HJ, Visser HK, Boon H, O'Doherty NJ 1972 Evidence for deficiency of 20 $\alpha$  cholesterol hydroxylase activity in adrenal tissue of a patient with lipid adrenal hyperplasia. *Acta Endocrinologica* 71:512–518
  100. Koizumi S, Kyoya S, Miyawaki TM, Kidani H, Funabashi T 1977 Cholesterol side-chain cleavage enzyme activity and cytochrome P450 content in adrenal mitochondria of a patient with congenital lipid adrenal hyperplasia (Prader disease). *Clin Chim Acta* 77:301–306
  101. Matteson KJ, Chung BC, Urdea MS, Miller WL 1986 Study of cholesterol side chain cleavage (20,22 desmolase) deficiency causing congenital lipid adrenal hyperplasia using bovine-sequence P450scc oligodeoxyribonucleotide probes. *Endocrinology* 118:1296–1305
  102. Lin D, Gitelman SE, Saenger P, Miller WL 1991 Normal genes for the cholesterol side chain cleavage enzyme, P450scc, in congenital lipid adrenal hyperplasia. *J Clin Invest* 88:1955–1962
  103. Saenger P, Klonari Z, Black SM, Compagnone N, Mellon SH, Fleischer A, Abrams CA, Shackleton CH, Miller WL 1995 Prenatal diagnosis of congenital lipid adrenal hyperplasia. *J Clin Endocrinol Metab* 80:200–205
  104. Tee MK, Lin D, Sugawara T, Holt JA, Guiguen Y, Buckingham B, Strauss 3rd JF, Miller WL 1995 T $\rightarrow$ A transversion 11 bp from a splice acceptor site in the gene for steroidogenic acute regulatory protein causes congenital lipid adrenal hyperplasia. *Hum Mol Genet* 4:2299–2305
  105. Miller WL 1997 Congenital lipid adrenal hyperplasia: the human gene knockout of the steroidogenic acute regulatory protein. *J Mol Endocrinol* 19:227–240
  106. Voutilainen R, Miller WL 1986 Developmental expression of genes for the steroidogenic enzymes P450scc (20,22 desmolase), P450c17 (17 $\alpha$ -hydroxylase/17,20 lyase) and P450c21 (21-hydroxylase) in the human fetus. *J Clin Endocrinol Metab* 63:1145–1150
  107. Ogata T, Matsuo N, Saito M, Prader A 1989 The testicular lesion and sexual differentiation in congenital lipid adrenal hyperplasia. *Helv Paediatr Acta* 43:531–538
  108. Chen X, Baker BY, Abduljabbar MA, Miller WL 2005 A genetic isolate of congenital lipid adrenal hyperplasia with atypical clinical findings. *J Clin Endocrinol Metab* 90:835–840
  109. Bose HS, Pescovitz OH, Miller WL 1997 Spontaneous feminization in a 46,XX female patient with congenital lipid adrenal hyperplasia caused by a homozygous frameshift mutation in the steroidogenic acute regulatory protein. *J Clin Endocrinol Metab* 82:1511–1515
  110. Fujieda K, Tajima T, Nakae J, Sageshima S, Tachibana K, Suwa S, Sugawara T, Strauss 3rd JF 1997 Spontaneous puberty in 46,XX subjects with congenital lipid adrenal hyperplasia. *J Clin Invest* 99:1265–1271
  111. Nakae J, Tajima T, Sugawara T, Arakane F, Hanaki K, Hotsubo T, Igarashi N, Igarashi Y, Ishii T, Koda N, Kondo T, Kohno H, Nakagawa Y, Tachibana K, Takeshima Y, Tsubouchi K, Strauss 3rd JF, Fujieda K 1997 Analysis of the steroidogenic acute regulatory protein (StAR) gene in Japanese patients with congenital lipid adrenal hyperplasia. *Hum Mol Genet* 6:571–576
  112. Yoo HW, Kim GH 1998 Molecular and clinical characterization of Korean patients with congenital lipid adrenal hyperplasia. *J Pediatr Endocrinol Metab* 11:707–711
  113. Bose HS, Sato S, Aisenberg J, Shalev SA, Matsuo N, Miller WL 2000 Mutations in the steroidogenic acute regulatory protein (StAR) in six patients with congenital lipid adrenal hyperplasia. *J Clin Endocrinol Metab* 85:3636–3639
  114. Flück CE, Maret A, Mallet D, Portrat-Doyen S, Achermann JC, Leheup B, Theintz GE, Mullis PE, Morel Y 2005 A novel mutation L260P of the steroidogenic acute regulatory protein gene in three unrelated patients of Swiss ancestry with congenital lipid adrenal hyperplasia. *J Clin Endocrinol Metab* 90:5304–5308
  115. Gassner HL, Toppari J, Quinteiro González S, Miller WL 2004 Near-miss apparent SIDS from adrenal crisis. *J Pediatr* 145:178–183
  116. Baker BY, Lin L, Kim CJ, Raza J, Smith CP, Miller WL, Achermann JC 2006 Non-classic congenital lipid adrenal hyperplasia. A new disorder of the steroidogenic acute regulatory protein with very late presentation and normal male genitalia. *J Clin Endocrinol Metab* 91:4781–4785
  117. Metherell LA, Naville D, Halaby G, Begeot M, Huebner A, Nürnberg G, Nürnberg P, Green J, Tomlinson JW, Krone NP, Lin L, Racine M, Berney DM, Achermann JC, Arlt W, Clark AJ 2009 Nonclassic lipid congenital adrenal hyperplasia masquerading as familial glucocorticoid deficiency. *J Clin Endocrinol Metab* 94:3865–3871
  118. Sahakitrungruang T, Soccio RE, Lang-Muritano M, Walker JM, Achermann JC, Miller WL 2010 Clinical, genetic, and functional characterization of four patients carrying partial loss-of-function mutations in the steroidogenic acute regulatory protein (StAR). *J Clin Endocrinol Metab* 95:3352–3359
  119. Clark AJ, Metherell LA, Cheetham ME, Huebner A 2005 Inherited ACTH insensitivity illuminates the mechanisms of ACTH action. *Trends Endocrinol Metab* 16:451–457
  120. Khoury K, Barbar E, Ainmelk Y, Ouellet A, Lehoux JG 2009 Gonadal function, first cases of pregnancy, and child delivery in a woman with lipid congenital adrenal hyperplasia. *J Clin Endocrinol Metab* 94:1333–1337

121. Stone D, Hechter O 1955 Studies on ACTH action in perfused bovine adrenals: aspects of progesterone as an intermediary in cortico-steroidogenesis. *Arch Biochem Biophys* 54:121–128
122. Halkerston ID, Eichhorn J, Hechter O 1961 A requirement for reduced triphosphopyridine nucleotide for cholesterol side-chain cleavage by mitochondrial fractions of bovine adrenal cortex. *J Biol Chem* 236:374–380
123. Koritz SB, Kumar AM 1970 On the mechanism of action of adrenocorticotrophic hormone—the stimulation of the activity of enzymes involved in pregnenolone synthesis. *J Biol Chem* 245:152–159
124. Tuckey RC, Cameron KJ 1993 Catalytic properties of cytochrome P-450<sub>sc</sub>. *Biochim Biophys Acta* 1163:185–194
125. Kuwada M, Kitajima R, Suzuki H, Horie S 1991 Purification and properties of cytochrome P-450 (SCC) from pig testis mitochondria. *Biochem Biophys Res Commun* 176:1501–1508
126. Shikita M, Hall PF 1973 Cytochrome P-450 from bovine adrenocortical mitochondria: an enzyme for the side chain cleavage of cholesterol. I. Purification and properties. *J Biol Chem* 248:5598–5604
127. Shikita M, Hall PF 1973 Cytochrome P-450 from bovine adrenocortical mitochondria: an enzyme for the side chain cleavage of cholesterol. II. Subunit structure. *J Biol Chem* 248:5605–5609
128. Simpson ER 1979 Cholesterol side-chain cleavage, cytochrome P450, and the control of steroidogenesis. *Mol Cell Endocrinol* 13:213–227
129. Guryev O, Carvalho RA, Usanov S, Gilep A, Estabrook RW 2003 A pathway for the metabolism of vitamin D<sub>3</sub>: unique hydroxylated metabolites formed during catalysis with cytochrome P450<sub>sc</sub> (CYP11A1). *Proc Natl Acad Sci USA* 100:14754–14759
130. Morohashi K, Fujii-Kuriyama Y, Okada Y, Sogawa K, Hirose T, Inayama S, Omura T 1984 Molecular cloning and nucleotide sequence of cDNA for mRNA of mitochondrial P450(sc) of bovine adrenal cortex. *Proc Natl Acad Sci USA* 81:4647–4651
131. Chung BC, Matteson KJ, Voutilainen R, Mohandas TK, Miller WL 1986 Human cholesterol side-chain cleavage enzyme, P450<sub>sc</sub>: cDNA cloning, assignment of the gene to chromosome 15, and expression in the placenta. *Proc Natl Acad Sci USA* 83:8962–8966
132. Morohashi K, Sogawa K, Omura T, Fujii-Kuriyama Y 1987 Gene structure of human cytochrome P-450(sc), cholesterol desmolase. *J Biochem* 101:879–887
133. Black SM, Harikrishna JA, Szklarz GD, Miller WL 1994 The mitochondrial environment is required for activity of the cholesterol side-chain cleavage enzyme, cytochrome P450<sub>sc</sub>. *Proc Natl Acad Sci USA* 91:7247–7251
134. Yang X, Iwamoto K, Wang M, Artwohl J, Mason JI, Pang S 1993 Inherited congenital adrenal hyperplasia in the rabbit is caused by a deletion in the gene encoding cytochrome P450 cholesterol side-chain cleavage enzyme. *Endocrinology* 132:1977–1982
135. Hu MC, Hsu NC, El Hadj NB, Pai CI, Chu HP, Wang CK, Chung BC 2002 Steroid deficiency syndromes in mice with targeted disruption of Cyp11a1. *Mol Endocrinol* 16:1943–1950
136. Tajima T, Fujieda K, Kouda N, Nakae J, Miller WL 2001 Heterozygous mutation in the cholesterol side chain cleavage enzyme (P450<sub>sc</sub>) gene in a patient with 46,XY sex reversal and adrenal insufficiency. *J Clin Endocrinol Metab* 86:3820–3825
137. Kim CJ, Lin L, Huang N, Quigley CA, AvRuskin TW, Achermann JC, Miller WL 2008 Severe combined adrenal and gonadal deficiency caused by novel mutations in the cholesterol side chain cleavage enzyme, P450<sub>sc</sub>. *J Clin Endocrinol Metab* 93:696–702
138. John ME, John MC, Boggaram V, Simpson ER, Waterman MR 1986 Transcriptional regulation of steroid hydroxylase genes by corticotropin. *Proc Natl Acad Sci USA* 83:4715–4719
139. Mellon SH, Vaisse C 1989 cAMP regulates P450<sub>sc</sub> gene expression by a cycloheximide-insensitive mechanism in cultured mouse Leydig MA-10 cells. *Proc Natl Acad Sci USA* 86:7775–7779
140. Barrett PQ, Bollag WB, Isaacs CM, McCarthy RT, Rasmussen H 1989 The role of calcium in angiotensin II-mediated aldosterone secretion. *Endocr Rev* 10:496–518
141. Moore CC, Brentano ST, Miller WL 1990 Human P450<sub>sc</sub> gene transcription is induced by cyclic AMP and repressed by 12-O-tetradecanoylphorbol-13-acetate and A23187 by independent *cis*-elements. *Mol Cell Biol* 10:6013–6023
142. Huang N, Miller WL 2000 Cloning of factors related to HIV-inducible LBP proteins that regulate steroidogenic factor-1-independent human placental transcription of the cholesterol side-chain cleavage enzyme, P450<sub>sc</sub>. *J Biol Chem* 275:2852–2858
143. Huang N, Miller WL 2005 LBP proteins mediate SF1-independent expression of P450<sub>sc</sub> in human placental JEG-3 cells. *Mol Endocrinol* 19:409–420
144. Henderson YC, Frederick MJ, Jayakumar A, Choi Y, Wang MT, Kang Y, Evans R, Spring PM, Uesugi M, Clayman GL 2007 Human LBP-32/MGR is a repressor of the P450<sub>sc</sub> in human choriocarcinoma cell line JEG-3. *Placenta* 28:152–160
145. Henderson YC, Frederick MJ, Wang MT, Hollier LM, Clayman GL 2008 LBP-1b, LBP-9, and LBP-32/MGR detected in syncytiotrophoblasts from first-trimester human placental tissue and their transcriptional regulation. *DNA Cell Biol* 27:71–79
146. Baulieu EE 1997 Neurosteroids: of the nervous system, by the nervous system, for the nervous system. *Recent Prog Horm Res* 52:1–32
147. Parker KL, Schimmer BP 1997 Steroidogenic factor 1: a key determinant of endocrine development and function. *Endocr Rev* 18:361–377
148. Morohashi Ki 1999 Gonadal and extragonadal functions of Ad4BP/SF-1: developmental aspects. *Trends Endocrinol Metab* 10:169–173
149. Gizard F, Lavallée B, DeWitte F, Hum DW 2001 A novel zinc finger protein TReP-132 interacts with CPB/p300 to regulate human CYP11A1 gene expression. *J Biol Chem* 276:33881–33892
150. Gizard F, Lavallée B, DeWitte F, Teissier E, Staels B, Hum DW 2002 The transcriptional regulating protein of 132 kDa (TReP-132) enhances P450<sub>sc</sub> gene transcription through interaction with steroidogenic factor-1 in human adrenal cells. *J Biol Chem* 277:39144–39155
151. Sewer MB, Dammer EB, Jagarlapudi S 2007 Transcriptional regulation of adrenocortical steroidogenic gene expression. *Drug Metab Rev* 39:371–388

152. Schimmer BP, White PC 2010 Minireview: steroidogenic factor 1: its roles in differentiation, development, and disease. *Mol Endocrinol* 24:1322–1337
153. Katsumata N, Ohtake M, Hojo T, Ogawa E, Hara T, Sato N, Tanaka T 2002 Compound heterozygous mutations in the cholesterol side-chain cleavage enzyme gene (*CYP11A*) cause congenital adrenal insufficiency in humans. *J Clin Endocrinol Metab* 87:3808–3813
154. Hiort O, Holterhus PM, Werner R, Marschke C, Hoppe U, Partsch CJ, Riepe FG, Achermann JC, Struve D 2005 Homozygous disruption of P450 side-chain cleavage (*CYP11A1*) is associated with prematurity, complete 46,XY sex reversal, and severe adrenal failure. *J Clin Endocrinol Metab* 90:538–541
155. al Kandari H, Katsumata N, Alexander S, Rasoul MA 2006 Homozygous mutation of P450 side-chain cleavage enzyme gene (*CYP11A1*) in 46,XY patient with adrenal insufficiency, complete sex reversal and agenesis of corpus callosum. *J Clin Endocrinol Metab* 91:2821–2826
156. Rubtsov P, Karmanov M, Sverdlova P, Spirin P, Tiulpakov A 2009 A novel homozygous mutation in *CYP11A1* gene is associated with late-onset adrenal insufficiency and hypospadias in a 46,XY patient. *J Clin Endocrinol Metab* 94:936–939
157. Sahakitrunguang T, Tee MK, Blackett PR, Miller WL 2010 Partial defect in the cholesterol side-chain cleavage enzyme P450<sub>scc</sub> (*CYP11A1*) resembling non-classic congenital lipid adrenal hyperplasia. 10.1210/jc.2010-1828
158. Voutilainen R, Tapanainen J, Chung BC, Matteson KJ, Miller WL 1986 Hormonal regulation of P450<sub>scc</sub> (20,22-desmolase) and P450<sub>c17</sub> (17 $\alpha$ -hydroxylase/17,20-lyase) in cultured human granulosa cells. *J Clin Endocrinol Metab* 63:202–207
159. Tsigos C, Arai K, Hung W, Chrousos GP 1993 Hereditary isolated glucocorticoid deficiency is associated with abnormalities of the adrenocorticotropin receptor gene. *J Clin Invest* 92:2458–2461
160. Martens JW, Verhoef-Post M, Abelin N, Ezabella M, Toledo SP, Brunner HG, Themmen AP 1998 A homozygous mutation in the luteinizing hormone receptor causes partial Leydig cell hypoplasia: correlation between receptor activity and phenotype. *Mol Endocrinol* 12:775–784
161. Shenker A 1995 G protein-coupled receptor structure and function: the impact of disease-causing mutations. *Baillieres Clin Endocrinol Metab* 9:427–451
162. Zhang P, Rodriguez H, Mellon SH 1995 Transcriptional regulation of P450<sub>scc</sub> gene expression in neural and in steroidogenic cells: implications for regulation of neurosteroidogenesis. *Mol Endocrinol* 9:1571–1582
163. Luo X, Ikeda Y, Parker KL 1994 A cell-specific nuclear receptor is essential for adrenal and gonadal development and sexual differentiation. *Cell* 77:481–490
164. Nachtigal MW, Hirokawa Y, Enyeart-VanHouten DL, Flanagan JN, Hammer GD, Ingraham HA 1998 Wilms' tumor and Dax-1 modulate the orphan nuclear receptor SF-1 in sex-specific gene expression. *Cell* 93:445–454
165. Hammer GD, Krylova I, Zhang Y, Darimont BD, Simpson K, Weigel NL, Ingraham HA 1999 Phosphorylation of the nuclear receptor SF-1 modulates cofactor recruitment: integration of hormone signaling in reproduction and stress. *Mol Cell* 3:521–526
166. Chen WY, Lee WC, Hsu NC, Huang F, Chung BC 2004 SUMO modification of repression domains modulates function of nuclear receptor 5A1 (steroidogenic factor-1). *J Biol Chem* 279:38730–38735
167. Solish SB, Picado-Leonard J, Morel Y, Kuhn RW, Mohandas TK, Hanukoglu I, Miller WL 1988 Human adrenodoxin reductase: two mRNAs encoded by a single gene on chromosome 17cen  $\rightarrow$  q25 are expressed in steroidogenic tissues. *Proc Natl Acad Sci USA* 85:7104–7108
168. Lin D, Shi YF, Miller WL 1990 Cloning and sequence of the human adrenodoxin reductase gene. *Proc Natl Acad Sci USA* 87:8516–8520
169. Chang CY, Wu DA, Lai CC, Miller WL, Chung BC 1988 Cloning and structure of the human adrenodoxin gene. *DNA* 7:609–615
170. Picado-Leonard J, Voutilainen R, Kao LC, Chung BC, Strauss 3rd JF, Miller WL 1988 Human adrenodoxin: cloning of three cDNAs and cycloheximide enhancement in JEG-3 cells. *J Biol Chem* 263:3240–3244
171. Brentano ST, Black SM, Lin D, Miller WL 1992 cAMP post-transcriptionally diminishes the abundance of adrenodoxin reductase mRNA. *Proc Natl Acad Sci USA* 89:4099–4103
172. Sparkes RS, Klisak I, Miller WL 1991 Regional mapping of genes encoding human steroidogenic enzymes: P450<sub>scc</sub> to 15q23–q24, adrenodoxin to 11q22; adrenodoxin reductase to 17q24–q25; and P450<sub>c17</sub> to 10q24–q25. *DNA Cell Biol* 10:359–365
173. Brandt ME, Vickery LE 1992 Expression and characterization of human mitochondrial ferredoxin reductase in *Escherichia coli*. *Arch Biochem Biophys* 294:735–740
174. Freeman MR, Dobritsa A, Gaines P, Segreaves WA, Carlson JR 1999 The dare gene: steroid hormone production, olfactory behavior, and neural degeneration in *Drosophila*. *Development* 126:4591–4602
175. Ziegler GA, Vonnrhein C, Hanukoglu I, Schulz GE 1999 The structure of adrenodoxin reductase of mitochondrial P450 systems: electron transfer for steroid biosynthesis. *J Mol Biol* 289:981–990
176. Vickery LE 1997 Molecular recognition and electron transfer in mitochondrial steroid hydroxylase systems. *Steroids* 62:124–127
177. Brandt ME, Vickery LE 1993 Charge pair interactions stabilizing ferredoxin-ferredoxin reductase complexes: identification by complementary site-specific mutations. *J Biol Chem* 268:17126–17130
178. Wada A, Waterman MR 1992 Identification by site-directed mutagenesis of two lysine residues in cholesterol side chain cleavage cytochrome P450 that are essential for adrenodoxin binding. *J Biol Chem* 267:22877–22882
179. Hanukoglu I, Suh BS, Himmelhoch S, Amsterdam A 1990 Induction and mitochondrial localization of cytochrome P450<sub>scc</sub> system enzymes in normal and transformed ovarian granulosa cells. *J Cell Biol* 111:1373–1381
180. Voutilainen R, Picado-Leonard J, DiBlasio AM, Miller WL 1988 Hormonal and developmental regulation of human adrenodoxin mRNA in steroidogenic tissues. *J Clin Endocrinol Metab* 66:383–388
181. Müller A, Müller JJ, Müller YA, Uhlmann H, Bernhardt R, Heinemann U 1998 New aspects of electron transfer revealed by the crystal structure of a truncated bovine adrenodoxin, Adx(4-108). *Structure* 6:269–280



182. Coghlan VM, Vickery LE 1991 Site-specific mutations in human ferredoxin that affect binding to ferredoxin reductase and cytochrome P450<sub>scc</sub>. *J Biol Chem* 266:18606–18612
183. Harikrishna JA, Black SM, Szklarz GD, Miller WL 1993 Construction and function of fusion enzymes of the human cytochrome P450<sub>scc</sub> system. *DNA Cell Biol* 12:371–379
184. Cao PR, Bülow H, Dumas B, Bernhardt R 2000 Construction and characterization of a catalytic fusion protein system: P-45011 $\beta$ -adrenodoxin reductase-adrenodoxin. *Biochim Biophys Acta* 1476:253–264
185. Thomas JL, Myers RP, Strickler RC 1989 Human placental 3 $\beta$ -hydroxy-5-ene-steroid dehydrogenase and steroid 5 $\Delta$ 4-ene-isomerase: purification from mitochondria and kinetic profiles, biophysical characterization of the purified mitochondrial and microsomal enzymes. *J Steroid Biochem* 33:209–217
186. Lachance Y, Luu-The V, Labrie C, Simard J, Dumont M, de Launoit Y, Guérin S, Leblanc G, Labrie F 1990 Characterization of human 3 $\beta$ -hydroxysteroid dehydrogenase/ $\Delta^5 \rightarrow \Delta^4$ -isomerase gene and its expression in mammalian cells. *J Biol Chem* 265:20469–20475
187. Lorence MC, Murry BA, Trant JM, Mason JI 1990 Human 3 $\beta$ -hydroxysteroid dehydrogenase/ $\Delta^5 \rightarrow \Delta^4$  isomerase from placenta: expression in nonsteroidogenic cells of a protein that catalyzes the dehydrogenation/isomerization of C21 and C19 steroids. *Endocrinology* 126:2493–2498
188. Lee TC, Miller WL, Auchus RJ 1999 Medroxyprogesterone acetate and dexamethasone are competitive inhibitors of different human steroidogenic enzymes. *J Clin Endocrinol Metab* 84:2104–2110
189. Auchus RJ, Lee TC, Miller WL 1998 Cytochrome b<sub>5</sub> augments the 17,20 lyase activity of human P450<sub>c17</sub> without direct electron transfer. *J Biol Chem* 273:3158–3165
190. Thomas JL, Frieden C, Nash WE, Strickler RC 1995 An NADH-induced conformational change that mediates the sequential 3 $\beta$ -hydroxysteroid dehydrogenase/isomerase activities is supported by affinity labeling and the time-dependent activation of isomerase. *J Biol Chem* 270:21003–21008
191. Lorence MC, Corbin CJ, Kamimura N, Mahendroo MS, Mason JI 1990 Structural analysis of the gene encoding human 3 $\beta$ -hydroxysteroid dehydrogenase/ $\Delta^5$ - $\Delta^4$  isomerase. *Mol Endocrinol* 4:1850–1855
192. Simard J, Ricketts ML, Gingras S, Soucy P, Feltus FA, Melner MH 2005 Molecular biology of the 3 $\beta$ -hydroxysteroid dehydrogenase/ $\Delta^5$ - $\Delta^4$ -isomerase gene family. *Endocr Rev* 26:525–582
193. Rhéaume E, Lachance Y, Zhao HF, Breton N, Dumont M, de Launoit Y, Trudel C, Luu-The V, Simard J, Labrie F 1991 Structure and expression of a new complementary DNA encoding the almost exclusive 3 $\beta$ -hydroxysteroid dehydrogenase/ $\Delta^5$ - $\Delta^4$ -isomerase in human adrenals and gonads. *Mol Endocrinol* 5:1147–1157
194. Bongiovanni AM, Kellenbenz G 1962 The adrenogenital syndrome with deficiency of 3 $\beta$ -hydroxysteroid dehydrogenase. *J Clin Invest* 41:2086–2092
195. Moisan AM, Ricketts ML, Tardy V, Desrochers M, Mébarki F, Chaussain JL, Cabrol S, Raux-Demay MC, Forest MG, Sippell WG, Peter M, Morel Y, Simard J 1999 New insight into the molecular basis of 3 $\beta$ -hydroxysteroid dehydrogenase deficiency: identification of eight mutations in the HSD3B2 gene eleven patients from seven families and comparison of the functional properties of twenty-five mutant enzymes. *J Clin Endocrinol Metab* 84:4410–4425
196. Thomas JL, Berko EA, Faustino A, Myers RP, Strickler RC 1988 Human placental 3 $\beta$ -hydroxy-5-ene-steroid dehydrogenase and steroid 5/4-ene-isomerase: purification from microsomes, substrate kinetics, and inhibition by product steroids. *J Steroid Biochem* 31:785–793
197. Thomas JL, Mason JI, Brandt S, Spencer Jr BR, Norris W 2002 Structure/function relationships responsible for the kinetic differences between human type 1 and type 2 3 $\beta$ -hydroxysteroid dehydrogenase and for the catalysis of the type 1 activity. *J Biol Chem* 277:42795–42801
198. Cherradi N, Rossier MF, Vallotton MB, Timberg R, Friedberg I, Orly J, Wang XJ, Stocco DM, Capponi AM 1997 Submitochondrial distribution of three key steroidogenic proteins (steroidogenic acute regulatory protein and cytochrome P450<sub>scc</sub> and 3 $\beta$ -hydroxysteroid dehydrogenase isomerase enzymes) upon stimulation by intracellular calcium in adrenal glomerulosa cells. *J Biol Chem* 272:7899–7907
199. Chapman JC, Polanco JR, Min S, Michael SD 2005 Mitochondrial 3 $\beta$ -hydroxysteroid dehydrogenase (HSD) is essential for the synthesis of progesterone by corpora lutea: an hypothesis. *Reprod Biol Endocrinol* 3:11
200. Mesiano S, Coulter CL, Jaffe RB 1993 Localization of cytochrome P450 cholesterol side-chain cleavage, cytochrome P450 17 $\alpha$ -hydroxylase/17,20 lyase, and 3 $\beta$ -hydroxysteroid dehydrogenase-isomerase steroidogenic enzymes in human and rhesus monkey fetal adrenal glands: reappraisal of functional zonation. *J Clin Endocrinol Metab* 77:1184–1189
201. Suzuki T, Sasano H, Takeyama J, Kaneko C, Freije WA, Carr BR, Rainey WE 2000 Developmental changes in steroidogenic enzymes in human postnatal adrenal cortex: immunohistochemical studies. *Clin Endocrinol (Oxf)* 53:739–747
202. Endoh A, Kristiansen SB, Casson PR, Buster JE, Hornsby PJ 1996 The zona reticularis is the site of biosynthesis of dehydroepiandrosterone and dehydroepiandrosterone sulfate in the adult human adrenal cortex resulting from its low expression of 3 $\beta$ -hydroxysteroid dehydrogenase. *J Clin Endocrinol Metab* 81:3558–3565
203. Mapes S, Corbin CJ, Tarantal A, Conley A 1999 The primate adrenal zona reticularis is defined by expression of cytochrome b<sub>5</sub>, 17 $\alpha$ -hydroxylase/17,20-lyase cytochrome P450 (P450<sub>c17</sub>) and NADPH-cytochrome P450 reductase (reductase) but not 3 $\beta$ -hydroxysteroid dehydrogenase/ $\Delta^5$ -4 isomerase (3 $\beta$ -HSD). *J Clin Endocrinol Metab* 84:3382–3385
204. Nguyen AD, Mapes SM, Corbin CJ, Conley AJ 2008 Morphological adrenarche in rhesus macaques: development of the zona reticularis is concurrent with fetal zone regression in the early neonatal period. *J Endocrinol* 199:367–378
205. Hui XG, Akahira J, Suzuki T, Nio M, Nakamura Y, Suzuki H, Rainey WE, Sasano H 2009 Development of the human adrenal zona reticularis: morphometric and immunocytochemical studies from birth to adolescence. *J Endocrinol* 203:241–252
206. Remer T, Boye KR, Hartmann MF, Wudy SA 2005 Urinary markers of adrenarche: reference values in healthy subjects, aged 3–18 years. *J Clin Endocrinol Metab* 90:2015–2021

207. Rhéaume E, Simard J, Morel Y, Mebarki F, Zachmann M, Forest MG, New MI, Labrie F 1992 Congenital adrenal hyperplasia due to point mutations in the type II  $3\beta$ -hydroxysteroid dehydrogenase gene. *Nat Genet* 1:239–245
208. Chang YT, Kappy MS, Iwamoto K, Wang J, Yang X, Pang S 1993 Mutations in the type II  $3\beta$ -hydroxysteroid dehydrogenase gene in a patient with classic salt-wasting  $3\beta$ -HSD deficiency congenital adrenal hyperplasia. *Pediatr Res* 34:698–700
209. Simard J, Rhéaume E, Sanchez R, Laflamme N, de Launoit Y, Luu-The V, van Seters AP, Gordon RD, Bettendorf M, Heinrich U, Moshang T, New MI, Labrie F 1993 Molecular basis of congenital adrenal hyperplasia due to  $3\beta$ -hydroxysteroid dehydrogenase deficiency. *Mol Endocrinol* 7:716–728
210. Morel Y, Mébarki F, Rhéaume E, Sanchez R, Forest MG, Simard J 1997 Structure-function relationships of  $3\beta$ -hydroxysteroid dehydrogenase: contribution made by the molecular genetics of  $3\beta$ -hydroxysteroid dehydrogenase deficiency. *Steroids* 62:176–184
211. Cara JF, Moshang Jr T, Bongiovanni AM, Marx BS 1985 Elevated 17-hydroxy-progesterone and testosterone in a newborn with  $3\beta$ -hydroxysteroid dehydrogenase deficiency. *N Engl J Med* 313:618–621
212. Pang S, Carbutaru G, Haider A, Copeland KC, Chang YT, Lutfallah C, Mason JI 2003 Carriers for type II  $3\beta$ -hydroxysteroid dehydrogenase (HSD3B2) deficiency can only be identified by *HSD3B2* genotype study and not by hormone test. *Clin Endocrinol (Oxf)* 58:323–331
213. Rosenfield RL, Rich BH, Wolfsdorf JL, Cassola F, Parks JS, Bongiovanni AM, Wu CH, Shackleton CHL 1980 Pubertal presentation of congenital  $\Delta^5$ - $3\beta$ hydroxysteroid dehydrogenase deficiency. *J Clin Endocrinol Metab* 51:345–353
214. Pang S, Levine LS, Stoner E, Opitz JM, Pollack MS, Dupont B, New MI 1983 Nonsalt-losing congenital adrenal hyperplasia due to  $3\beta$ -hydroxysteroid dehydrogenase deficiency with normal glomerulosa function. *J Clin Endocrinol Metab* 56:808–818
215. Pang SY, Lerner AJ, Stoner E, Levine LS, Oberfield SE, Engel I, New MI 1985 Late-onset adrenal steroid  $3\beta$ -hydroxysteroid dehydrogenase deficiency. I. A cause of hirsutism in pubertal and postpubertal women. *J Clin Endocrinol Metab* 60:428–439
216. Chang YT, Zhang L, Alkaddour HS, Mason JI, Lin K, Yang X, Garibaldi LR, Bourdony CJ, Dolan LM, Donaldson DL, Pang SY 1995 Absence of molecular defect in the type II  $3\beta$ -hydroxysteroid dehydrogenase ( $3\beta$ -HSD) gene in premature pubarche children and hirsute female patients with moderately decreased adrenal  $3\beta$ -HSD activity. *Pediatr Res* 37:820–824
217. Sakkal-Alkaddour H, Zhang L, Yang X, Chang YT, Kappy M, Slover RS, Jorgensen V, Pang S 1996 Studies of  $3\beta$ -hydroxysteroid dehydrogenase genes in infants and children manifesting premature pubarche and increased adrenocorticotropin-stimulated  $\Delta^5$ -steroid levels. *J Clin Endocrinol Metab* 81:3961–3965
218. Lutfallah C, Wang W, Mason JI, Chang YT, Haider A, Rich B, Castro-Magana M, Copeland KC, David R, Pang S 2002 Newly proposed hormonal criteria via genotypic proof for type II  $3\beta$ -hydroxysteroid dehydrogenase deficiency. *J Clin Endocrinol Metab* 87:2611–2622
219. Mermejo LM, Elias LL, Marui S, Moreira AC, Mendonça BB, de Castro M 2005 Refining hormonal diagnosis of  $3\beta$ -hydroxysteroid dehydrogenase deficiency in patients with premature pubarche and hirsutism based on *HSD3B2* genotyping. *J Clin Endocrinol Metab* 90:1287–1293
220. Apter D, Pakarinen A, Hammond GL, Vihko R 1979 Adrenocortical function in puberty. *Acta Paediatr Scand* 68:599–604
221. Orentreich N, Brind JL, Rizer RL, Vogelmann JH 1984 Age changes and sex differences in serum dehydroepiandrosterone sulfate concentrations throughout adulthood. *J Clin Endocrinol Metab* 59:551–555
222. Zachmann M, Völlmin JA, Hamilton W, Prader A 1972 Steroid 17,20 desmolase deficiency: a new cause of male pseudohermaphroditism. *Clin Endocrinol (Oxf)* 1:369–385
223. Nakajin S, Shively JE, Yuan PM, Hall PF 1981 Microsomal cytochrome P450 from neonatal pig testis: two enzymatic activities ( $17\alpha$ -hydroxylase and C17,20-lyase) associated with one protein. *Biochemistry* 20:4037–4042
224. Nakajin S, Hall PF 1981 Microsomal cytochrome P450 from neonatal pig testis. Purification and properties of a C<sub>21</sub> steroid side-chain cleavage system ( $17\alpha$ -hydroxylase-C<sub>17,20</sub> lyase). *J Biol Chem* 256:3871–3876
225. Nakajin S, Shinoda M, Haniu M, Shively JE, Hall PF 1984 C<sub>21</sub> steroid side-chain cleavage enzyme from porcine adrenal microsomes. Purification and characterization of the  $17\alpha$ -hydroxylase/C<sub>17,20</sub> lyase cytochrome P450. *J Biol Chem* 259:3971–3976
226. Zuber MX, Simpson ER, Waterman MR 1986 Expression of bovine  $17\alpha$ -hydroxylase cytochrome P450 cDNA in non-steroidogenic (COS-1) cells. *Science* 234:1258–1261
227. Lin D, Harikrishna JA, Moore CC, Jones KL, Miller WL 1991 Missense mutation Ser<sup>106</sup>→Pro causes  $17\alpha$ -hydroxylase deficiency. *J Biol Chem* 266:15992–15998
228. Matteson KJ, Picado-Leonard J, Chung BC, Mohandas TK, Miller WL 1986 Assignment of the gene for adrenal P450c17 ( $17\alpha$ -hydroxylase/17,20 lyase) to human chromosome 10. *J Clin Endocrinol Metab* 63:789–791
229. Fan YS, Sasi R, Lee C, Winter JS, Waterman MR, Lin CC 1992 Localization of the human CYP17 gene (cytochrome P450 17 $\alpha$ ) to 10q24.3 by fluorescence *in situ* hybridization and simultaneous chromosome banding. *Genomics* 14:1110–1111
230. Chung BC, Picado-Leonard J, Haniu M, Bienkowski M, Hall PF, Shively JE, Miller WL 1987 Cytochrome P450c17 (steroid  $17\alpha$ -hydroxylase/17,20 lyase): cloning of human adrenal and testis cDNAs indicates the same gene is expressed in both tissues. *Proc Natl Acad Sci USA* 84:407–411
231. Picado-Leonard J, Miller WL 1987 Cloning and sequence of the human gene encoding P450c17 (steroid  $17\alpha$ -hydroxylase/17,20 lyase): similarity to the gene for P450c21. *DNA* 6:439–448
232. Lee-Robichaud P, Wright JN, Akhtar ME, Akhtar M 1995 Modulation of the activity of human  $17\alpha$ -hydroxylase-17,20-lyase (CYP17) by cytochrome b<sub>5</sub>: endocrinological and mechanistic implications. *Biochem J* 308:901–908
233. Katagiri M, Kagawa N, Waterman MR 1995 The role of cytochrome b<sub>5</sub> in the biosynthesis of androgens by human P450c17. *Arch Biochem Biophys* 317:343–347
234. Qiao J, Chen X, Zuo CL, Gu YY, Liu BL, Liang J, Lu YL,

- Tang JF, Wu YX, Chen MD, Chen JL, Wu WL, Song HD 2010 Identification of steroid biosynthetic defects in genotype-proven heterozygous individuals for 17 $\alpha$ -hydroxylase/17,20-lyase deficiency. *Clin Endocrinol (Oxf)* 72:312–319
235. Nakajin S, Takahashi M, Shinoda M, Hall PF 1985 Cytochrome b<sub>5</sub> promotes the synthesis of  $\Delta^{16}$ -C<sub>19</sub> steroids by homogeneous cytochrome P-450 C21 side-chain cleavage from pig testis. *Biochem Biophys Res Commun* 132:708–713
236. Sinclair PA, Squires EJ 2005 Testicular sulfoconjugation of the 16-androstene steroids by hydroxysteroid sulfotransferase: its effect on the concentrations of 5 $\alpha$ -androstenedione in plasma and fat of the mature domestic boar. *J Anim Sci* 83:358–365
237. Lin D, Black SM, Nagahama Y, Miller WL 1993 Steroid 17 $\alpha$ -hydroxylase and 17,20 lyase activities of P450c17: contributions of serine<sup>106</sup> and P450 reductase. *Endocrinology* 132:2498–2506
238. Flück CE, Miller WL, Auchus RJ 2003 The 17,20 lyase activity of cytochrome P450c17 from human fetal testis favors the  $\Delta^5$  steroidogenic pathway. *J Clin Endocrinol Metab* 88:3762–3766
239. Ortiz de Montellano PR 1986 Oxygen activation and reactivity. In: Ortiz de Montellano P, ed. *Cytochrome P-450: structure mechanism and biochemistry*. New York: Plenum Press; 217–271
240. Auchus RJ, Miller WL 1999 Molecular modeling of human P450c17 (17 $\alpha$ -hydroxylase/17,20-lyase): insights into reaction mechanisms and effects of mutations. *Mol Endocrinol* 13:1169–1182
241. Auchus RJ, Sampath Kumar A, Andrew Boswell C, Gupta MK, Bruce K, Rath NP, Covey DF 2003 The enantiomer of progesterone (*ent*-progesterone) is a competitive inhibitor of human cytochromes P450c17 and P450c21. *Arch Biochem Biophys* 409:134–144
242. Arlt W, Auchus RJ, Miller WL 2001 Thiazolidinediones but not metformin directly inhibit the steroidogenic enzymes P450c17 and 3 $\beta$ -hydroxysteroid dehydrogenase. *J Biol Chem* 276:16767–16771
243. Kossor DC, Kominami S, Takemori S, Colby HD 1992 Destruction of testicular cytochrome P-450 by 7 $\alpha$ -thiospiro-nolactone is catalyzed by the 17 $\alpha$ -hydroxylase. *J Steroid Biochem Mol Biol* 42:421–424
244. Lara Jr PN, Redman MW, Kelly K, Edelman MJ, Williamson SK, Crowley JJ, Gandara DR 2008 Phase I clinical trial of a selective inhibitor of CYP17, abiraterone acetate, confirms that castration-resistant prostate cancer commonly remains hormone driven. *J Clin Oncol* 26:463–467
245. O'Donnell A, Judson I, Dowsett M, Raynaud F, Dearnaley D, Mason M, Harland S, Robbins A, Halbert G, Nutley B, Jarman M 2004 Hormonal impact of the 17 $\alpha$ -hydroxylase/C(17,20)-lyase inhibitor abiraterone acetate (CB7630) in patients with prostate cancer. *Brit J Cancer* 90:2317–2325
246. Slominski A, Ermak G, Mihm M 1996 ACTH receptor, CYP11A1, CYP17 and CYP21A2 genes are expressed in skin. *J Clin Endocrinol Metab* 81:2746–2749
247. Dalla Valle L, Couët J, Labrie Y, Simard J, Belvedere P, Simontacchi C, Labrie F, Colombo L 1995 Occurrence of cytochrome P450c17 mRNA and dehydroepiandrosterone biosynthesis in the rat gastrointestinal tract. *Mol Cell Endocrinol* 111:83–92
248. Le Goascogne C, Sananès N, Eychenne B, Gouézou M, Baulieu EE, Robel P 1995 Androgen biosynthesis in the stomach: expression of cytochrome P450 17 $\alpha$ -hydroxylase/17,20 lyase messenger ribonucleic acid and protein, and metabolism of pregnenolone and progesterone by parietal cells of the rat gastric mucosa. *Endocrinology* 136:1744–1752
249. Compagnone NA, Zhang P, Vigne JL, Mellon SH 2000 Novel role for the nuclear phosphoprotein SET in transcriptional activation of P450c17 and initiation of neurosteroidogenesis. *Mol Endocrinol* 14:875–888
250. Rodriguez H, Hum DW, Staels B, Miller WL 1997 Transcription of the human genes for cytochrome P450csc and P450c17 is regulated differently in human adrenal NCI-H295 cells than in mouse adrenal Y1 cells. *J Clin Endocrinol Metab* 82:365–371
251. Lin CJ, Martens JW, Miller WL 2001 NF-1c, Sp1 and Sp3 are essential for transcription of the human gene for P450c17 (steroid 17 $\alpha$ -hydroxylase/17,20 lyase) in human adrenal NCI-H295A cells. *Mol Endocrinol* 15:1277–1293
252. Sewer MB, Nguyen VQ, Huang CJ, Tucker PW, Kagawa N, Waterman MR 2002 Transcriptional activation of human CYP17 in H295R adrenocortical cells depends on complex formation between p54nrb/NonO, PSF and SF-1, a complex which also participates in repression of transcription. *Endocrinology* 143:1280–1290
253. Jimenez P, Saner K, Mayhew B, Rainey WE 2003 GATA-6 is expressed in the human adrenal and regulates transcription of genes required for adrenal androgen biosynthesis. *Endocrinology* 144:4285–4288
254. Flück CE, Miller WL 2004 GATA-4 and GATA-6 modulate tissue-specific transcription of the human gene for P450c17 by direct interaction with Sp1. *Mol Endocrinol* 18:1144–1157
255. Sewer MB, Jagarlapudi S 2009 Complex assembly on the human CYP17 promoter. *Mol Cell Endocrinol* 300:109–114
256. Urs AN, Dammer E, Sewer MB 2006 Sphingosine regulates the transcription of CYP17 by binding to steroidogenic factor-1. *Endocrinology* 147:5249–5258
257. Li D, Urs AN, Allegood J, Leon A, Merrill Jr AH, Sewer MB 2007 cAMP-stimulated interaction between steroidogenic factor-1 and diacylglycerol kinase facilitates induction of CYP17. *Mol Cell Biol* 27:6669–6685
258. Shea-Eaton WK, Trinidad MJ, Lopez D, Nackley A, McLean MP 2001 Sterol regulatory element binding protein-1a regulation of the steroidogenic acute regulatory protein gene. *Endocrinology* 142:1525–1533
259. Ozbay T, Rowan A, Leon A, Patel P, Sewer MB 2006 Cyclic adenosine 5'-monophosphate-dependent sphingosine-1-phosphate biosynthesis induces human CYP17 gene transcription by activating cleavage of sterol regulatory element binding protein 1. *Endocrinology* 147:1427–1437
260. Huang N, Dardis A, Miller WL 2005 Regulation of cytochrome b5 gene expression by Sp3, GATA-6, and NF-1 in human adrenal NCI-H295A cells. *Mol Endocrinol* 19:2020–2034
261. Biglieri EG, Herron MA, Brust N 1966 17-Hydroxylation deficiency in man. *J Clin Invest* 45:1946–1954
262. Yanase T, Simpson ER, Waterman MR 1991 17 $\alpha$ -Hydroxylase/17,20 lyase deficiency: from clinical investigation to molecular definition. *Endocr Rev* 12:91–108



263. Scaroni C, Opocher G, Mantero F 1986 Renin-angiotensin-aldosterone system: a long-term follow-up study in 17 $\alpha$ -hydroxylase deficiency syndrome. *Clin Exp Hypertens A* 8:773–780
264. New MI, Suvannakul L 1970 Male pseudohermaphroditism due to 17 $\alpha$ -hydroxylase deficiency. *J Clin Invest* 49:1930–1941
265. D'Armiento M, Reda G, Kater C, Shackleton CH, Biglieri EG 1983 17 $\alpha$ -Hydroxylase deficiency: mineralocorticoid hormone profiles in an affected family. *J Clin Endocrinol Metab* 56:697–701
266. Wit JM, van Roermund HP, Oostdijk W, Benraad TJ, Thijssen JH, Boer P, Jansen M, Spit M, van den Brande JL 1988 Heterozygotes for 17 $\alpha$ -hydroxylase deficiency can be detected with a short ACTH test. *Clin Endocrinol (Oxf)* 28:657–664
267. Auchus RJ 2001 The genetics, pathophysiology, and management of human deficiencies of P450c17. *Endocrinol Metab Clin North Am* 30:101–119, vii
268. Rosa S, Duff C, Meyer M, Lang-Muritano M, Balercia G, Boscaro M, Topaloglu AK, Mioni R, Fallo F, Zuliani L, Mantero F, Schoenle EJ, Biason-Lauber A 2007 P450c17 deficiency: clinical and molecular characterization of six patients. *J Clin Endocrinol Metab* 92:1000–1007
269. Imai T, Yanase T, Waterman MR, Simpson ER, Pratt JJ 1992 Canadian Mennonites and individuals residing in the Friesland region of the Netherlands share the same molecular basis of 17 $\alpha$ -hydroxylase deficiency. *Hum Genet* 89:95–96
270. Fardella CE, Zhang LH, Mahachoklertwattana P, Lin D, Miller WL 1993 Deletion of amino acids Asp<sup>487</sup>-Ser<sup>488</sup>-Phe<sup>489</sup> in human cytochrome P450c17 causes severe 17 $\alpha$ -hydroxylase deficiency. *J Clin Endocrinol Metab* 77:489–493
271. Lam CW, Arlt W, Chan CK, Honour JW, Lin CJ, Tong SF, Choy KW, Miller WL 2001 Mutation of proline 409 to arginine in the meander region of cytochrome P450c17 causes severe 17 $\alpha$ -hydroxylase deficiency. *Mol Genet Metab* 72:254–259
272. Miura K, Yasuda K, Yanase T, Yamakita N, Sasano H, Nawata H, Inoue M, Fukaya T, Shizuta Y 1996 Mutation of cytochrome P-45017  $\alpha$  gene (CYP17) in a Japanese patient previously reported as having glucocorticoid-responsive hyperaldosteronism: with a review of Japanese patients with mutations of CYP17. *J Clin Endocrinol Metab* 81:3797–3801
273. Costa-Santos M, Kater CE, Auchus RJ 2004 Two prevalent CYP17 mutations and genotype-phenotype correlations in 24 Brazilian patients with 17-hydroxylase deficiency. *J Clin Endocrinol Metab* 89:49–60
274. Newton-Cheh C, Johnson T, Gateva V, Tobin MD, Bochud M, Coin L, Najjar SS, Zhao JH, Heath SC, Eyheramendy S, Papadakis K, Voight BF, Scott LJ, Zhang F, Farrall M, Tanaka T, Wallace C, Chambers JC, Khaw KT, Nilsson P, van der Harst P, Polidoro S, Grobbee DE, Onland-Moret NC, Bots ML, *et al.* 2009 Genome-wide association study identifies eight loci associated with blood pressure. *Nat Genet* 41:666–676
275. Levy D, Ehret GB, Rice K, Verwoert GC, Launer LJ, Dehghan A, Glazer NL, Morrison AC, Johnson AD, Aspelund T, Aulchenko Y, Lumley T, Köttgen A, Vasan RS, Rivadeneira F, Eiriksdottir G, Guo X, Arking DE, Mitchell GF, Mattace-Raso FU, Smith AV, Taylor K, Scharpf RB, Hwang SJ, Sijbrands EJ, *et al.* 2009 Genome-wide association study of blood pressure and hypertension. *Nat Genet* 41:677–687
276. Gupta MK, Geller DH, Auchus RJ 2001 Pitfalls in characterizing P450c17 mutations associated with isolated 17,20 lyase deficiency. *J Clin Endocrinol Metab* 86:4416–4423
277. Yanase T, Waterman MR, Zachmann M, Winter JS, Simpson ER, Kagimoto M 1992 Molecular basis of apparent isolated 17,20-lyase deficiency: compound heterozygous mutations in the C-terminal region (Arg496→Cys, Gln461→Stop) actually cause combined 17 $\alpha$ -hydroxylase/17,20-lyase deficiency. *Biochem Biophys Acta* 1139:275–279
278. Zachmann M, Kempken B, Manella B, Navarro E 1992 Conversion from pure 17,20 desmolase to combined 17,20-desmolase/17 $\alpha$ -hydroxylase deficiency with age. *Acta Endocrinol (Copenh)* 127:97–99
279. Geller DH, Auchus RJ, Mendonça BB, Miller WL 1997 The genetic and functional basis of isolated 17,20 lyase deficiency. *Nat Genet* 17:201–205
280. Geller DH, Auchus RJ, Miller WL 1999 P450c17 mutations R347H and R358Q selectively disrupt 17,20-lyase activity by disrupting interactions with P450 oxidoreductase and cytochrome b<sub>5</sub>. *Mol Endocrinol* 13:167–175
281. Van Den Akker EL, Koper JW, Boehmer AL, Themmen AP, Verhoef-Post M, Timmerman MA, Otten BJ, Drop SL, De Jong FH 2002 Differential inhibition of 17 $\alpha$ -hydroxylase and 17,20 lyase activities by three novel missense CYP17 mutations identified in patients with P450c17 deficiency. *J Clin Endocrinol Metab* 87:5714–5721
282. Sherbet DP, Tiosano D, Kwist KM, Hochberg Z, Auchus RJ 2003 CYP17 mutation E305G causes isolated 17,20 lyase deficiency by selectively altering substrate binding. *J Biol Chem* 278:48563–48569
283. HersHKovitz E, Parvari R, Wudy SA, Hartmann MF, Gomes LG, Loewental N, Miller WL 2008 Apparent isolated 17,20 lyase deficiency caused by homozygous mutation G539R in P450 oxidoreductase. *J Clin Endocrinol Metab* 93:3584–3588
284. Lee-Robichaud P, Akhtar ME, Akhtar M 1998 Control of androgen biosynthesis in the human through the interaction of Arg<sup>347</sup> and Arg<sup>358</sup> of CYP17 with cytochrome b<sub>5</sub>. *Biochem J* 332:293–296
285. Giordano SJ, Kaftory A, Steggles AW 1994 A splicing mutation in the cytochrome b<sub>5</sub> gene from a patient with congenital methemoglobinemia and pseudohermaphroditism. *Hum Genet* 93:568–570
286. Kok RC, Timmerman MA, Wolffenbittel KP, Drop SL, de Jong FH 2010 Isolated 17,20-lyase deficiency due to the cytochrome b<sub>5</sub> mutation W27X. *J Clin Endocrinol Metab* 95:994–999
287. Zhang LH, Rodriguez H, Ohno S, Miller WL 1995 Serine phosphorylation of human P450c17 increases 17,20 lyase activity: implications for adrenarche and for the polycystic ovary syndrome. *Proc Natl Acad Sci USA* 92:10619–10623
288. Pandey AV, Mellon SH, Miller WL 2003 Protein phosphatase 2A and phosphoprotein SET regulate androgen production by P450c17. *J Biol Chem* 278:2837–2844
289. Pandey AV, Miller WL 2005 Regulation of 17,20 lyase

- activity by cytochrome  $b_5$  and by serine phosphorylation of P450c17. *J Biol Chem* 280:13265–13271
290. **Biason-Lauber A, Zachmann M, Schoenle EJ** 2000 Effect of leptin on CYP17 enzymatic activities in human adrenal cells: new insight in the onset of adrenarche. *Endocrinology* 141:1446–1454
291. **Yanagibashi K, Hall PF** 1986 Role of electron transport in the regulation of the lyase activity of C-21 side-chain cleavage P450 from porcine adrenal and testicular microsomes. *J Biol Chem* 261:8429–8433
292. **Miller WL, Auchus RJ, Geller DH** 1997 The regulation of 17,20 lyase activity. *Steroids* 62:133–142
293. **Ono T, Bloch K** 1975 Solubilization and partial characterization of rat liver squalene epoxidase. *J Biol Chem* 250:1571–1579
294. **Ilan Z, Ilan R, Cinti DL** 1981 Evidence for a new physiological role of hepatic NADPH:ferricytochrome (P-450) oxidoreductase. Direct electron input to the microsomal fatty acid chain elongation system. *J Biol Chem* 256:10066–10072
295. **Wilks A, Black SM, Miller WL, Ortiz de Montellano PR** 1995 Expression and characterization of truncated human heme oxygenase (hHO-1) and a fusion protein of hHO-1 with human cytochrome P450 reductase. *Biochemistry* 34:4421–4427
296. **Enoch HG, Strittmatter P** 1979 Cytochrome  $b_5$  reduction by NADPH-cytochrome P-450 reductase. *J Biol Chem* 254:8976–8981
297. **Yamano S, Aoyama T, McBride OW, Hardwick JP, Gelboin HV, Gonzalez FJ** 1989 Human NADPH-P450 oxidoreductase: complementary DNA cloning, sequence, vaccinia virus-mediated expression, and localization of the CYPOR gene to chromosome 7. *Mol Pharmacol* 36:83–88
298. **Wang M, Roberts DL, Paschke R, Shea TM, Masters BS, Kim JJ** 1997 Three-dimensional structure of NADPH-cytochrome P450 reductase: prototype for FMN- and FAD-containing enzymes. *Proc Natl Acad Sci USA* 94:8411–8416
299. **Ellis J, Gutierrez A, Barsukov IL, Huang WC, Grossmann JG, Roberts GC** 2009 Domain motion in cytochrome P450 reductase. Conformational equilibria revealed by NMR and small-angle x-ray scattering. *J Biol Chem* 284:36628–36637
300. **Lamb DC, Kim Y, Yermalitskaya LV, Yermalitsky VN, Lepesheva GI, Kelly SL, Waterman MR, Podust LM** 2006 A second FMN binding site in yeast NADPH-cytochrome P450 reductase suggests a mechanism of electron transfer by diflavin reductases. *Structure* 14:51–61
301. **Sevrioukova IF, Li H, Zhang H, Peterson JA, Poulos TL** 1999 Structure of a cytochrome P450-redox partner electron-transfer complex. *Proc Natl Acad Sci USA* 96:1863–1868
302. **Hasemann CA, Kurumbail RG, Boddupalli SS, Peterson JA, Deisenhofer J** 1995 Structure and function of cytochromes P450: a comparative analysis of three crystal structures. *Structure* 3:41–62
303. **Scott RR, Gomes LG, Huang N, Van Vliet G, Miller WL** 2007 Apparent manifest heterozygosity in P450 oxidoreductase deficiency and its effect on coexisting 21-hydroxylase deficiency. *J Clin Endocrinol Metab* 92:2318–2322
304. **Huang N, Agrawal V, Giacomini KM, Miller WL** 2008 Genetics of P450 oxidoreductase. Sequence variation in 842 individuals of four ethnicities and activities of 15 missense mutants. *Proc Natl Acad Sci USA* 105:1733–1738
305. **Huang N, Pandey AV, Agrawal V, Reardon W, Lapunzina PD, Mowat D, Jabs EW, Van Vliet G, Sack J, Flück CE, Miller WL** 2005 Diversity and function of mutations in P450 oxidoreductase in patients with Antley-Bixler syndrome and disordered steroidogenesis. *Am J Hum Genet* 76:729–749
306. **Gomes LG, Huang N, Agrawal V, Mendonça BB, Bachega TA, Miller WL** 2008 The common P450 oxidoreductase variant A503V is not a modifier gene for 21-hydroxylase deficiency. *J Clin Endocrinol Metab* 93:2913–2916
307. **Agrawal V, Huang N, Miller WL** 2008 Pharmacogenetics of P450 oxidoreductase: effect of sequence variants on activities of CYP1A2 and CYP2C19. *Pharmacogenet Genomics* 18:569–576
308. **Sandee D, Morrissey K, Agrawal V, Tam HK, Kramer MA, Tracy TS, Giacomini KM, Miller WL** 2010 Effects of genetic variants of P450 oxidoreductase on catalysis by CYP2D6 in vitro. *Pharmacogenet Genomics* 20:677–686
309. **Agrawal V, Choi JH, Giacomini KM, Miller WL** 2010 Substrate-specific modulation of CYP3A4 activity by genetic variants of cytochrome P450 oxidoreductase (POR). *Pharmacogenet Genomics* 20:611–618
310. **Shen AL, O'Leary KA, Kasper CB** 2002 Association of multiple developmental defects and embryonic lethality with loss of microsomal NADPH-cytochrome P450 oxidoreductase. *J Biol Chem* 277:6536–6541
311. **Otto DM, Henderson CJ, Carrie D, Davey M, Gundersen TE, Blomhoff R, Adams RH, Tickle C, Wolf CR** 2003 Identification of novel roles of the P450 system in early embryogenesis: effects on vasculogenesis and retinoic acid homeostasis. *Mol Cell Biol* 23:6103–6116
312. **Henderson CJ, Otto DM, Carrie D, Magnuson MA, McLaren AW, Rosewell I, Wolf CR** 2003 Inactivation of the hepatic cytochrome P450 system by conditional deletion of hepatic cytochrome P450 reductase. *J Biol Chem* 278:13480–13486
313. **Gu J, Weng Y, Zhang QY, Cui H, Behr M, Wu L, Yang W, Zhang L, Ding X** 2003 Liver-specific deletion of the NADPH-cytochrome P450 reductase gene. Impact on plasma cholesterol homeostasis and the function and regulation of microsomal cytochrome P450 and heme oxygenases. *J Biol Chem* 278:25895–25901
314. **Flück CE, Tajima T, Pandey AV, Arlt W, Okuhara K, Verge CF, Jabs EW, Mendonça BB, Fujieda K, Miller WL** 2004 Mutant P450 oxidoreductase causes disordered steroidogenesis with and without Antley-Bixler syndrome. *Nat Genet* 36:228–230
315. **Adachi M, Tachibana K, Asakura Y, Yamamoto T, Hanaki K, Oka A** 2004 Compound heterozygous mutation of cytochrome P450 oxidoreductase gene (POR) in two patients with Antley-Bixler syndrome. *Am J Med Genet* 128A:333–339
316. **Arlt W, Walker EA, Draper N, Ivison HE, Ride JP, Hammer F, Chalder SM, Borucka-Mankiewicz M, Hauffa BP, Malunowicz EM, Stewart PM, Shackleton CH** 2004 Congenital adrenal hyperplasia caused by mutant P450 oxidoreductase and human androgen synthesis: analytical study. *Lancet* 363:2128–2135
317. **Fukami M, Horikawa R, Nagai T, Tanaka T, Naiki Y,**

- Sato N, Okuyama T, Nakai H, Soneda S, Tachibana K, Matsuo N, Sato S, Homma K, Nishimura G, Hasegawa T, Ogata T 2005 Cytochrome P450 oxidoreductase gene mutations and Antley-Bixler syndrome with abnormal genitalia and/or impaired steroidogenesis: molecular and clinical studies in 10 patients. *J Clin Endocrinol Metab* 90:414–426
318. Flück CE, Miller WL 2006 P450 oxidoreductase deficiency: a new form of congenital adrenal hyperplasia. *Curr Opin Pediatr* 18:435–441
  319. Scott RR, Miller WL 2008 Genetic and clinical features of P450 oxidoreductase deficiency. *Horm Res* 69:266–275
  320. Peterson RE, Imperato-McGinley J, Gautier T, Shackleton C 1985 Male pseudohermaphroditism due to multiple defects in steroid-biosynthetic microsomal mixed-function oxidases: a new variant of congenital adrenal hyperplasia. *N Engl J Med* 313:1182–1191
  321. Małunowicz E, Romer TE, Szarras-Czapnik M, Mielniczuk Z, Gajewska D 1987 Combined deficiency of 17  $\alpha$ -hydroxylase and 21-hydroxylase in an 8 year-old girl. *Endokrynol Pol* 38:117–124
  322. Augarten A, Pariente C, Gazit E, Chayen R, Goldfarb H, Sack J 1992 Ambiguous genitalia due to partial activity of cytochromes P450c17 and P450c21. *J Steroid Biochem Mol Biol* 41:37–41
  323. Leiber E, Herschkovitz E, Lauber-Biason A, Phillip M, Zachmann M 1997 Subnormal cortisol response to adrenocorticotropin in isolated partial 17,20-lyase activity. *J Pediatr Endocrinol Metab* 10:387–390
  324. Adachi M, Tachibana K, Asakura Y, Suwa S, Nishimura G 1999 A male patient presenting with major clinical symptoms of glucocorticoid deficiency and skeletal dysplasia, showing a steroid pattern compatible with 17 $\alpha$ -hydroxylase/17,20 lyase deficiency, but without obvious CYP17 gene mutations. *Endocr J* 46:285–292
  325. Miller WL 1986 Congenital adrenal hyperplasia. *N Engl J Med* 314:1321–1322
  326. Conte FA, Grumbach MM, Ito Y, Fisher CR, Simpson ER 1994 A syndrome of female pseudohermaphroditism, hypergonadotropic hypogonadism, and multicystic ovaries associated with missense mutations in the gene encoding aromatase (P450arom). *J Clin Endocrinol Metab* 78:1287–1292
  327. Grumbach MM, Auchus RJ 1999 Estrogen: consequences and implications of human mutations in synthesis and action. *J Clin Endocrinol Metab* 84:4677–4694
  328. Pandey AV, Kempn  P, Hofer G, Mullis PE, Fl ck CE 2007 Modulation of human CYP19A1 activity by mutant NADPH P450 oxidoreductase. *Mol Endocrinol* 21:2579–2595
  329. Miller WL 1998 Steroid hormone biosynthesis and actions in the materno-feto-placental unit. *Clin Perinatol* 25:799–817, v
  330. Shackleton C, Marcos J, Arlt W, Hauffa BP 2004 Prenatal diagnosis of P450 oxidoreductase deficiency (ORD): a disorder causing low pregnancy estriol, maternal and fetal virilization, and the Antley-Bixler syndrome phenotype. *Am J Med Genet* 129A:105–112
  331. Fukami M, Hasegawa T, Horikawa R, Ohashi T, Nishimura G, Homma K, Ogata T 2006 Cytochrome P450 oxidoreductase deficiency in three patients initially regarded as having 21-hydroxylase deficiency and/or aromatase deficiency: diagnostic value of urine steroid hormone analysis. *Pediatr Res* 59:276–280
  332. Wilson JD, Auchus RJ, Leihy MW, Guryev OL, Estabrook RW, Osborn SM, Shaw G, Renfree MB 2003 5 $\alpha$ -Androstane-3 $\alpha$ ,17 $\beta$ -diol is formed in tammar wallaby pouch young testes by a pathway involving 5 $\alpha$ -pregnane-3 $\alpha$ ,17 $\alpha$ -diol-20-one as a key intermediate. *Endocrinology* 144:575–580
  333. Auchus RJ 2004 The backdoor pathway to dihydrotestosterone. *Trends Endocrinol Metab* 15:432–438
  334. Goto M, Piper Hanley K, Marcos J, Wood PJ, Wright S, Postle AD, Cameron IT, Mason JI, Wilson DI, Hanley NA 2006 In humans, early cortisol biosynthesis provides a mechanism to safeguard female sexual development. *J Clin Invest* 116:953–960
  335. Sahakitrungruang T, Huang N, Tee MK, Agrawal V, Russell WE, Crock P, Murphy N, Migeon CJ, Miller WL 2009 Clinical, genetic and enzymatic characterization of P450 oxidoreductase deficiency in four patients. *J Clin Endocrinol Metab* 94:4992–5000
  336. Debeljak N, Fink M, Rozman D 2003 Many facets of mammalian lanosterol 14 $\alpha$ -demethylase from the evolutionarily conserved cytochrome P450 family CYP51. *Arch Biochem Biophys* 409:159–171
  337. Kelley RI, Kratz LE, Glaser RL, Netzloff ML, Wolf LM, Jabs EW 2002 Abnormal sterol metabolism in a patient with Antley-Bixler syndrome and ambiguous genitalia. *Am J Med Genet* 110:95–102
  338. Pursley TJ, Blomquist IK, Abraham J, Andersen HF, Bartley JA 1996 Fluconazole-induced congenital anomalies in three infants. *Clin Infect Dis* 22:336–340
  339. Aleck KA, Bartley DL 1997 Multiple malformation syndrome following fluconazole use in pregnancy: report of an additional patient. *Am J Med Genet* 72:253–256
  340. Cooper MK, Wassif CA, Krakowiak PA, Taipale J, Gong R, Kelley RI, Porter FD, Beachy PA 2003 A defective response to Hedgehog signaling in disorders of cholesterol biosynthesis. *Nat Genet* 33:508–513
  341. Gofflot F, Hars C, Illien F, Chevy F, Wolf C, Picard JJ, Roux C 2003 Molecular mechanisms underlying limb anomalies associated with cholesterol deficiency during gestation: implications of Hedgehog signaling. *Hum Mol Genet* 12:1187–1198
  342. Schmidt K, Hughes C, Chudek JA, Goodyear SR, Aspd n RM, Talbot R, Gundersen TE, Blomhoff R, Henderson C, Wolf CR, Tickle C 2009 Cholesterol metabolism: the main pathway acting downstream of cytochrome P450 oxidoreductase in skeletal development of the limb. *Mol Cell Biol* 29:2716–2729
  343. Aguilar A, Wu S, De Luca F 2009 P450 oxidoreductase expressed in rat chondrocytes modulates chondrogenesis via cholesterol- and Indian Hedgehog-dependent mechanisms. *Endocrinology* 150:2732–2739
  344. Bridges A, Gruenke L, Chang YT, Vakser IA, Loew G, Waskell L 1998 Identification of the binding site on cytochrome P450 2B4 for cytochrome b5 and cytochrome P450 reductase. *J Biol Chem* 273:17036–17049
  345. Yamazaki H, Johnson WW, Ueng YF, Shimada T, Guengerich FP 1996 Lack of electron transfer from cytochrome b<sub>5</sub> in stimulation of catalytic activities of cytochrome P450 3A4. Characterization of a reconstituted cytochrome P450 3A4/NADPH-cytochrome P450 reductase



- system and studies of apo-cytochrome b<sub>5</sub>. *J Biol Chem* 271:27438–27444
346. Muskett FW, Kelly GP, Whitford D 1996 The solution structure of bovine ferricytochrome b<sub>5</sub> determined using heteronuclear NMR methods. *J Mol Biol* 258:172–189
  347. Falzone CJ, Mayer MR, Whiteman EL, Moore CD, Lecomte JT 1996 Design challenges for hemoproteins: the solution structure of apocytochrome b<sub>5</sub>. *Biochemistry* 35: 6519–6526
  348. Lee-Robichaud P, Kaderbhai MA, Kaderbhai N, Wright JN, Akhtar M 1997 Interaction of human CYP17 (P-45017 $\alpha$ , 17 $\alpha$ -hydroxylase-17,20 lyase) with cytochrome b<sub>5</sub>: importance of the orientation of the hydrophobic domain of cytochrome b<sub>5</sub>. *Biochem J* 321:857–863
  349. Naffin-Olivos JL, Auchus RJ 2006 Human cytochrome b<sub>5</sub> requires residues E48 and E49 to stimulate the 17,20-lyase activity of cytochrome P450c17. *Biochemistry* 45:755–762
  350. Miller WL, Morel Y 1989 Molecular genetics of 21-hydroxylase deficiency. *Ann Rev Genet* 23:371–393
  351. Morel Y, Miller WL 1991 Clinical and molecular genetics of congenital adrenal hyperplasia due to 21-hydroxylase deficiency. *Adv Hum Genet* 20:1–68
  352. White PC, Speiser PW 2000 Congenital adrenal hyperplasia due to 21-hydroxylase deficiency. *Endocr Rev* 21:245–291
  353. Speiser PW, White PC 2003 Congenital adrenal hyperplasia. *N Engl J Med* 349:776–788
  354. Forest MG 2004 Recent advances in the diagnosis and management of congenital adrenal hyperplasia due to 21-hydroxylase deficiency. *Hum Reprod Update* 10:469–485
  355. Kominami S, Ochi H, Kobayashi Y, Takemori S 1980 Studies on the steroid hydroxylation system in adrenal cortex microsomes: purification and characterization of cytochrome P450 specific for steroid 21 hydroxylation. *J Biol Chem* 255:3386–3394
  356. White PC, New MI, Dupont B 1984 HLA-linked congenital adrenal hyperplasia results from a defective gene encoding a cytochrome P450 specific for steroid 21-hydroxylation. *Proc Natl Acad Sci USA* 81:7505–7509
  357. Higashi Y, Yoshioka H, Yamane M, Gotoh O, Fujii-Kuriyama Y 1986 Complete nucleotide sequence of two steroid 21-hydroxylase genes tandemly arranged in human chromosome: a pseudogene and genuine gene. *Proc Natl Acad Sci USA* 83:2841–2845
  358. White PC, New MI, Dupont B 1986 Structure of the human steroid 21-hydroxylase genes. *Proc Natl Acad Sci USA* 83:5111–5115
  359. Rodrigues NR, Dunham I, Yu CY, Carroll MC, Porter RR, Campbell RD 1987 Molecular characterization of the HLA-linked steroid 21-hydroxylase B gene from an individual with congenital adrenal hyperplasia. *EMBO J* 6:1653–1661
  360. Dupont B, Oberfield SE, Smithwick EM, Lee TD, Levine LS 1977 Close genetic linkage between HLA and congenital adrenal hyperplasia (21-hydroxylase deficiency). *Lancet* 2:1309–1312
  361. Speiser PW, Dupont J, Zhu D, Serrat J, Buegeleisen M, Tusie-Luna MT, Lesser M, New MI, White PC 1992 Disease expression and molecular genotype in congenital adrenal hyperplasia due to 21-hydroxylase deficiency. *J Clin Invest* 90:584–595
  362. Wedell A, Thilén A, Ritzén EM, Stengler B, Luthman H 1994 Mutational spectrum of the steroid 21-hydroxylase gene in Sweden: implications for genetic diagnosis and association with disease manifestation. *J Clin Endocrinol Metab* 78:1145–1152
  363. Tusie-Luna MT, Speiser PW, Dumic M, New MI, White PC 1991 A mutation (Pro-30 to Leu) in CYP21 represents a potential nonclassic steroid 21-hydroxylase deficiency allele. *Mol Endocrinol* 5:685–692
  364. Helmberg A, Tusie-Luna MT, Tabarelli M, Kofler R, White PC 1992 R339H and P453S: CYP21 mutations associated with nonclassic steroid 21-hydroxylase deficiency that are not apparent gene conversion. *Mol Endocrinol* 6:1318–1322
  365. Casey ML, MacDonald PC 1982 Extra-adrenal formation of a mineralocorticoid: deoxycorticosterone and deoxycorticosterone sulfate biosynthesis and metabolism. *Endocr Rev* 3:396–403
  366. Mellon SH, Miller WL 1989 Extra-adrenal steroid 21-hydroxylation is not mediated by P450c21. *J Clin Invest* 84:1497–1502
  367. Yamazaki H, Shimada T 1997 Progesterone and testosterone hydroxylation by cytochromes P450 2C19, 2C9 and 3A4. *Arch Biochem Biophys* 346:161–169
  368. Gomes LG, Huang N, Agrawal V, Mendonça BB, Bachega TA, Miller WL 2009 Extra-adrenal 21-hydroxylation by CYP2C19 and CYP3A4: effect on 21-hydroxylase deficiency. *J Clin Endocrinol Metab* 94:89–95
  369. Carroll MC, Campbell RD, Porter RR 1985 Mapping of steroid 21-hydroxylase genes to complement component C4 genes in HLA, the major histocompatibility locus in man. *Proc Natl Acad Sci USA* 82:521–525
  370. White PC, Grossberger D, Onufer BJ, Chaplin DD, New MI, Dupont B, Strominger JL 1985 Two genes encoding steroid 21-hydroxylase are located near the genes encoding the fourth component of complement in man. *Proc Natl Acad Sci USA* 82:1089–1093
  371. Bristow J, Gitelman SE, Tee MK, Staels B, Miller WL 1993 Abundant adrenal-specific transcription of the human P450c21A “pseudogene.” *J Biol Chem* 268:12919–12924
  372. Chang SF, Chung BC 1995 Difference in transcriptional activity of two homologous CYP21A genes. *Mol Endocrinol* 9:1330–1336
  373. Chung BC, Matteson KJ, Miller WL 1986 Structure of the bovine gene for P450c21 (steroid 21-hydroxylase) defines a novel cytochrome P450 gene family. *Proc Natl Acad Sci USA* 83:4243–4247
  374. Amor M, Tosi M, Duponchel C, Steinmetz M, Meo T 1985 Liver cDNA probes disclose two cytochrome P450 genes duplicated in tandem with the complement C4 loci of the mouse H-2S region. *Proc Natl Acad Sci USA* 82:4453–4457
  375. Skow LC, Womack JE, Petresh JM, Miller WL 1988 Synteny mapping of the genes for steroid 21-hydroxylase,  $\alpha$ -A-crystallin, and class I bovine leukocyte antigen (BoLA) in cattle. *DNA* 7:143–149
  376. Parker KL, Chaplin DD, Wong M, Seidman JG, Smith JA, Schimmer BP 1985 Expression of murine 21-hydroxylase in mouse adrenal glands and in transfected Y1 adrenocortical tumor cells. *Proc Natl Acad Sci USA* 82:7860–7864
  377. Chaplin DD, Galbraith LJ, Seidman JG, White PC, Parker KL 1986 Nucleotide sequence analysis of murine 21-hydroxylase

- genes: mutations affecting gene expression. *Proc Natl Acad Sci USA* 83:9601–9605
378. John ME, Okamura T, Dee A, Adler B, John MC, White PC, Simpson ER, Waterman MR 1986 Bovine steroid 21-hydroxylase: regulation of biosynthesis. *Biochemistry* 25:2846–2853
  379. Gitelman SE, Bristow J, Miller WL 1992 Mechanism and consequences of the duplication of the human C4/P450c21/gene X locus. *Mol Cell Biol* 12:2124–2134
  380. Geffrotin C, Chardon P, de Andres-Cara DF, Feil R, Renard C, Vaiman M 1990 The swine steroid 21-hydroxylase gene (CYP21): cloning and mapping within the swine leukocyte antigen locus. *Anim Genet* 21:1–13
  381. Krone N, Braun A, Roscher AA, Knorr D, Schwarz HP 2000 Predicting phenotype in steroid 21-hydroxylase deficiency? Comprehensive genotyping in 155 unrelated, well defined patients from southern Germany. *J Clin Endocrinol Metab* 85:1059–1065
  382. Partanen J, Koskimies S, Sipilä I, Lipsanen V 1989 Major histocompatibility-complex gene markers and restriction fragment analysis of steroid 21-hydroxylase (CYP21) and complement C4 genes in classical adrenal hyperplasia patients in a single population. *Am J Hum Genet* 44:660–670
  383. Dupont B, Pollack MS, Levine LS, O'Neill GJ, Hawkins BR, New MI 1981 Congenital adrenal hyperplasia: joint report from the Eighth International Histocompatibility Workshop. In: Terasaki P, ed. *Histocompatibility testing* 1980. Berlin: Springer Verlag; 693–706
  384. Fleischnick E, Awdeh ZL, Raum D, Granados J, Alosco SM, Crigler Jr JF, Gerald PS, Giles CM, Yunis EJ, Alper CA 1983 Extended MHC haplotypes in 21-hydroxylase deficiency congenital adrenal hyperplasia: shared genotypes in unrelated patients. *Lancet* 1:152–156
  385. Höller W, Scholz S, Knorr D, Bidlingmaier F, Keller E, Albert ED 1985 Genetic differences in the salt-wasting, simple virilizing, and nonclassical types of congenital adrenal hyperplasia. *J Clin Endocrinol Metab* 60:757–763
  386. Pollack MS, Levine LS, O'Neill GJ, Pang S, Lorenzen F, Kohn B, Rondanini GF, Chiumello G, New MI, Dupont B 1981 HLA linkage and B14, DR1, BfS haplotype association with the genes for late onset and cryptic 21-hydroxylase deficiency. *Am J Hum Genet* 33:540–550
  387. Speiser PW, New MI, White PC 1988 Molecular genetic analysis of nonclassical steroid 21-hydroxylase deficiency associated with HLA-B14DR1. *N Engl J Med* 319:19–23
  388. Morel Y, André J, Uring-Lambert B, Hauptmann G, Bétuel H, Tossi M, Forest MG, David M, Bertrand J, Miller WL 1989 Rearrangements and point mutations of P450c21 genes are distinguished by five restriction endonuclease haplotypes identified by a new probing strategy in 57 families with congenital adrenal hyperplasia. *J Clin Invest* 83:527–536
  389. Rosenbloom AL, Smith DW 1966 Varying expression for salt-losing in related patients with congenital adrenal hyperplasia. *Pediatrics* 38:215–219
  390. Stoner E, Dimartino-Nardi J, Kuhnle U, Levine LS, Oberfield SE, New MI 1986 Is salt-wasting in congenital adrenal hyperplasia genetic? *Clin Endocrinol (Oxf)* 24:9–20
  391. Morel Y, David M, Forest MG, Bétuel H, Hauptman G, Andre J, Bertrand J, Miller WL 1989 Gene conversions and rearrangements cause discordance between inheritance of forms of 21-hydroxylase deficiency and HLA types. *J Clin Endocrinol Metab* 68:592–599
  392. Sinnott PJ, Dyer PA, Price DA, Harris R, Strachan T 1989 21-Hydroxylase deficiency families with HLA identical affected and unaffected sibs. *J Med Genet* 26:10–17
  393. Gomez-Escobar N, Chou CF, Lin WW, Hsieh SL, Campbell RD 1998 The G11 gene located in the major histocompatibility complex encodes a novel nuclear serine/threonine protein kinase. *J Biol Chem* 273:30954–30960
  394. Law SK, Dodds AW, Porter RR 1984 A comparison of the properties of two classes, C4A and C4B, of the human complement component C4. *EMBO J* 3:1819–1823
  395. Yu CY, Belt KT, Giles CM, Campbell RD, Porter RR 1986 Structural basis of the polymorphism of the human complement components C4A and C4B: gene size, reactivity and antigenicity. *EMBO J* 5:2873–2881
  396. Tee MK, Thomson AA, Bristow J, Miller WL 1995 Sequences promoting the transcription of the human XA gene overlapping P450c21A correctly predict the presence of a novel, adrenal-specific, truncated form of Tenascin-X. *Genomics* 28:171–178
  397. Wijesuriya SD, Zhang G, Dardis A, Miller WL 1999 Transcriptional regulatory elements of the human gene for cytochrome P450c21 (steroid 21-hydroxylase) lie within intron 35 of the linked C4B gene. *J Biol Chem* 274:38097–38106
  398. Morel Y, Bristow J, Gitelman SE, Miller WL 1989 Transcript encoded on the opposite strand of the human steroid 21-hydroxylase/complement component/C4 gene locus. *Proc Natl Acad Sci USA* 86:6582–6586
  399. Bristow J, Tee MK, Gitelman SE, Mellon SH, Miller WL 1993 Tenascin-X: a novel extracellular matrix protein encoded by the human XB gene overlapping P450c21B. *J Cell Biol* 122:265–278
  400. Burch GH, Bedolli MA, McDonough S, Rosenthal SM, Bristow J 1995 Embryonic expression of tenascin-X suggests a role in limb, muscle, and heart development. *Dev Dyn* 203:491–504
  401. Speek M, Barry F, Miller WL 1996 Alternate promoters and alternate splicing of human Tenascin-X, a gene with 5' and 3' ends buried in other genes. *Hum Mol Genet* 5:1749–1758
  402. Burch GH, Gong Y, Liu W, Dettman RW, Curry CJ, Smith L, Miller WL, Bristow J 1997 Tenascin-X deficiency is associated with Ehlers-Danlos syndrome. *Nat Genet* 17:104–108
  403. Eleftheriou F, Exposito JY, Garrone R, Lethias C 1997 Characterization of the bovine Tenascin-X. *J Biol Chem* 272:22866–22874
  404. Lethias C, Carisey A, Comte J, Cluzel C, Exposito JY 2006 A model of tenascin-X integration within the collagenous network. *FEBS Lett* 580:6281–6285
  405. Schalkwijk J, Zweers MC, Steijlen PM, Dean WB, Taylor G, van Vlijmen IM, van Haren B, Miller WL, Bristow J 2001 A recessive form of the Ehlers-Danlos syndrome caused by tenascin-X deficiency. *N Engl J Med* 345:1167–1175
  406. Tee MK, Babalola GO, Aza-Blanc P, Speek M, Gitelman SE, Miller WL 1995 A promoter within intron 35 of the human C4A gene initiates adrenal-specific transcription of a 1 kb RNA: location of a cryptic CYP21 promoter element? *Hum Mol Genet* 4:2109–2116

407. New MI, Wilson RC 1999 Steroid disorders in children: congenital adrenal hyperplasia and apparent mineralocorticoid excess. *Proc Natl Acad Sci USA* 96:12790–12797
408. Clayton PE, Miller WL, Oberfield SE, Ritzén EM, Sippell WG, Speiser PW 2002 Consensus statement on 21-hydroxylase deficiency from The Lawson Wilkins Pediatric Endocrine Society and The European Society for Paediatric Endocrinology. *J Clin Endocrinol Metab* 87:4048–4053
409. Merke DP, Bornstein SR 2005 Congenital adrenal hyperplasia. *Lancet* 365:2125–2136
410. Speiser PW, Azziz R, Baskin LS, Ghizzoni L, Hensle TW, Merke DP, Meyer-Bahlburg HFL, Miller WL, Montori VM, Oberfield SE, Ritzén M, White PC 2010 Congenital adrenal hyperplasia due to steroid 21-hydroxylase deficiency: an Endocrine Society clinical practice guideline. *J Clin Endocrinol Metab* 95:4133–4160
411. Wurtman RJ, Pohorecky LA 1971 Adrenocortical control of epinephrine synthesis in health and disease. *Adv Metab Disord* 5:53–76
412. Merke DP, Chrousos GP, Eisenhofer G, Weise M, Keil MF, Rogol AD, Van Wyk JJ, Bornstein SR 2000 Adrenomedullary dysplasia and hypofunction in patients with classic 21-hydroxylase deficiency. *N Engl J Med* 343:1362–1368
413. Speiser PW, Knochauer ES, Dewailly D, Fruzzetti F, Marcondes JA, Azziz R 2000 A multicenter study of women with nonclassical congenital adrenal hyperplasia: relationship between genotype and phenotype. *Mol Genet Metab* 71:527–534
414. Migeon CJ, Rosenwaks Z, Lee PA, Urban MD, Bias WB 1980 The attenuated form of congenital adrenal hyperplasia as an allelic form of 21-hydroxylase deficiency. *J Clin Endocrinol Metab* 51:647–649
415. Levine LS, Dupont B, Lorenzen F, Pang S, Pollack M, Oberfield SE, Kohn B, Lerner A, Cacciari E, Mantero F, Cassio A, Scaroni C, Chiumello G, Rondanini GF, Gargantini L, Giovannelli G, Virdis R, Bartolotta E, Migliori C, Pintor C, Tato L, Barboni F, New MI 1981 Genetic and hormonal characterization of the cryptic 21-hydroxylase deficiency. *J Clin Endocrinol Metab* 53:1193–1198
416. Chrousos GP, Loriaux DL, Mann DL, Cutler Jr GB 1982 Late-onset 21-hydroxylase deficiency mimicking idiopathic hirsutism or polycystic ovarian disease: an allelic variant of congenital virilizing adrenal hyperplasia with a milder enzymatic defect. *Ann Intern Med* 96:143–148
417. Kohn B, Levine LS, Pollack MS, Pang S, Lorenzen F, Levy D, Lerner AJ, Rondanini GF, Dupont B, New MI 1982 Late-onset steroid 21-hydroxylase deficiency: a variant of classical congenital adrenal hyperplasia. *J Clin Endocrinol Metab* 55:817–827
418. Fiet J, Gueux B, Raux-DeMay MC, Kuttann F, Vexiau P, Brerault JL, Couillin P, Galons H, Villette JM, Julien R 1989 Increased plasma 21-deoxycorticosterone (21-DB) levels in late-onset adrenal 21-hydroxylase deficiency suggest a mild defect of the mineralocorticoid pathway. *J Clin Endocrinol Metab* 68:542–547
419. Pang SY, Wallace MA, Hofman L, Thuline HC, Dorche C, Lyon IC, Dobbins RH, Kling S, Fujieda K, Suwa S 1988 Worldwide experience in newborn screening for classical congenital adrenal hyperplasia due to 21-hydroxylase deficiency. *Pediatrics* 81:866–874
420. Therrell Jr BL, Berenbaum SA, Manter-Kapanke V, Simmank J, Korman K, Prentice L, Gonzalez J, Gunn S 1998 Results of screening 1.9 million Texas newborns for 21-hydroxylase-deficient congenital adrenal hyperplasia. *Pediatrics* 101:583–590
421. Speiser PW, Dupont B, Rubinstein P, Piazza A, Kastelan A, New MI 1985 High frequency of nonclassical steroid 21-hydroxylase deficiency. *Am J Hum Genet* 37:650–667
422. Sherman SL, Aston CE, Morton NE, Speiser PW, New MI 1988 A segregation and linkage study of classical and nonclassical 21-hydroxylase deficiency. *Am J Hum Genet* 42:830–838
423. Dumić M, Brkljačić L, Speiser PW, Wood E, Crawford C, Plavsić V, Banicević M, Radmanović S, Radica A, Kastelan A 1990 An update on the frequency of nonclassical deficiency of adrenal 21-hydroxylase in the Yugoslav population. *Acta Endocrinol* 122:703–710
424. Chetkowski RJ, DeFazio J, Shamonki I, Judd HL, Chang RJ 1984 The incidence of the late-onset congenital adrenal hyperplasia due to 21-hydroxylase deficiency among hirsute women. *J Clin Endocrinol Metab* 58:595–598
425. Kuttann F, Couillin P, Girard F, Billaud L, Vincens M, Boucekkin C, Thalabard JC, Maudelonde T, Spritzer P, Mowszowicz I, Boué A, Mauvais-Jarvis P 1985 Late-onset adrenal hyperplasia in hirsutism. *N Engl J Med* 313:224–231
426. White PC, Tusie-Luna MT, New MI, Speiser PW 1994 Mutations in steroid 21-hydroxylase (CYP21). *Hum Mutat* 3:373–378
427. Matteson KJ, Phillips 3rd JA, Miller WL, Chung BC, Orlando PJ, Frisch H, Ferrandez A, Burr IM 1987 P450XXI (steroid 21-hydroxylase) gene deletions are not found in family studies of congenital adrenal hyperplasia. *Proc Natl Acad Sci USA* 84:5858–5862
428. Baltimore D 1981 Gene conversion: some implications for immunoglobulin genes. *Cell* 24:592–594
429. White PC, Vitek A, Dupont B, New MI 1988 Characterization of frequent deletions causing steroid 21-hydroxylase deficiency. *Proc Natl Acad Sci USA* 85:4436–4440
430. Higashi Y, Tanaka A, Inoue H, Hiromasa T, Fujii-Kuriyama Y 1988 Aberrant splicing and missense mutation cause steroid 21-hydroxylase [P-450(C21)] deficiency in humans: possible gene conversion products. *Proc Natl Acad Sci USA* 85:7486–7490
431. Tardy V, Menassa R, Sulmont V, Lienhardt-Roussie A, Lecointre C, Brauner R, David M, Morel Y 2010 Phenotype-genotype correlations of 13 rare CYP21A2 mutations detected in 46 patients affected with 21-hydroxylase deficiency and in one carrier. *J Clin Endocrinol Metab* 95:1288–1300
432. Mornet E, Crété P, Kuttann F, Raux-DeMay MC, Boué J, White PC, Boué A 1991 Distribution of deletions and seven point mutations on CYP21B genes in three clinical forms of steroid 21-hydroxylase deficiency. *Am J Hum Genet* 48:79–88
433. Donohoue PA, Sandrini Neto R, Collins MM, Migeon CJ 1990 Exon 7 Nco I restriction site within CYP21B (steroid 21-hydroxylase) is a normal polymorphism. *Mol Endocrinol* 4:1354–1362
434. Higashi Y, Hiromasa T, Tanaka A, Miki T, Nakura J, Kondo T, Ohura T, Ogawa E, Nakayama K, Fujii-Kuriyama Y 1991 Effects of individual mutations in the P-450(C21) pseudogene on P-450(C21) activity and their



- distribution in patient genomes of congenital steroid 21-hydroxylase deficiency. *J Biochem* 109:638–644
435. Chiou SH, Hu MC, Chung BC 1990 A missense mutation of Ile<sup>172</sup>→Asn or Arg<sup>356</sup>→Trp causes steroid 21-hydroxylase deficiency. *J Biol Chem* 265:3549–3552
  436. Wedell A, Ritzén EM, Haglund-Stengler B, Luthman H 1992 Steroid 21-hydroxylase deficiency: three additional mutated alleles and establishment of phenotype-genotype relationships of common mutations. *Proc Natl Acad Sci USA* 89:7232–7236
  437. Wedell A, Luthman H 1993 Steroid 21-hydroxylase (P450c21): a new allele and spread of mutations through the pseudogene. *Hum Genet* 91:236–240
  438. Wedell A, Luthman H 1993 Steroid 21-hydroxylase deficiency: two additional mutations in salt-wasting disease and rapid screening of disease-causing mutations. *Hum Mol Genet* 2:499–504
  439. Bleicken C, Loidi L, Dhir V, Parajes S, Quinteiro C, Dominguez F, Grötzinger J, Sippell WG, Riepe FG, Arlt W, Krone N 2009 Functional characterization of three CYP21A2 sequence variants (p.A265V, p.W302S, p.D322G) employing a yeast co-expression system. *Hum Mutat* 30:E443–E450
  440. Grischuk Y, Rubtsov P, Riepe FG, Grötzinger J, Beljelarskaia S, Prassolov V, Kalintchenko N, Semitcheva T, Peterkova V, Tiulpakov A, Sippell WG, Krone N 2006 Four novel missense mutations in the CYP21A2 gene detected in Russian patients suffering from the classical form of congenital adrenal hyperplasia: identification, functional characterization, and structural analysis. *J Clin Endocrinol Metab* 91:4976–4980
  441. Urabe K, Kimura A, Harada F, Iwanaga T, Sasazuki T 1990 Gene conversion in steroid 21-hydroxylase genes. *Am J Hum Genet* 46:1178–1186
  442. Amor M, Parker KL, Globerman H, New MI, White PC 1988 Mutation in the CYP21B gene (Ile-172-Asn) causes steroid 21-hydroxylase deficiency. *Proc Natl Acad Sci USA* 85:1600–1604
  443. Hu MC, Chung BC 1990 Expression of human 21-hydroxylase (P450c21) in bacterial and mammalian cell—a system to characterize normal and mutant enzymes. *Mol Endocrinol* 4:893–898
  444. Wu DA, Chung BC 1991 Mutations of P450c21 (steroid 21-hydroxylase) at Cys<sup>428</sup>, Val<sup>281</sup>, or Ser<sup>268</sup> result in complete, partial, or no loss of enzymatic activity. *J Clin Invest* 88:519–523
  445. Owerbach D, Sherman L, Ballard AL, Azziz R 1992 Pro453 to Ser mutation in CYP21 is associated with non-classic steroid 21-hydroxylase deficiency. *Mol Endocrinol* 6:1211–1215
  446. Hsu LC, Hu MC, Cheng HC, Lu JC, Chung BC 1993 The N-terminal hydrophobic domain of P450c21 is required for membrane insertion and enzyme stability. *J Biol Chem* 268:14682–14686
  447. White PC, Curnow KM, Pascoe L 1994 Disorders of steroid 11 $\beta$ -hydroxylase isozymes. *Endocr Rev* 15:421–438
  448. Fardella CE, Miller WL 1996 Molecular biology of mineralocorticoid metabolism. *Annu Rev Nutr* 16:443–470
  449. Mornet E, Dupont J, Vitek A, White PC 1989 Characterization of two genes encoding human steroid 11 $\beta$ -hydroxylase (P45011 $\beta$ ). *J Biol Chem* 264:20961–20967
  450. Yanagibashi K, Haniu M, Shively JE, Shen WH, Hall P 1986 The synthesis of aldosterone by the adrenal cortex: two zones (fasciculata and glomerulosa) possess one enzyme for 11-, 18-hydroxylation, and aldehyde synthesis. *J Biol Chem* 261:3556–3562
  451. Morohashi K, Yoshioka H, Gotoh O, Okada Y, Yamamoto K, Miyata T, Sogawa K, Fujii-Kuriyama Y, Omura T 1987 Molecular cloning and nucleotide sequence of DNA of mitochondrial P-450(11) of bovine adrenal cortex. *J Biochem* 102:559–568
  452. Mellon SH, Bair SR, Monis H 1995 P450c11B3 mRNA, transcribed from a third P450c11 gene, is expressed in a tissue-specific, developmentally and hormonally regulated fashion in the rodent adrenal, and encodes a protein with both 11-hydroxylase and 18-hydroxylase activities. *J Biol Chem* 270:1643–1649
  453. Chua SC, Szabo P, Vitek A, Grzeschik KH, John M, White PC 1987 Cloning of cDNA encoding steroid 11 $\beta$ -hydroxylase, P450c11. *Proc Natl Acad Sci USA* 84:7193–7197
  454. Nishimoto K, Nakagawa K, Li D, Kosaka T, Oya M, Mikami S, Shibata H, Itoh H, Mitani F, Yamazaki T, Ogishima T, Suematsu M, Mukai K 2010 Adrenocortical zonation in humans under normal and pathological conditions. *J Clin Endocrinol Metab* 95:2296–2305
  455. Ogishima T, Shibata H, Shimada H, Mitani F, Suzuki H, Saruta T, Ishimura Y 1991 Aldosterone synthase cytochrome P450 expressed in the adrenals of patients with primary aldosteronism. *J Biol Chem* 266:10731–10734
  456. Curnow KM, Tusie-Luna MT, Pascoe L, Natarajan R, Gu JL, Nadler JL, White PC 1991 The product of the CYP11B2 gene is required for aldosterone biosynthesis in the human adrenal cortex. *Mol Endocrinol* 5:1513–1522
  457. Kawamoto T, Mitsuuchi Y, Toda K, Yokoyama Y, Miyahara K, Miura S, Ohnishi T, Ichikawa Y, Nakao K, Imura H, Ulick S, Shizuta Y 1992 Role of steroid 11 $\beta$ -hydroxylase and 18-hydroxylase in the biosynthesis of glucocorticoids and mineralocorticoids in humans. *Proc Natl Acad Sci USA* 89:1458–1462
  458. Mulatero P, Curnow KM, Aupetit-Faisant B, Foekling M, Gomez-Sanchez C, Veglio F, Jeunemaitre X, Corvol P, Pascoe L 1998 Recombinant CYP11B genes encode enzymes that can catalyze conversion of 11-deoxycortisol to cortisol, 18-hydroxycortisol, and 18-oxocortisol. *J Clin Endocrinol Metab* 83:3996–4001
  459. Auchus RJ, Chandler DW, Singeetham S, Chokshi N, Nwariaku FE, Dolmatch BL, Holt SA, Wians Jr FH, Josephs SC, Trimmer CK, Lopera J, Vongpatanasin W, Nesbitt SD, Leonard D, Victor RG 2007 Measurement of 18-hydroxycorticosterone during adrenal vein sampling for primary aldosteronism. *J Clin Endocrinol Metab* 92:2648–2651
  460. Clyne CD, Zhang Y, Slutsker L, Mathis JM, White PC, Rainey WE 1997 Angiotensin II and potassium regulate human CYP11B2 transcription through common cis-elements. *Mol Endocrinol* 11:638–649
  461. Bassett MH, Suzuki T, Sasano H, White PC, Rainey WE 2004 The orphan nuclear receptors NURR1 and NGFIIB regulate adrenal aldosterone production. *Mol Endocrinol* 18:279–290
  462. Bassett MH, White PC, Rainey WE 2004 The regulation of aldosterone synthase expression. *Mol Cell Endocrinol* 217:67–74
  463. White PC, Dupont J, New MI, Leiberman E, Hochberg Z, Rösler A 1991 A mutation in CYP11B1 (Arg 448→His)

- associated with steroid 11 $\beta$ -hydroxylase deficiency in Jews of Moroccan origin. *J Clin Invest* 87:1664–1667
464. Pascoe L, Curnow KM, Slutsker L, Rösler A, White PC 1992 Mutations in the human CYP11B2 (aldosterone synthase) gene causing corticosterone methyloxidase II deficiency. *Proc Natl Acad Sci USA* 89:4996–5000
  465. Ulick S, Wang JZ, Morton DH 1992 The biochemical phenotypes of two inborn errors in the biosynthesis of aldosterone. *J Clin Endocrinol Metab* 74:1415–1420
  466. Zhang G, Rodriguez H, Fardella CE, Harris DA, Miller WL 1995 Mutation T318M in P450c11AS causes corticosterone methyl oxidase II deficiency. *Am J Hum Genet* 57:1037–1043
  467. Ulick S 1976 Diagnosis and nomenclature of the disorders of the terminal portion of aldosterone biosynthetic pathway. *J Clin Endocrinol Metab* 43:92–96
  468. Veldhuis JD, Kulin HE, Santen RJ, Wilson TE, Melby JC 1980 Inborn error in the terminal step of aldosterone biosynthesis: corticosterone methyl oxidase type II deficiency in a North American pedigree. *N Engl J Med* 303:117–121
  469. Chabraoui L, Abid F, Menassa R, Gaouzi A, El Hessni A, Morel Y 2010 Three novel CYP11B1 mutations in congenital adrenal hyperplasia due to steroid 11 $\beta$ -hydroxylase deficiency in a Moroccan population. *Horm Res Paediatr* 74:182–189
  470. Zachmann M, Tassinari D, Prader A 1983 Clinical and biochemical variability in congenital adrenal hyperplasia due to 11 $\beta$ -hydroxylase deficiency. *J Clin Endocrinol Metab* 56:222–229
  471. Holcombe JH, Keenan BS, Nichols BL, Kirkland RT, Clayton GW 1980 Neonatal salt loss in the hypertensive form of congenital adrenal hyperplasia. *Pediatrics* 65:777–781
  472. New MI, White P, Pang S, Dupont B, Speiser PW 1989 The adrenal hyperplasias. In: Scriver C, Beaudet A, Sly S, Valle D, eds. *The metabolic basis of inherited disease*. 6th ed. New York: McGraw-Hill Inc.; 1881–1917
  473. Peter M, Janzen N, Sander S, Korsch E, Riepe FG, Sander J 2008 A case of 11 $\beta$ -hydroxylase deficiency detected in a newborn screening program by second-tier LC-MS/MS. *Horm Res* 69:253–256
  474. Krone N, Gröttinger J, Holterhus PM, Sippell WG, Schwarz HP, Riepe FG 2009 Congenital adrenal hyperplasia due to 11-hydroxylase deficiency—insights from two novel CYP11B1 mutations (p.M92X, p.R453Q). *Horm Res* 72:281–286
  475. Sonino N, Levine LS, Vecsei P, New MI 1980 Parallelism of 11- and 18-hydroxylation demonstrated by urinary free hormones in man. *J Clin Endocrinol Metab* 51:557–560
  476. Parajes S, Loidi L, Reisch N, Dhir V, Rose IT, Hampel R, Quinkler M, Conway GS, Castro-Feijóo L, Araujo-Vilar D, Pombo M, Dominguez F, Williams EL, Cole TR, Kirk JM, Kaminsky E, Rumsby G, Arlt W, Krone N 2010 Functional consequences of seven novel mutations in the CYP11B1 gene: four mutations associated with nonclassic and three mutations causing classic 11 $\beta$ -hydroxylase deficiency. *J Clin Endocrinol Metab* 95:779–788
  477. Kharrat M, Trabelsi S, Chaabouni M, Maazoul F, Kraoua L, Ben Jemaa L, Gandoura N, Barsaoui S, Morel Y, M'rad R, Chaabouni H 2010 Only two mutations detected in 15 Tunisian patients with 11 $\beta$ -hydroxylase deficiency: the p.Q356X and the novel p.G379V. *Clin Genet* 78:398–401
  478. Azziz R, Boots LR, Parker Jr CR, Bradley Jr E, Zacur HA 1991 11 $\beta$ -Hydroxylase deficiency in hyperandrogenism. *Fertil Steril* 55:733–741
  479. Joehrer K, Geley S, Strasser-Wozak EM, Azziz R, Wollmann HA, Schmitt K, Kofler R, White PC 1997 CYP11B1 mutations causing non-classic adrenal hyperplasia due to 11 $\beta$ -hydroxylase deficiency. *Hum Mol Genet* 6:1829–1834
  480. Kayes-Wandover KM, Schindler RE, Taylor HC, White PC 2001 Type 1 aldosterone synthase deficiency presenting in a middle-aged man. *J Clin Endocrinol Metab* 86:1008–1012
  481. Martinerie L, Viengchareun S, Delezoide AL, Jaubert F, Sinico M, Prevot S, Boileau P, Meduri G, Lombès M 2009 Low renal mineralocorticoid receptor expression at birth contributes to partial aldosterone resistance in neonates. *Endocrinology* 150:4414–4424
  482. Rösler A 1984 The natural history of salt-wasting disorders of adrenal and renal origin. *J Clin Endocrinol Metab* 59:689–700
  483. Mitsuchi Y, Kawamoto T, Miyahara K, Ulick S, Morton DH, Naiki Y, Kuribayashi I, Toda K, Hara T, Oritani T, Yasuda K, Miura K, Yamamoto Y, Imura H, Shiruta Y 1993 Congenitally defective aldosterone biosynthesis in the humans: inactivation of the P-450c18 gene (CYP11B2) due to nucleotide deletion in CMO I deficient patients. *Biochem Biophys Res Commun* 190:864–869
  484. Peter M, Fawaz L, Drop SL, Visser HK, Sippell WG 1997 Hereditary defect in biosynthesis of aldosterone: aldosterone synthase deficiency 1964–1997. *J Clin Endocrinol Metab* 82:3525–3528
  485. Geley S, Joehrer K, Peter M, Denner K, Bernhardt R, Sippell WG, Kofler R 1995 Amino acid substitution R384P in aldosterone synthase causes corticosterone methyloxidase type I deficiency. *J Clin Endocrinol Metab* 80:424–429
  486. Raag R, Martinis SA, Sligar SG, Poulos TL 1991 Crystal structure of the cytochrome P-450CAM active site mutant Thr252Ala. *Biochemistry* 30:11420–11429
  487. Portrait-Doyen S, Tourniaire J, Richard O, Mulatero P, Aupetit-Faisant B, Curnow KM, Pascoe L, Morel Y 1998 Isolated aldosterone synthase deficiency caused by simultaneous E198D and V386A mutations in the CYP11B2 gene. *J Clin Endocrinol Metab* 83:4156–4161
  488. Fardella CE, Rodriguez H, Montero J, Zhang G, Vignolo P, Rojas A, Villarroel L, Miller WL 1996 Genetic variation in P450c11AS in Chilean patients with low renin hypertension. *J Clin Endocrinol Metab* 81:4347–4351
  489. Fardella CE, Hum DW, Rodriguez H, Zhang G, Barry FL, Ilicki A, Bloch CA, Miller WL 1996 Gene conversion in the CYP11B2 gene encoding aldosterone synthase (P450c11AS) is associated with, but does not cause, the syndrome of corticosterone methyl oxidase II deficiency. *J Clin Endocrinol Metab* 81:321–326
  490. Lifton RP, Dluhy RG, Powers M, Rich GM, Cook S, Ulick S, Lalouel JM 1992 A chimaeric 11 $\beta$ -hydroxylase/aldosterone synthase gene causes glucocorticoid-remediable aldosteronism and human hypertension. *Nature* 355:262–265
  491. Pascoe L, Curnow KM, Slutsker L, Connell JM, Speiser PW, New MI, White PC 1992 Glucocorticoid-suppressible hyperaldosteronism results from hybrid genes created by unequal crossover between CYP11B1 and CYP11B2. *Proc Natl Acad Sci USA* 89:8327–8331

492. Dluhy RG, Lifton RP 1999 Glucocorticoid-remediable aldosteronism. *J Clin Endocrinol Metab* 84:4341–4344
493. Portrat S, Mulatero P, Curnow KM, Chaussain JL, Morel Y, Pascoe L 2001 Deletion hybrid genes, due to unequal crossing over between CYP11B1 (11 $\beta$ -hydroxylase) and CYP11B2 (aldosterone synthase) cause steroid 11 $\beta$ -hydroxylase deficiency and congenital adrenal hyperplasia. *J Clin Endocrinol Metab* 86:3197–3201
494. Litchfield WR, New MI, Coolidge C, Lifton RP, Dluhy RG 1997 Evaluation of the dexamethasone suppression test for the diagnosis of glucocorticoid-remediable aldosteronism. *J Clin Endocrinol Metab* 82:3570–3573
495. Fardella CE, Mosso L, Gómez-Sánchez C, Cortés P, Soto J, Gómez L, Pinto M, Huete A, Oestreicher E, Foradori A, Montero J 2000 Primary hyperaldosteronism in essential hypertensives: prevalence, biochemical profile and molecular biology. *J Clin Endocrinol Metab* 85:1863–1867
496. Böttner B, Denner K, Bernhardt R 1998 Conferring aldosterone synthesis to human CYP11B1 by replacing key amino acid residues with CYP11B2-specific ones. *Eur J Biochem* 252:458–466
497. Curnow KM, Mulatero P, Emeric-Blanchouin N, Aupetit-Faisant B, Corvol P, Pascoe L 1997 The amino acid substitutions Ser288Gly and Val320Ala convert the cortisol producing enzyme, CYP11B1, into an aldosterone producing enzyme. *Nat Struct Biol* 4:32–35
498. Fardella CE, Rodriguez H, Hum DW, Mellon SH, Miller WL 1995 Artificial mutations in P450c11AS (aldosterone synthase) can increase enzymatic activity: a model for low-renin hypertension? *J Clin Endocrinol Metab* 80:1040–1043
499. Takeda Y, Furukawa K, Inaba S, Miyamori I, Mabuchi H 1999 Genetic analysis of aldosterone synthase in patients with idiopathic hyperaldosteronism. *J Clin Endocrinol Metab* 84:1633–1637
500. Labrie F, Luu-The V, Lin SX, Labrie C, Simard J, Breton R, Bélanger A 1997 The key role of 17 $\beta$ -hydroxysteroid dehydrogenases in sex steroid biology. *Steroids* 62:148–158
501. Moghrabi N, Andersson S 1998 17 $\beta$ -Hydroxysteroid dehydrogenases: physiological roles in health and disease. *Trends Endocrinol Metab* 9:265–270
502. Peltoketo H, Luu-The V, Simard J, Adamski J 1999 17 $\beta$ -Hydroxysteroid dehydrogenase (HSD)/17-ketosteroid reductase (KSR) family: nomenclature and main characteristics of the 17HSD/KSR enzymes. *J Mol Endocrinol* 23: 1–11
503. Peltoketo H, Isomaa V, Mäentausta O, Vihko R 1988 Complete amino acid sequence of human placental 17 $\beta$ -hydroxysteroid dehydrogenase deduced from cDNA. *FEBS Lett* 239:73–77
504. Gast MJ, Sims HF, Murdock GL, Gast PM, Strauss AW 1989 Isolation and sequencing of a complementary deoxyribonucleic acid clone encoding human placental 17 $\beta$ -estradiol dehydrogenase: identification of the putative co-factor binding site. *Am J Obstet Gynecol* 161:1726–1731
505. Luu-The V, Labrie C, Simard J, Lachance Y, Zhao HF, Couët J, Leblanc G, Labrie F 1990 Structure of two in tandem human 17 $\beta$ -hydroxysteroid dehydrogenase genes. *Mol Endocrinol* 4:268–275
506. Tremblay Y, Ringler GE, Morel Y, Mohandas TK, Labrie F, Strauss 3rd JF, Miller WL 1989 Regulation of the gene for estrogenic 17-ketosteroid reductase lying on chromosome 17cen→q25. *J Biol Chem* 264:20458–20462
507. Luu-The V, Zhang Y, Poirier D, Labrie F 1995 Characteristics of human types 1,2 and 3 17 $\beta$ -hydroxysteroid dehydrogenase activities: oxidation/reduction and inhibition. *J Steroid Biochem Mol Biol* 55:581–587
508. Auchus RJ, Covey DF, Bork V, Schaefer J 1988 Solid-state NMR observation of cysteine and lysine Michael adducts of inactivated estradiol dehydrogenase. *J Biol Chem* 263: 11640–11645
509. Ghosh D, Wawrzak Z, Weeks CM, Duax WL, Erman M 1994 The refined three-dimensional structure of 3 $\alpha$ , 20 $\beta$ -hydroxysteroid dehydrogenase and possible roles of the residues conserved in short-chain dehydrogenases. *Structure* 2:629–640
510. Ghosh D, Pletnev VZ, Zhu DW, Wawrzak Z, Duax WL, Pangborn W, Labrie F, Lin SX 1995 Structure of human estrogenic 17 $\beta$ -hydroxysteroid dehydrogenase at 2.2 Å resolution. *Structure* 3:503–513
511. Sawicki MW, Erman M, Puranen T, Vihko P, Ghosh D 1999 Structure of the ternary complex of human 17 $\beta$ -hydroxysteroid dehydrogenase type 1 with 3-hydroxyestra-1,3,5,7-tetraen-17-one (equilin) and NADP<sup>+</sup>. *Proc Natl Acad Sci USA* 96:840–845
512. Sasano H, Frost AR, Saitoh R, Harada N, Poutanen M, Vihko R, Bulun SE, Silverberg SG, Nagura H 1996 Aromatase and 17 $\beta$ -hydroxysteroid dehydrogenase type 1 in human breast carcinoma. *J Clin Endocrinol Metab* 81:4042–4046
513. Wu L, Einstein M, Geissler WM, Chan HK, Elliston KO, Andersson S 1993 Expression cloning and characterization of human 17 $\beta$ -hydroxysteroid dehydrogenase type 2, a microsomal enzyme possessing 20 $\alpha$ -hydroxysteroid dehydrogenase activity. *J Biol Chem* 268:12964–12969
514. Casey ML, MacDonald PC, Andersson S 1994 17 $\beta$ -Hydroxysteroid dehydrogenase type 2: chromosomal assignment and progesterone regulation of gene expression in human endometrium. *J Clin Invest* 94:2135–2141
515. Takeyama J, Sasano H, Suzuki T, Iinuma K, Nagura H, Andersson S 1998 17 $\beta$ -Hydroxysteroid dehydrogenase types 1 and 2 in human placenta: an immunohistochemical study with correlation to placental development. *J Clin Endocrinol Metab* 83:3710–3715
516. Geissler WM, Davis DL, Wu L, Bradshaw KD, Patel S, Mendonca BB, Elliston KO, Wilson JD, Russell DW, Andersson S 1994 Male pseudohermaphroditism caused by mutations of testicular 17 $\beta$ -hydroxysteroid dehydrogenase 3. *Nat Genet* 7:34–39
517. Andersson S, Geissler WM, Wu L, Davis DL, Grumbach MM, New MI, Schwarz HP, Blethen SL, Mendonca BB, Bloise W, Witchel SF, Cutler Jr GB, Griffin JE, Wilson JD, Russell DW 1996 Molecular genetics and pathophysiology of 17 $\beta$ -hydroxysteroid dehydrogenase 3 deficiency. *J Clin Endocrinol Metab* 81:130–136
518. Moghrabi N, Hughes IA, Dunaif A, Andersson S 1998 Deleterious missense mutations and silent polymorphism in the human 17 $\beta$ -hydroxysteroid dehydrogenase 3 gene (HSD17B3). *J Clin Endocrinol Metab* 83:2855–2860
519. Mendonca BB, Arnhold JJ, Bloise W, Andersson S, Russell DW, Wilson JD 1999 17 $\beta$ -Hydroxysteroid dehydrogenase 3 deficiency in women. *J Clin Endocrinol Metab* 84:802–804



520. Adamski J, Normand T, Leenders F, Monté D, Begue A, Stéhelin D, Jungblut PW, de Launoit Y 1995 Molecular cloning of a novel widely expressed human 80 kDa 17 $\beta$ -hydroxysteroid dehydrogenase IV. *Biochem J* 311:437–443
521. Leenders F, Tesdorpf JG, Markus M, Engel T, Seedorf U, Adamski J 1996 Porcine 80-kDa protein reveals intrinsic 17 $\beta$ -hydroxysteroid dehydrogenase, fatty acyl-CoA-hydrolase/dehydrogenase, and sterol transfer activities. *J Biol Chem* 271:5438–5442
522. van Grunsven EG, van Berkel E, Ijlst L, Vreken P, de Klerk JB, Adamski J, Lemonde H, Clayton PT, Cuebas DA, Wanders RJ 1998 Peroxisomal D-hydroxyacyl-CoA dehydrogenase deficiency: resolution of the enzyme defect and its molecular basis in bifunctional protein deficiency. *Proc Natl Acad Sci USA* 95:2128–2133
523. Qin YM, Poutanen MH, Helander HM, Kvist AP, Siivari KM, Schmitz W, Conzelmann E, Hellman U, Hiltunen JK 1997 Peroxisomal multifunctional enzyme of  $\beta$ -oxidation metabolizing D-3-hydroxyacyl-CoA esters in rat liver: molecular cloning, expression and characterization. *Biochem J* 321:21–28
524. Lin HK, Jez JM, Schlegel BP, Peehl DM, Pachter JA, Penning TM 1997 Expression and characterization of recombinant type 2 3 $\alpha$ -hydroxysteroid dehydrogenase (HSD) from human prostate: demonstration of bifunctional 3 $\alpha$ /17 $\beta$ -HSD activity and cellular distribution. *Mol Endocrinol* 11:1971–1984
525. Deyashiki Y, Ogasawara A, Nakayama T, Nakanishi M, Miyabe Y, Sato K, Hara A 1994 Molecular cloning of two human liver 3 $\alpha$ -hydroxysteroid/dihydrodiol dehydrogenase isoenzymes that are identical with chlordecone reductase and bile-acid binder. *Biochem J* 299:545–552
526. Dufort I, Rheault P, Huang XF, Soucy P, Luu-The V 1999 Characteristics of a highly labile human type 5 17 $\beta$ -hydroxysteroid dehydrogenase. *Endocrinology* 140:568–574
527. El-Alfy M, Luu-The V, Huang XF, Berger L, Labrie F, Pelletier G 1999 Localization of type 5 17 $\beta$ -hydroxysteroid dehydrogenase, 3 $\beta$ -hydroxysteroid dehydrogenase, and androgen receptor in the human prostate by in situ hybridization and immunocytochemistry. *Endocrinology* 140:1481–1491
528. Penning TM, Burczynski ME, Jez JM, Hung CF, Lin HK, Ma H, Moore M, Palackal N, Ratnam K 2000 Human 3 $\alpha$ -hydroxysteroid dehydrogenase isoforms (AKR1C1-AKR1C4) of the aldo-keto reductase superfamily: functional plasticity and tissue distribution reveals roles in the inactivation and formation of male and female sex hormones. *Biochem J* 351:67–77
529. Byrns MC, Steckelbroeck S, Penning TM 2008 An indomethacin analogue, N-(4-chlorobenzoyl)-melatonin, is a selective inhibitor of aldo-keto reductase 1C2 (type 2 3 $\alpha$ -HSD, type 5 17 $\beta$ -HSD, and prostaglandin F synthase), a potential target for the treatment of hormone dependent and hormone independent malignancies. *Biochem Pharmacol* 75:484–493
530. Nakamura Y, Hornsby PJ, Casson P, Morimoto R, Satoh F, Xing Y, Kennedy MR, Sasano H, Rainey WE 2009 Type 5 17 $\beta$ -hydroxysteroid dehydrogenase (AKR1C3) contributes to testosterone production in the adrenal reticularis. *J Clin Endocrinol Metab* 94:2192–2198
531. Chetyrkin SV, Hu J, Gough WH, Dumaual N, Kedishvili NY 2001 Further characterization of human microsomal 3 $\alpha$ -hydroxysteroid dehydrogenase. *Arch Biochem Biophys* 386:1–10
532. Huang XF, Luu-The V 2000 Molecular characterization of a first human 3( $\alpha$ )-hydroxysteroid epimerase. *J Biol Chem* 275:29452–29457
533. Biswas MG, Russell DW 1997 Expression cloning and characterization of oxidative 17 $\beta$ - and 3 $\alpha$ -hydroxysteroid dehydrogenases from rat and human prostate. *J Biol Chem* 272:15959–15966
534. Alkatib AA, Cosma M, Elamin MB, Erickson D, Swiglo BA, Erwin PJ, Montori VM 2009 A systematic review and meta-analysis of randomized placebo-controlled trials of DHEA treatment effects on quality of life in women with adrenal insufficiency. *J Clin Endocrinol Metab* 94:3676–3681
535. Simpson ER, Mahendroo MS, Means GD, Kilgore MW, Hinshelwood MM, Graham-Lorence S, Amarneh B, Ito Y, Fisher CR, Michael MD, Mendelson CR, Bulun SE 1994 Aromatase cytochrome P450, the enzyme responsible for estrogen biosynthesis. *Endocr Rev* 15:342–355
536. Simpson ER, Clyne C, Rubin G, Boon WC, Robertson K, Britt K, Speed C, Jones M 2002 Aromatase—a brief overview. *Annu Rev Physiol* 64:93–127
537. Mahendroo MS, Means GD, Mendelson CR, Simpson ER 1991 Tissue specific expression of human P450 arom: the promoter responsible in adipose tissue is different from that utilized in placenta. *J Biol Chem* 266:11276–11281
538. Mahendroo MS, Mendelson CR, Simpson ER 1993 Tissue-specific and hormonally controlled alternative promoters regulate aromatase cytochrome P450 gene expression in human adipose tissue. *J Biol Chem* 268:19463–19470
539. Shimozawa O, Sakaguchi M, Ogawa H, Harada N, Mihara K, Omura T 1993 Core glycosylation of cytochrome P-450(arom). Evidence for localization of N terminus of microsomal cytochrome P-450 in the lumen. *J Biol Chem* 268:21399–21402
540. Beusen DD, Carrell HL, Covey DF 1987 Metabolism of 19-methyl-substituted steroids by human placental aromatase. *Biochemistry* 26:7833–7841
541. Ghosh D, Griswold J, Erman M, Pangborn W 2009 Structural basis for androgen specificity and oestrogen synthesis in human aromatase. *Nature* 457:219–223
542. Ito Y, Fisher CR, Conte FA, Grumbach MM, Simpson ER 1993 Molecular basis of aromatase deficiency in an adult female with sexual infantilism and polycystic ovaries. *Proc Natl Acad Sci USA* 90:11673–11677
543. Fisher CR, Graves KH, Parlow AF, Simpson ER 1998 Characterization of mice deficient in aromatase (ArKO) because of targeted disruption of the cyp19 gene. *Proc Natl Acad Sci USA* 95:6965–6970
544. Lo JC, Schwitzgebel VM, Tyrrell JB, Fitzgerald PA, Kaplan SL, Conte FA, Grumbach MM 1999 Normal female infants born of mothers with classic congenital adrenal hyperplasia due to 21-hydroxylase deficiency. *J Clin Endocrinol Metab* 84:930–936
545. Morishima A, Grumbach MM, Simpson ER, Fisher C, Qin K 1995 Aromatase deficiency in male and female siblings caused by a novel mutation and the physiological role of estrogens. *J Clin Endocrinol Metab* 80:3689–3698
546. Bruchovsky N, Wilson JD 1968 The intranuclear binding

- of testosterone and 5 $\alpha$ -androstan-17 $\beta$ -ol-3-one by rat prostate. *J Biol Chem* 243:5953–5960
547. **Moore RJ, Wilson JD** 1976 Steroid 5 $\alpha$ -reductase in cultured human fibroblasts. Biochemical and genetic evidence for two distinct enzyme activities. *J Biol Chem* 251:5895–5900
  548. **Jenkins EP, Andersson S, Imperato-McGinley J, Wilson JD, Russell DW** 1992 Genetic and pharmacologic evidence for more than one human steroid 5 $\alpha$ -reductase. *J Clin Invest* 89:293–300
  549. **Andersson S, Berman DM, Jenkins EP, Russell DW** 1991 Deletion of a steroid 5 $\alpha$ -reductase 2 gene in male pseudohermaphroditism. *Nature* 354:159–161
  550. **Thigpen AE, Silver RI, Guileyardo JM, Casey ML, McConnell JD, Russell DW** 1993 Tissue distribution and ontogeny of steroid 5 $\alpha$ -reductase isozyme expression. *J Clin Invest* 92:903–910
  551. **Wilson JD, Griffin JE, Russell DW** 1993 Steroid 5 $\alpha$ -reductase 2 deficiency. *Endocr Rev* 14:577–593
  552. **Wilson JD** 1999 The role of androgens in male gender role behavior. *Endocr Rev* 20:726–737
  553. **Frederiksen DW, Wilson JD** 1971 Partial characterization of the nuclear reduced nicotinamide adenine dinucleotide phosphate:  $\Delta$ 4–3-ketosteroid 5  $\alpha$ -reductase of rat prostate. *J Biol Chem* 246:2584–2593
  554. **McConnell JD, Bruskewitz R, Walsh P, Andriole G, Lieber M, Holtgrewe HL, Albertsen P, Roehrborn CG, Nickel JC, Wang DZ, Taylor AM, Waldstreicher J** 1998 The effect of finasteride on the risk of acute urinary retention and the need for surgical treatment among men with benign prostatic hyperplasia. *N Engl J Med* 338:557–563
  555. **Mahendroo MS, Cala KM, Russell DW** 1996 5 $\alpha$ -reduced androgens play a key role in murine parturition. *Mol Endocrinol* 10:380–392
  556. **Mahendroo M, Wilson JD, Richardson JA, Auchus RJ** 2004 Steroid 5 $\alpha$ -reductase 1 promotes 5 $\alpha$ -androstane-3 $\alpha$ -17 $\beta$ -diol synthesis in immature mouse testis by two pathways. *Mol Cell Endocrinol* 222:113–120
  557. **Khanna M, Qin KN, Wang RW, Cheng KC** 1995 Substrate specificity, gene structure and tissue-specific distribution of multiple human 3 $\alpha$ -hydroxysteroid dehydrogenases. *J Biol Chem* 270:20162–20168
  558. **Nishizawa M, Nakajima T, Yasuda K, Kanzaki H, Sasaguri Y, Watanabe K, Ito S** 2000 Close kinship of human 20 $\alpha$ -hydroxysteroid dehydrogenase gene with three aldo-keto reductase genes. *Genes Cells* 5:111–125
  559. **Rupprecht R, Hauser CA, Trapp T, Holsboer F** 1996 Neurosteroids: molecular mechanisms of action and psychopharmacological significance. *J Steroid Biochem Mol Biol* 56:163–168
  560. **Rizner TL, Lin HK, Peehl DM, Steckelbroeck S, Bauman DR, Penning TM** 2003 Human type 3 3 $\alpha$ -hydroxysteroid dehydrogenase (aldo-keto reductase 1C2) and androgen metabolism in prostate cells. *Endocrinology* 144:2922–2932
  561. **Griffin LD, Mellon SH** 1999 Selective serotonin reuptake inhibitors directly alter activity of neurosteroidogenic enzymes. *Proc Natl Acad Sci USA* 96:13512–13517
  562. **Gulbis JM, Mann S, MacKinnon R** 1999 Structure of a voltage-dependent K<sup>+</sup> channel  $\beta$  subunit. *Cell* 97:943–952
  563. **Hoog SS, Pawlowski JE, Alzari PM, Penning TM, Lewis M** 1994 Three-dimensional structure of rat liver 3 $\alpha$ -hydroxysteroid/dihydrodiol dehydrogenase: a member of the aldo-keto reductase superfamily. *Proc Natl Acad Sci USA* 91:2517–2521
  564. **Cooper WC, Jin Y, Penning TM** 2007 Elucidation of a complete kinetic mechanism for a mammalian hydroxysteroid dehydrogenase (HSD) and identification of all enzyme forms on the reaction coordinate: the example of rat liver 3 $\alpha$ -HSD (AKR1C9). *J Biol Chem* 282:33484–33493
  565. **Ratnam K, Ma H, Penning TM** 1999 The arginine 276 anchor for NADP(H) dictates fluorescence kinetic transients in 3 $\alpha$ -hydroxysteroid dehydrogenase, a representative aldo-keto reductase. *Biochemistry* 38:7856–7864
  566. **Napoli JL** 2001 17 $\beta$ -Hydroxysteroid dehydrogenase type 9 and other short-chain dehydrogenases/reductases that catalyze retinoid, 17 $\beta$ - and 3 $\alpha$ -hydroxysteroid metabolism. *Mol Cell Endocrinol* 171:103–109
  567. **Chetyrkin SV, Hu J, Gough WH, Dumaual N, Kedishvili NY** 2001 Further characterization of human microsomal 3 $\alpha$ -hydroxysteroid dehydrogenase. *Arch Biochem Biophys* 386:1–10
  568. **Arriza JL, Weinberger C, Cerelli G, Glaser TM, Handelin BL, Housman DE, Evans RM** 1987 Cloning of human mineralocorticoid receptor DNA: structural and functional kinship with the glucocorticoid receptor. *Science* 237:268–275
  569. **Funder JW, Pearce PT, Smith R, Smith AI** 1988 Mineralocorticoid action: target tissue specificity is enzyme, not receptor, mediated. *Science* 242:583–585
  570. **White PC, Mune T, Agarwal AK** 1997 11 $\beta$ -Hydroxysteroid dehydrogenase and the syndrome of apparent mineralocorticoid excess. *Endocr Rev* 18:135–156
  571. **Seckl JR, Morton NM, Chapman KE, Walker BR** 2004 Glucocorticoids and 11 $\beta$ -hydroxysteroid dehydrogenase in adipose tissue. *Rec Prog Horm Res* 59:359–393
  572. **Walker EA, Stewart PM** 2003 11 $\beta$ -Hydroxysteroid dehydrogenase: unexpected connections. *Trends Endocrinol Metab* 14:334–339
  573. **Tannin GM, Agarwal AK, Monder C, New MI, White PC** 1991 The human gene for 11 $\beta$ -hydroxysteroid dehydrogenase. Structure, tissue distribution, and chromosomal localization. *J Biol Chem* 266:16653–16658
  574. **Agarwal AK, Monder C, Eckstein B, White PC** 1989 Cloning and expression of rat cDNA encoding corticosteroid 11 $\beta$ -dehydrogenase. *J Biol Chem* 264:18939–18943
  575. **Moore CC, Mellon SH, Murai J, Siiteri PK, Miller WL** 1993 Structure and function of the hepatic form of 11 $\beta$ -hydroxysteroid dehydrogenase in the squirrel monkey, an animal model of glucocorticoid resistance. *Endocrinology* 133:368–375
  576. **Agarwal AK, Tusie-Luna MT, Monder C, White PC** 1990 Expression of 11 $\beta$ -hydroxysteroid dehydrogenase using recombinant vaccinia virus. *Mol Endocrinol* 4:1827–1832
  577. **Walker EA, Clark AM, Hewison M, Ride JP, Stewart PM** 2001 Functional expression, characterization, and purification of the catalytic domain of human 11 $\beta$ -hydroxysteroid dehydrogenase type 1. *J Biol Chem* 276:21343–21350
  578. **Odermatt A, Arnold P, Stauffer A, Frey BM, Frey FJ** 1999 The N-terminal anchor sequences of 11 $\beta$ -hydroxysteroid dehydrogenases determine their orientation in the endoplasmic reticulum membrane. *J Biol Chem* 274:28762–28770
  579. **Bujalska IJ, Draper N, Michailidou Z, Tomlinson JW,**

- White PC, Chapman KE, Walker EA, Stewart PM 2005 Hexose-6-phosphate dehydrogenase confers oxo-reductase activity upon 11 $\beta$ -hydroxysteroid dehydrogenase type 1. *J Mol Endocrinol* 34:675–684
580. Albiston AL, Obeyesekere VR, Smith RE, Krozowski ZS 1994 Cloning and tissue distribution of the human 11 $\beta$ -hydroxysteroid dehydrogenase type II enzyme. *Mol Cell Endocrinol* 105:R11–R17
581. Brown RW, Chapman KE, Edwards CR, Seckl JR 1993 Human placental 11  $\beta$ -hydroxysteroid dehydrogenase: evidence for and partial purification of a distinct NAD<sup>+</sup>-dependent isoform. *Endocrinology* 132:2614–2621
582. Rusvai E, N  ray-Fejes-T  th A 1993 A new isoform of 11 $\beta$ -hydroxysteroid dehydrogenase in aldosterone target cells. *J Biol Chem* 268:10717–10720
583. Krozowski Z, McGuire JA, Stein-Oakley AN, Dowling J, Smith RE, Andrews RK 1995 Immunohistochemical localization of the 11  $\beta$ -hydroxysteroid dehydrogenase type II enzyme in human kidney and placenta. *J Clin Endocrinol Metab* 80:2203–2209
584. Hirasawa G, Sasano H, Suzuki T, Takeyama J, Muramatsu Y, Fukushima K, Hiwatashi N, Toyota T, Nagura H, Krozowski ZS 1999 11 $\beta$ -hydroxysteroid dehydrogenase type 2 and mineralocorticoid receptor in human fetal development. *J Clin Endocrinol Metab* 84:1453–1458
585. Hewitt KN, Walker EA, Stewart PM 2005 Hexose-6-phosphate dehydrogenase and redox control of 11 $\beta$ -hydroxysteroid dehydrogenase type 1 activity. *Endocrinology* 146:2539–2543
586. McCormick KL, Wang X, Mick GJ 2006 Evidence that the 11 $\beta$ -hydroxysteroid dehydrogenase (11 $\beta$ HSD-1) is regulated by pentose pathway flux. *J Biol Chem* 281:341–347
587. Tomlinson JW, Walker EA, Bujalska IJ, Draper N, Lavery GG, Cooper MS, Hewison M, Stewart PM 2004 11 $\beta$ -Hydroxysteroid dehydrogenase type 1: a tissue specific regulator of glucocorticoid response. *Endocr Rev* 25:831–866
588. Mune T, Rogerson FM, Nikkil   H, Agarwal AK, White PC 1995 Human hypertension caused by mutations in the kidney isozyme of 11  $\beta$ -hydroxysteroid dehydrogenase. *Nat Genet* 10:394–399
589. Li KX, Obeyesekere VR, Krozowski ZS, Ferrari P 1997 Oxoreductase and dehydrogenase activities of the human and rat 11 $\beta$ -hydroxysteroid dehydrogenase type 2 enzyme. *Endocrinology* 138:2948–2952
590. Draper N, Walker EA, Bujalska IJ, Tomlinson JW, Chalder SM, Arlt W, Lavery GG, Bedendo O, Ray DW, Laing I, Malunowicz E, White PC, Hewison M, Mason PJ, Connell JM, Shackleton CH, Stewart PM 2003 Mutations in the genes encoding 11 $\beta$ -hydroxysteroid dehydrogenase type 1 and hexose-6-phosphate dehydrogenase interact to cause cortisone reductase deficiency. *Nat Genet* 34:434–439
591. San Mill  n JL, Botella-Carretero JI, Alvarez-Blasco F, Luque-Ram  rez M, Sancho J, Moghetti P, Escobar-Morreale HF 2005 A study of the hexose-6-phosphate dehydrogenase gene R453Q and 11 $\beta$ -hydroxysteroid dehydrogenase type 1 gene 83557insA polymorphisms in the polycystic ovary syndrome. *J Clin Endocrinol Metab* 90:4157–4162
592. White PC 2005 Genotypes at 11 $\beta$ -hydroxysteroid dehydrogenase type IIB1 and hexose-6-phosphate dehydrogenase loci are not risk factors for apparent cortisone reductase deficiency in a large population-based sample. *J Clin Endocrinol Metab* 90:5880–5883
593. Gambineri A, Vicennati V, Genghini S, Tomassoni F, Pagotto U, Pasquali R, Walker BR 2006 Genetic variation in 11 $\beta$ -hydroxysteroid dehydrogenase type 1 predicts adrenal hyperandrogenism among lean women with polycystic ovary syndrome. *J Clin Endocrinol Metab* 91:2295–2302
594. Lavery GG, Walker EA, Tiganescu A, Ride JP, Shackleton CH, Tomlinson JW, Connell JM, Ray DW, Biason-Lauber A, Malunowicz EM, Arlt W, Stewart PM 2008 Steroid biomarkers and genetic studies reveal inactivating mutations in hexose-6-phosphate dehydrogenase in patients with cortisone reductase deficiency. *J Clin Endocrinol Metab* 93:3827–3832
595. Lavery GG, Walker EA, Draper N, Jeyasuria P, Marcos J, Shackleton CH, Parker KL, White PC, Stewart PM 2006 Hexose-6-phosphate dehydrogenase knock-out mice lack 11 $\beta$ -hydroxysteroid dehydrogenase type 1-mediated glucocorticoid generation. *J Biol Chem* 281:6546–6551
596. Dave-Sharma S, Wilson RC, Harbison MD, Newfield R, Azar MR, Krozowski ZS, Funder JW, Shackleton CH, Bradlow HL, Wei JQ, Hertecant J, Moran A, Neiberger RE, Balfe JW, Fattah A, Daneman D, Akkurt HI, De Santis C, New MI 1998 Examination of genotype and phenotype relationships in 14 patients with apparent mineralocorticoid excess. *J Clin Endocrinol Metab* 83:2244–2254
597. Wilson RC, Nimkarn S, New MI 2001 Apparent mineralocorticoid excess. *Trends Endocrinol Metab* 12:104–111
598. Quinkler M, Stewart PM 2003 Hypertension and the cortisol-cortisone shuttle. *J Clin Endocrinol Metab* 88:2384–2392
599. Palermo M, Quinkler M, Stewart PM 2004 Apparent mineralocorticoid excess syndrome: an overview. *Arq Bras Endocrinol Metabol* 48:687–696
600. Falany CN 1997 Enzymology of human cytosolic sulfotransferases. *FASEB J* 11:206–216
601. Strott CA 2002 Sulfonation and molecular action. *Endocr Rev* 23:703–732
602. Tong MH, Jiang H, Liu P, Lawson JA, Brass LF, Song WC 2005 Spontaneous fetal loss caused by placental thrombosis in estrogen sulfotransferase-deficient mice. *Nat Med* 11:153–159
603. Nowell S, Falany CN 2006 Pharmacogenetics of human cytosolic sulfotransferases. *Oncogene* 25:1673–1678
604. Yen PH, Allen E, Marsh B, Mohandas T, Wang N, Taggart RT, Shapiro LJ 1987 Cloning and expression of steroid sulfatase cDNA and the frequent occurrence of deletions: implications for X-Y interchange. *Cell* 49:443–454
605. Ballabio A, Shapiro LJ 1995 Steroid sulfatase deficiency and X-linked ichthiosis. In: Schriver C, Beaudet A, Sly W, Valle D, eds. *The metabolic and molecular basis of inherited disease*. New York: McGraw-Hill; 2999–3022
606. Compagnone NA, Bulfone A, Rubenstein JL, Mellon SH 1995 Expression of the steroidogenic enzyme P450scc in the central and peripheral nervous systems during rodent embryogenesis. *Endocrinology* 136:2689–2696
607. Compagnone NA, Mellon SH 1998 Dehydroepiandrosterone: a potential signalling molecule for neocortical organization during development. *Proc Natl Acad Sci USA* 95:4678–4683



608. Strott CA 2002 Sulfonation and molecular action. *Endocr Rev* 23:703–732
609. Noordam C, Dhir V, McNelis JC, Schlereth F, Hanley NA, Krone N, Smeitink JA, Smeets R, Sweep FC, Claahsen-van der Grinten HL, Arlt W 2009 Inactivating PAPSS2 mutations in a patient with premature pubarche. *N Engl J Med* 360:2310–2318
610. Thiele H, Sakano M, Kitagawa H, Sugahara K, Rajab A, Höhne W, Ritter H, Leschik G, Nürnberg P, Mundlos S 2004 Loss of chondroitin 6-O-sulfotransferase-1 function results in severe human chondrodysplasia with progressive spinal involvement. *Proc Natl Acad Sci USA* 101:10155–10160
611. Zanaria E, Muscatelli F, Bardoni B, Strom TM, Guioli S, Guo W, Lalli E, Moser C, Walker AP, McCabe ERB, Meitinger T, Monaco AP, Sassone-Corsi P, Camerino G 1994 An unusual member of the nuclear hormone receptor superfamily responsible for X-linked adrenal hypoplasia congenita. *Nature* 372:635–641
612. Phelan JK, McCabe ER 2001 Mutations in NR0B1 (DAX1) and NR5A (SF1) responsible for adrenal hypoplasia congenita. *Hum Mutat* 18:472–487
613. Lin L, Gu WX, Ozisik G, To WS, Owen CJ, Jameson JL, Achermann JC 2006 Analysis of DAX1 (*NR0B1*) and steroidogenic factor-1 (SF1/*Ad4BP*, *NR5A1*) in children and adults with primary adrenal failure: ten years' experience. *J Clin Endocrinol Metab* 91:3048–3054
614. Tabarin A, Achermann JC, Recan D, Bex V, Bertagna X, Christin-Maitre S, Ito M, Jameson JL, Bouchard P 2000 A novel mutation in DAX1 causes delayed-onset adrenal insufficiency and incomplete hypogonadotropic hypogonadism. *J Clin Invest* 105:321–328
615. Achermann JC, Ito M, Ito M, Hindmarsh PC, Jameson JL 1999 A mutation in the gene encoding steroidogenic factor-1 causes XY sex reversal and adrenal failure in humans. *Nat Genet* 22:125–126
616. Biason-Lauber A, Schoenle EJ 2000 Apparently normal ovarian differentiation in a prepubertal girl with transcriptionally inactive steroidogenic factor 1 (*NR5A1/SF-1*) and adrenocortical insufficiency. *Am J Hum Genet* 67:1563–1568
617. Achermann JC, Ozisik G, Ito M, Orun UA, Harmanci K, Gurakan B, Jameson JL 2002 Gonadal determination and adrenal development are regulated by the orphan nuclear receptor steroidogenic factor-1, in a dose-dependent manner. *J Clin Endocrinol Metab* 87:1829–1833
618. Else T, Hammer GD 2005 Analysis of absence: adrenal agenesis, aplasia and atrophy. *Trends Endocrinol Metab* 16:458–468
619. Vilain E, Le Merrer M, Lecointre C, Desangles F, Kay MA, Maroteaux P, McCabe ER 1999 IMAGe, a new clinical association of intrauterine growth retardation, metaphyseal dysplasia, adrenal hypoplasia congenita, and genital anomalies. *J Clin Endocrinol Metab* 84:4335–4340
620. Bergadá I, Del Rey G, Lapunzina P, Bergadá C, Fellous M, Copelli S 2005 Familial occurrence of the IMAGe association: additional clinical variants and a proposed mode of inheritance. *J Clin Endocrinol Metab* 90:3186–3190
621. Lin L, Hindmarsh PC, Metherell LA, Alzyoud M, Al-Ali M, Brain CE, Clark AJ, Dattani MT, Achermann JC 2007 Severe loss-of-function mutations in the adrenocorticotropin receptor (*ACTHR*, *MC2R*) can be found in patients with apparent mineralocorticoid insufficiency. *Clin Endocrinol (Oxf)* 66:205–210
622. Clark AJ, Weber A 1998 Adrenocorticotropin insensitivity syndromes. *Endocr Rev* 19:828–843
623. Flück CE, Martens JW, Conte FA, Miller WL 2002 Clinical, genetic and functional characterization of ACTH receptor mutations using a novel receptor assay. *J Clin Endocrinol Metab* 87:4318–4323
624. Elias LL, Huebner A, Metherell LA, Canas A, Warne GL, Bitti ML, Cianfarani S, Clayton PE, Savage MO, Clark AJ 2000 Tall stature in familial glucocorticoid deficiency. *Clin Endocrinol (Oxf)* 53:423–430
625. Metherell LA, Chapple JP, Cooray S, David A, Becker C, Rüschemdorf F, Naville D, Begeot M, Khoo B, Nürnberg P, Huebner A, Cheetham ME, Clark AJ 2005 Mutations in MRAP, encoding a new interacting partner of the ACTH receptor, cause familial glucocorticoid deficiency type 2. *Nat Genet* 37:166–170
626. Webb TR, Clark AJL 2010 Minireview: the melanocortin 2 receptor accessory proteins. *Mol Endocrinol* 24:475–484
627. Allgrove J, Clayden GS, Grant DB, Macaulay JC 1978 Familial glucocorticoid deficiency with achalasia of the cardia and deficient tear production. *Lancet* 1:1284–1286
628. Grant DB, Barnes ND, Dumic M, Ginalska-Malinowska M, Milla PJ, von Petrykowski W, Rowlatt RJ, Steendijk R, Wales JH, Werder E 1993 Neurological and adrenal dysfunction in the adrenal insufficiency/alacrima/achalasia (3A) syndrome. *Arch Dis Child* 68:779–782
629. Houlden H, Smith S, De Carvalho M, Blake J, Mathias C, Wood NW, Reilly MM 2002 Clinical and genetic characterization of families with triple A (Allgrove) syndrome. *Brain* 125:2681–2690
630. Tullio-Pelet A, Salomon R, Hadj-Rabia S, Mugnier C, de Laet MH, Chaouachi B, Bakiri F, Brottier P, Cattolico L, Penet C, Bégeot M, Naville D, Nicolino M, Chaussain JL, Weissenbach J, Munnich A, Lyonnet S 2000 Mutant WD-repeat protein in triple-A syndrome. *Nat Genet* 26:332–335
631. Handschug K, Sperling S, Yoon SJ, Hennig S, Clark AJ, Huebner A 2001 Triple A syndrome is caused by mutations in *AAAS*, a new WD-repeat protein gene. *Hum Mol Genet* 10:283–290
632. Cronshaw JM, Matunis MJ 2003 The nuclear pore complex protein ALADIN is mislocalized in triple A syndrome. *Proc Natl Acad Sci USA* 100:5823–5827
633. Storr HL, Kind B, Parfitt DA, Chapple JP, Lorenz M, Koehler K, Huebner A, Clark AJL 2009 Deficiency of ferritin heavy-chain nuclear import in Triple A syndrome implies nuclear oxidative damage as the primary disease mechanism. *Mol Endocrinol* 23:2086–2094
634. Charmandari E, Kino T, Chrousos GP 2004 Familial/sporadic glucocorticoid resistance: clinical phenotype and molecular mechanisms. *Ann NY Acad Sci* 1024:168–181
635. Hurley DM, Accili D, Stratakis CA, Karl M, Vamvakopoulos N, Rorer E, Constantine K, Taylor SI, Chrousos GP 1991 Point mutation causing a single amino acid substitution in the hormone binding domain of the glucocorticoid receptor in familial glucocorticoid resistance. *J Clin Invest* 87:680–686
636. Karl M, Lamberts SW, Detera-Wadleigh SD, Encio IJ, Stratakis CA, Hurley DM, Accili D, Chrousos GP 1993

- Familial glucocorticoid resistance caused by a splice-site deletion in the human glucocorticoid receptor gene. *J Clin Endocrinol Metab* 76:683–689
637. McMahon SK, Pretorius CJ, Ungerer JP, Salmon NJ, Conwell LS, Pearen MA, Batch JA 2010 Neonatal complete generalized glucocorticoid resistance and growth hormone deficiency caused by a novel homozygous mutation in helix 12 of the ligand binding domain of the glucocorticoid receptor gene (NR3C1). *J Clin Endocrinol Metab* 95:297–302
638. Kino T, Stauber RH, Resau JH, Pavlakakis GN, Chrousos GP 2001 Pathologic human GR mutant has a transdominant negative effect on the wild-type GR by inhibiting its translocation into the nucleus: importance of the ligand-binding domain for intracellular GR trafficking. *J Clin Endocrinol Metab* 86:5600–5608
639. Cole TJ, Blendy JA, Monaghan AP, Kriegstein K, Schmid W, Aguzzi A, Fantuzzi G, Hummler E, Unsicker K, Schütz G 1995 Targeted disruption of the glucocorticoid receptor gene blocks adrenergic chromaffin cell development and severely retards lung maturation. *Genes Dev* 9:1608–1621
640. Chang SS, Grunder S, Hanukoglu A, Rösler A, Mathew PM, Hanukoglu I, Schild L, Lu Y, Shimkets RA, Nelson-Williams C, Rossier BC, Lifton RP 1996 Mutations in subunits of the epithelial sodium channel cause salt wasting with hyperkalaemic acidosis, pseudohypoaldosteronism type 1. *Nat Genet* 12:248–253
641. Kerem E, Bistrizter T, Hanukoglu A, Hofmann T, Zhou Z, Bennett W, MacLaughlin E, Barker P, Nash M, Quittell L, Boucher R, Knowles MR 1999 Pulmonary epithelial sodium-channel dysfunction and excess airway liquid in pseudohypoaldosteronism. *N Engl J Med* 341:156–162
642. Geller DS, Rodriguez-Soriano J, Vallo Boado A, Schifter S, Bayer M, Chang SS, Lifton RP 1998 Mutations in the mineralocorticoid receptor gene cause autosomal dominant pseudohypoaldosteronism. *Nat Genet* 19:279–281
643. Sartorato P, Lapeyraque AL, Armanini D, Kuhnle U, Khaldi Y, Salomon R, Abadie V, Di Battista E, Naselli A, Racine A, Bosio M, Caprio M, Poulet-Young V, Chabrolle JP, Niaudet P, De Gennes C, Lecornec MH, Poisson E, Fusco AM, Loli P, Lombès M, Zennaro MC 2003 Different inactivating mutations of the mineralocorticoid receptor in fourteen families affected by type I pseudohypoaldosteronism. *J Clin Endocrinol Metab* 88:2508–2517
644. Geller DS, Farhi A, Pinkerton N, Fradley M, Moritz M, Spitzer A, Meinke G, Tsai FT, Sigler PB, Lifton RP 2000 Activating mineralocorticoid receptor mutation in hypertension exacerbated by pregnancy. *Science* 289:119–123
645. Rodríguez-Soriano J, Vallo A, Oliveros R, Castillo G 1983 Transient pseudohypoaldosteronism secondary to obstructive uropathy in infancy. *J Pediatr* 103:375–380
646. Chandar J, Abitbol C, Zilleruelo G, Gosalbez R, Montané B, Strauss J 1996 Renal tubular abnormalities in infants with hydronephrosis. *J Urol* 155:660–663
647. Kater CE, Biglieri EG 1994 Disorders of steroid 17 $\alpha$ -hydroxylase deficiency. *Endocrinol Metab Clin North Am* 23:341–357
648. Auchus RJ, Rainey WE 2004 Adrenarche—physiology, biochemistry and human disease. *Clin Endocrinol (Oxf)* 60:288–296
649. Gupta MK, Guryev OL, Auchus RJ 2003 5 $\alpha$ -Reduced C<sub>21</sub> steroids are substrates for human cytochrome P450c17. *Arch Biochem Biophys* 418:151–160
650. Milewich L, Mendonca BB, Arnhold I, Wallace AM, Donaldson MD, Wilson JD, Russell DW 1995 Women with steroid 5 $\alpha$ -reductase 2 deficiency have normal concentrations of plasma 5 $\alpha$ -dihydroprogesterone during the luteal phase. *J Clin Endocrinol Metab* 80:3136–3139
651. Homma K, Hasegawa T, Nagai T, Adachi M, Horikawa R, Fujiwara I, Tajima T, Takeda R, Fukami M, Ogata T 2006 Urine steroid hormone profile analysis in cytochrome P450 oxidoreductase deficiency: implication for the backdoor pathway to dihydrotestosterone. *J Clin Endocrinol Metab* 91:2643–2649
652. Hanley NA, Arlt W 2006 The human fetal adrenal cortex and the window of sexual differentiation. *Trends Endocrinol Metab* 17:391–397
653. Rommerts FFG, van der Molen HJ 1971 Occurrence and localization of 5 $\alpha$ -steroid reductase, 3 $\alpha$ - and 17 $\beta$ -hydroxysteroid dehydrogenases in hypothalamus and other brain tissues of the male rat. *Biochim Biophys Acta* 248:489–502
654. Corpéchet C, Robel P, Axelson M, Sjövall J, Baulieu EE 1981 Characterization and measurement of dehydroepiandrosterone sulfate in rat brain. *Proc Natl Acad Sci USA* 78:4704–4707
655. Corpéchet C, Synguelakis M, Talha S, Axelson M, Sjövall J, Vihko R, Baulieu EE, Robel P 1983 Pregnenolone and its sulfate ester in the rat brain. *Brain Res* 270:119–125
656. Mellon SH, Deschepper CF 1993 Neurosteroid biosynthesis: genes for adrenal steroidogenic enzymes are expressed in the brain. *Brain Res* 629:283–292
657. Compagnone NA, Mellon SH 2000 Neurosteroids: biosynthesis and function of these novel neuromodulators. *Front Neuroendocrinol* 21:1–56
658. Compagnone NA, Bulfone A, Rubenstein JL, Mellon SH 1995 Steroidogenic enzyme P450c17 is expressed in the embryonic central nervous system. *Endocrinology* 136:5212–5223
659. Mellon SH, Griffin LD 2002 Neurosteroids: biochemistry and clinical significance. *Trends Endocrinol Metab* 13:35–43
660. Mellon SH 2007 Neurosteroid regulation of central nervous system development. *Pharmacol Ther* 116:107–124
661. Furukawa A, Miyatake A, Ohnishi T, Ichikawa Y 1998 Steroidogenic acute regulatory protein (StAR) transcripts constitutively expressed in the adult rat central nervous system: colocalization of StAR, cytochrome P-450<sub>sc</sub> (CYP XIA1), and 3 $\beta$ -hydroxysteroid dehydrogenase in the rat brain. *J Neurochem* 71:2231–2238
662. Inoue T, Akahira J, Suzuki T, Darnel AD, Kaneko C, Takahashi K, Hatori M, Shirane R, Kumabe T, Kurokawa Y, Satomi S, Sasano H 2002 Progesterone production and actions in the human central nervous system and neurogenic tumors. *J Clin Endocrinol Metab* 87:5325–5331
663. King SR, Ginsberg SD, Ishii T, Smith RG, Parker KL, Lamb DJ 2004 The steroidogenic acute regulatory protein is expressed in steroidogenic cells of the day-old brain. *Endocrinology* 145:4775–4780
664. Hojo Y, Hattori TA, Enami T, Furukawa A, Suzuki K, Ishii HT, Mukai H, Morrison JH, Janssen WG, Kominami S, Harada N, Kimoto T, Kawato S 2004 Adult male rat hippocampus synthesizes estradiol from pregnenolone by cy-

- tochromes P45017 $\alpha$  and P450 aromatase localized in neurons. *Proc Natl Acad Sci USA* 101:865–870
665. Kibaly C, Patte-Mensah C, Mensah-Nyagan AG 2005 Molecular and neurochemical evidence for the biosynthesis of dehydroepiandrosterone in the adult spinal cord. *J Neurochem* 93:1220–1230
  666. Kimonides VG, Khatibi NH, Svendsen CN, Sofroniew MV, Herbert J 1998 Dehydroepiandrosterone (DHEA) and DHEA-sulfate (DHEAS) protect hippocampal neurons against excitatory amino acid-induced neurotoxicity. *Proc Natl Acad Sci USA* 95:1852–1857
  667. Karishma KK, Herbert J 2002 Dehydroepiandrosterone (DHEA) stimulates neurogenesis in the hippocampus of the rat, promotes survival of newly formed neurons and prevents corticosterone-induced suppression. *Eur J Neurosci* 16:445–453
  668. Majewska MD, Demirgören S, Spivak CE, London ED 1990 The neurosteroid dehydroepiandrosterone sulfate is an allosteric antagonist of the GABA<sub>A</sub> receptor. *Brain Res* 526:143–146
  669. Monnet FP, Mahé V, Robel P, Baulieu EE 1995 Neurosteroids, via  $\sigma$  receptors, modulate the [3H]norepinephrine release evoked by N-methyl-D-aspartate in the rat hippocampus. *Proc Natl Acad Sci USA* 92:3774–3778
  670. Suzuki M, Wright LS, Marwah P, Lardy HA, Svendsen CN 2004 Mitotic and neurogenic effects of dehydroepiandrosterone (DHEA) on human neural stem cell cultures derived from the fetal cortex. *Proc Natl Acad Sci USA* 101:3202–3207
  671. Bair SR, Mellon SH 2004 Deletion of the mouse P450c17 gene causes embryonic lethality. *Mol Cell Biol* 24:5383–5390
  672. Liu S, Sjövall J, Griffiths WJ 2003 Neurosteroids in rat brain: extraction, isolation and analysis by nanoscale liquid chromatography-electrospray mass spectrometry. *Anal Chem* 75:5835–5846
  673. Liere P, Pianos A, Eychenne B, Cambourg A, Liu S, Griffiths W, Schumacher M, Sjövall J, Baulieu EE 2004 Novel lipoidal derivatives of pregnenolone and dehydroepiandrosterone and absence of their sulfated counterparts in rodent brain. *J Lipid Res* 45:2287–2302
  674. Shimada M, Yoshinari K, Tanabe E, Shimakawa E, Kobashi M, Nagata K, Yamazoe Y 2001 Identification of ST2A1 as a rat brain neurosteroid sulfotransferase mRNA. *Brain Res* 920:222–225
  675. Shimizu C, Fuda H, Yanai H, Strott CA 2003 Conservation of the hydroxysteroid sulfotransferase SULT2B1 gene structure in the mouse: pre- and postnatal expression, kinetic analysis of isoforms, and comparison with prototypical SULT2A1. *Endocrinology* 144:1186–1193
  676. Geese WJ, Raftogianis RB 2001 Biochemical characterization and tissue distribution of human SULT2B1. *Biochem Biophys Res Com* 288:280–289
  677. Weill-Engerer S, David JP, Szdovitch V, Liere P, Eychenne B, Pianos A, Schumacher M, Delacourte A, Baulieu EE, Akwa Y 2002 Neurosteroid quantification in human brain regions: comparison between Alzheimer's and non-demented patients. *J Clin Endocrinol Metab* 87:5138–5143
  678. Flood JF, Morley JE, Roberts E 1992 Memory-enhancing effects in male mice of pregnenolone and steroids metabolically derived from it. *Proc Natl Acad Sci USA* 89:1567–1571
  679. Flood JF, Morley JE, Roberts E 1995 Pregnenolone sulfate enhances post-training memory processes when injected in very low doses into limbic system structures: the amygdala is by far the most sensitive. *Proc Natl Acad Sci USA* 92:10806–10810
  680. Mayo W, Dellu F, Robel P, Cherkaoui J, Le Moal M, Baulieu EE, Simon H 1993 Infusion of neurosteroids into the nucleus basalis magnocellularis affects cognitive processes in the rat. *Brain Res* 607:324–328
  681. Guennoun R, Fiddes RJ, Gouézou M, Lombès M, Baulieu EE 1995 A key enzyme in the biosynthesis of neurosteroids, 3 $\beta$ -hydroxysteroid dehydrogenase/ $\Delta$ 5- $\Delta$ 4 isomerase (3 $\beta$ -HSD) is expressed in rat brain. *Brain Res Mol Brain Res* 30:287–300
  682. Ibanez C, Guennoun R, Liere P, Eychenne B, Pianos A, El-Etr M, Baulieu EE, Schumacher M 2003 Developmental expression of genes involved in neurosteroidogenesis: 3 $\beta$ -hydroxysteroid dehydrogenase/ $\Delta$ 5- $\Delta$ 4 isomerase in the rat brain. *Endocrinology* 144:2902–2911
  683. Ukena K, Kohchi C, Tsutsui K 1999 Expression and activity of 3 $\beta$ -hydroxysteroid dehydrogenase/ $\Delta$ 5- $\Delta$ 4 isomerase in the rat Purkinje neuron during neonatal life. *Endocrinology* 140:805–813
  684. Selye H 1941 The anesthetic effects of steroid hormones. *Proc Soc Exp Biol Med* 46:116–121
  685. Koenig HL, Schumacher M, Ferzaz B, Thi AN, Ressouches A, Guennoun R, Jung-Testas I, Robel P, Akwa Y, Baulieu EE 1995 Progesterone synthesis and myelin formation by Schwann cells. *Science* 268:1500–1503
  686. Magnaghi V, Cavarretta I, Galbiati M, Martini L, Melcangi RC 2001 Neuroactive steroids and peripheral myelin proteins. *Brain Res Brain Res Rev* 37:360–371
  687. De Nicola AF, Gonzalez SL, Labombarda F, Deniselle MC, Garay L, Guennoun R, Schumacher M 2006 Progesterone treatment of spinal cord injury: effects on receptors, neurotrophins, and myelination. *J Mol Neurosci* 28:3–15
  688. Sakamoto H, Ukena K, Tsutsui K 2001 Effects of progesterone synthesized de novo in the developing Purkinje cell on its dendritic growth and synaptogenesis. *J Neurosci* 21:6221–6232
  689. Normington K, Russell DW 1992 Tissue distribution and kinetic characteristics of rat steroid 5 $\alpha$ -reductase enzymes. Evidence for distinct physiological functions. *J Biol Chem* 267:19548–19554
  690. Russell DW, Wilson JD 1994 Steroid 5 $\alpha$ -reductase: two genes/two enzymes. *Ann Rev Biochem* 63:25–61
  691. Dong E, Matsumoto K, Uzunova V, Sugaya I, Takahata H, Nomura H, Watanabe H, Costa E, Guidotti A 2001 Brain 5 $\alpha$ -dihydroprogesterone and allopregnanolone synthesis in a mouse model of protracted social isolation. *Proc Natl Acad Sci USA* 98:2849–2854
  692. Mahendroo MS, Cala KM, Landrum DP, Russell DW 1997 Fetal death in mice lacking 5 $\alpha$ -reductase type 1 caused by estrogen excess. *Mol Endocrinol* 11:917–927
  693. Poletti A, Negri-Cesi P, Rabuffetti M, Colciago A, Celotti F, Martini L 1998 Transient expression of the 5 $\alpha$ -reductase type 2 isozyme in the rat brain in late fetal and early postnatal life. *Endocrinology* 139:2171–2178
  694. Poletti A, Coscarella A, Negri-Cesi P, Colciago A, Celotti F, Martini L 1998 5 $\alpha$ -Reductase isozymes in the central nervous system. *Steroids* 63:246–251
  695. Griffin LD, Mellon SH 1999 Selective serotonin reuptake



- inhibitors directly alter activity of neurosteroidogenic enzymes. *Proc Natl Acad Sci USA* 96:13512–13517
696. Majewska MD, Harrison NL, Schwartz RD, Barker JL, Paul SM 1986 Steroid hormone metabolites are barbiturate-like modulators of the GABA receptor. *Science* 232:1004–1007
697. Gee KW 1988 Steroid modulation of the GABA/benzodiazepine receptor-linked chloride ionophore. *Mol Neurobiol* 2:291–317
698. Turner DM, Ransom RW, Yang JS, Olsen RW 1989 Steroid anesthetics and naturally occurring analogs modulate the  $\gamma$ -aminobutyric acid receptor complex at a site distinct from barbiturates. *J Pharmacol Exp Ther* 248:960–966
699. Zhu WJ, Vicini S 1997 Neurosteroid prolongs GABA<sub>A</sub> channel deactivation by altering kinetics of deactivated states. *J Neurosci* 17:4022–4031
700. Smith SS, Gong QH, Hsu FC, Markowitz RS, French-Mullen JM, Li X 1998 GABA<sub>A</sub> receptor  $\alpha 4$  subunit suppression prevents withdrawal properties of an endogenous steroid. *Nature* 392:926–930
701. Griffin LD, Gong W, Verot L, Mellon SH 2004 Niemann-Pick type C disease involves disrupted neurosteroidogenesis and responds to allopregnanolone. *Nat Med* 10:704–711
702. Casey ML, Winkel CA, MacDonald PC 1983 Conversion of progesterone to deoxycorticosterone in the human fetus: steroid 21-hydroxylase activity in fetal tissues. *J Steroid Biochem* 18:449–452
703. Lambert JJ, Belelli D, Hill-Venning C, Peters JA 1995 Neurosteroids and GABA<sub>A</sub> receptor function. *Trends Pharmacol Sci* 16:295–303
704. Kishimoto W, Hiroi T, Shiraishi M, Osada M, Imaoka S, Kominami S, Igarashi T, Funae Y 2004 Cytochrome P450 2D catalyze steroid 21-hydroxylation in the brain. *Endocrinology* 145:699–705
705. Voutilainen R, Ilvesmäki V, Miettinen PJ 1991 Low expression of  $3\beta$ -hydroxy-5-ene steroid dehydrogenase gene in human fetal adrenals *in vivo*; adrenocorticotropin and protein kinase C-dependent regulation in adrenocortical cultures. *J Clin Endocrinol Metab* 72:761–767
706. Kitada M, Kamataki T, Itahashi K, Rikihisa T, Kanakubo Y 1987 P-450 HFLa, a form of cytochrome P-450 purified from human fetal livers, is the  $16\alpha$ -hydroxylase of dehydroepiandrosterone 3-sulfate. *J Biol Chem* 262:13534–13537
707. Miller KK, Cai J, Ripp SL, Pierce Jr WM, Rushmore TH, Prough RA 2004 Stereo- and regioselectivity account for the diversity of dehydroepiandrosterone (DHEA) metabolites produced by liver microsomal cytochromes P450. *Drug Metab Dispos* 32:305–313
708. Leeder JS, Gaedigk R, Marcucci KA, Gaedigk A, Vyhldal CA, Schindel BP, Pearce RE 2005 Variability of CYP3A7 expression in human fetal liver. *J Pharmacol Exp Ther* 314:626–635
709. Fujieda K, Faiman C, Feyes FI, Winter JSD 1982 The control of steroidogenesis by human fetal adrenal cells in tissue culture: IV. The effects of exposure to placental steroids. *J Clin Endocrinol Metab* 54:89–94
710. Siiteri PK, MacDonald PC 1966 Placental estrogen biosynthesis during human pregnancy. *J Clin Endocrinol Metab* 26:751–761
711. Csapo AI, Pulkkinen MO, Wiest WG 1973 Effects of luteectomy and progesterone replacement therapy in early pregnant patients. *Am J Obstet Gynecol* 115:759–765
712. Pasqualini JR, Nguyen BL, Uhrich F, Wqvist N, Diczfalussy E 1970 Cortisol and cortisone metabolism in the human foeto-placental unit at midgestation. *J Steroid Biochem* 1:209–219
713. Kari MA, Raivio KO, Stenman UH, Voutilainen R 1996 Serum cortisol, dehydroepiandrosterone sulfate, and sterol-binding globulins in preterm neonates: effects of gestational age and dexamethasone therapy. *Pediatr Res* 40:319–324
714. Di Blasio AM, Voutilainen R, Jaffe RB, Miller WL 1987 Hormonal regulation of mRNAs for P450<sub>scc</sub> (cholesterol side-chain cleavage enzyme) and P450<sub>c17</sub> ( $17\alpha$ -hydroxylase/17,20 lyase) in cultured human fetal adrenal cells. *J Clin Endocrinol Metab* 65:170–175
715. Durkee TJ, McLean MP, Hales DB, Payne AH, Waterman MR, Khan I, Gibori G 1992 P450–17 $\alpha$  and P450<sub>scc</sub> gene expression and regulation in the rat placenta. *Endocrinology* 130:1309–1317
716. Sklar CA, Kaplan SL, Grumbach MM 1980 Evidence for dissociation between adrenarche and gonadarche: studies in patients with idiopathic precocious puberty, gonadal dysgenesis, isolated gonadotropin deficiency, and constitutionally delayed growth and adolescence. *J Clin Endocrinol Metab* 51:548–556
717. Miller WL 2009 Androgen synthesis in adrenarche. *Rev Endocr Metab Disord* 10:3–17
718. Arlt W, Justl HG, Callies F, Reincke M, Hübler D, Oettel M, Ernst M, Schulte HM, Allolio B 1998 Oral dehydroepiandrosterone for adrenal androgen replacement: pharmacokinetics and peripheral conversion to androgens and estrogens in young healthy females after dexamethasone suppression. *J Clin Endocrinol Metab* 83:1928–1934
719. Mellon SH, Shively JE, Miller WL 1991 Human proopiomelanocortin (79–96), a proposed androgen stimulatory hormone, does not affect steroidogenesis in cultured human fetal adrenal cells. *J Clin Endocrinol Metab* 72:19–22
720. Penhoat A, Sanchez P, Jaillard C, Langlois D, Bégeot M, Saez JM 1991 Human proopiomelanocortin (79–96), a proposed cortical androgen stimulating hormone, does not affect steroidogenesis in cultured human adult adrenal cells. *J Clin Endocrinol Metab* 72:23–26
721. Robinson P, Bateman A, Mulay S, Spencer SJ, Jaffe RB, Solomon S, Bennett HPJ 1991 Isolation and characterization of three forms of joining peptide from adult pituitaries: lack of adrenal androgen stimulating activity. *Endocrinology* 129:859–867
722. Cutler Jr GB, Glenn M, Bush M, Hodgen GD, Graham CE, Loriaux DL 1978 Adrenarche: a survey of rodents, domestic animals and primates. *Endocrinology* 103:2112–2118
723. Smail PJ, Faiman C, Hobson WC, Fuller GB, Winter JSD 1982 Further studies on adrenarche in nonhuman primates. *Endocrinology* 111:844–848
724. Gell JS, Carr BR, Sasano H, Atkins B, Margraf L, Mason JL, Rainey WE 1998 Adrenarche results from development of a  $3\beta$ -hydroxysteroid dehydrogenase-deficient adrenal reticularis. *J Clin Endocrinol Metab* 83:3695–3701
725. Dardis A, Saraco N, Rivarola MA, Belgorosky A 1999 Decrease in the expression of the  $3\beta$ -hydroxysteroid dehydrogenase gene in human adrenal tissue during prepu-

- berly and early puberty: implications for the mechanism of adrenarche. *Pediatr Res* 45:384–388
726. Yanase T, Sasano H, Yubisui T, Sakai Y, Takayanagi R, Nawata H 1998 Immunohistochemical study of cytochrome b<sub>5</sub> in human adrenal gland and in adrenocortical adenomas from patients with Cushing's syndrome. *Endocr J* 45:89–95
727. Miller WL 1999 The molecular basis of premature adrenarche: an hypothesis. *Acta Paediatr Suppl* 88(Suppl 433): 60–66
728. Tee MK, Dong Q, Miller WL 2008 Pathways leading to the phosphorylation of P450c17 and to the posttranslational regulation of androgen biosynthesis. *Endocrinology* 149: 2667–2677
729. Ibáñez L, Potau N, Virdis R, Zampolli M, Terzi C, Gussinyé M, Carrascosa A, Vicens-Calvet E 1993 Postpubertal outcome in girls diagnosed of premature pubarche during childhood: increased frequency of functional ovarian hyperandrogenism. *J Clin Endocrinol Metab* 76:1599–1603
730. Oppenheimer E, Linder B, DiMartino-Nardi J 1995 Decreased insulin sensitivity in prepubertal girls with premature adrenarche and acanthosis nigricans. *J Clin Endocrinol Metab* 80:614–618
731. Ibanez L, Potau N, Zampolli M, Prat N, Virdis R, Vicens-Calvet E, Carrascosa A 1996 Hyperinsulinemia in postpubertal girls with a history of premature pubarche and functional ovarian hyperandrogenism. *J Clin Endocrinol Metab* 81:1237–1243
732. Ibáñez L, Potau N, Marcos MV, de Zegher F 1999 Exaggerated adrenarche and hyperinsulinism in adolescent girls born small for gestational age. *J Clin Endocrinol Metab* 84:4739–4741

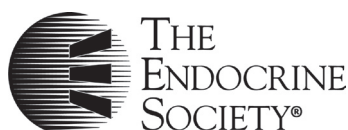

**Join The Endocrine Society** and network with  
endocrine thought leaders from around the world.

[www.endo-society.org/join](http://www.endo-society.org/join)
